# Supplementary material for: A systematic integrative approach reveals novel microRNAs in diabetic nephropathy
Source: PubMed Central journal article supplement — J Res Med Sci. 2020 Jan 20;25:1. doi: 10.4103/jrms.JRMS_289_19 (PMC7003547; doi:10.4103/jrms.jrms_289_19), 2020-01-20
Supplement: JRMS-25-1_Suppl1.pdf [file JRMS-25-1_Suppl1.pdf]

|           |            |           |
|-----------|------------|-----------|
| SGCE      | 1.2387758  | 0.0000887 |
| CDC42EP3  | 2.3723015  | 0.0000893 |
| FAM65A    | 1.9159614  | 0.0000893 |
| PLCE1     | 3.1890592  | 0.0000904 |
| PDGFRA    | 1.383961   | 0.000094  |
| PLCG2     | 3.274883   | 0.000094  |
| FAM20B    | 1.2630131  | 0.0000964 |
| PRKD1     | 1.1139029  | 0.0000986 |
| ARMCX1    | 1.0976911  | 0.0000994 |
| CR1       | 2.0010303  | 0.0000994 |
| POGLUT1   | 1.1432829  | 0.0000994 |
| FGF1      | 2.1532156  | 0.0000103 |
| FRY       | 2.212746   | 0.0000105 |
| LHFP      | 1.7480419  | 0.0000106 |
| SMAD6     | 1.6108979  | 0.000011  |
| CTNBP1    | 1.6168853  | 0.0000113 |
| KAT2B     | 1.1981356  | 0.0000114 |
| TNNT2     | 3.3617747  | 0.0000117 |
| MTSS1     | 1.5378591  | 0.0000123 |
| FOXC1     | 1.8127249  | 0.0000129 |
| GPX1      | 2.4475268  | 0.0000129 |
| MED4      | -2.4087686 | 0.0000138 |
| SDC2      | 1.3876781  | 0.0000139 |
| CAV2      | 1.3640898  | 0.0000141 |
| MXRA8     | 1.8018643  | 0.0000142 |
| NFE2L3    | 1.3489951  | 0.000016  |
| EFEMP1    | 1.0853218  | 0.0000162 |
| APBB2     | 1.2143333  | 0.0000168 |
| CXADR     | 1.6363663  | 0.0000168 |
| HS3ST3A1  | 2.4682934  | 0.0000168 |
| NRIP2     | 1.7973644  | 0.0000168 |
| SSB       | 1.0135083  | 0.0000168 |
| SSBP2     | 1.2640565  | 0.0000181 |
| SYNPO     | 2.3517805  | 0.0000183 |
| ADRA2A    | -1.0794943 | 0.0000187 |
| IQGAP2    | 1.4782861  | 0.0000187 |
| CD200     | 2.1594865  | 0.0000192 |
| ATP10A    | 2.7100195  | 0.0000201 |
| KLK6      | 2.576981   | 0.0000203 |
| SERPINE2  | -1.8750107 | 0.000021  |
| TSPYL4    | 1.0397336  | 0.000021  |
| SPP1      | -1.275855  | 0.0000214 |
| MMP7      | 1.6939867  | 0.0000221 |
| TBXA2R    | 1.5611527  | 0.0000222 |
| LARP7     | 1.0225686  | 0.0000234 |
| C2orf68   | 1.0276585  | 0.0000238 |
| ADH1B     | -2.5238886 | 0.000024  |
| PAFAH1B1  | 1.079816   | 0.000024  |
| KLHL3     | 1.1773147  | 0.0000242 |
| SRGAP2C   | 1.5172483  | 0.0000242 |
| BCAM      | 1.430177   | 0.0000243 |
| RASL11B   | 2.2748639  | 0.0000248 |
| TCEAL2    | 2.2338226  | 0.0000252 |
| CLCC1     | 1.1009584  | 0.0000255 |
| VEGFA     | 1.5334069  | 0.0000267 |
| BMP7      | 1.8307567  | 0.0000272 |
| PLAC8     | 2.8651431  | 0.0000272 |
| AIF1      | 1.6991804  | 0.0000283 |
| CTC       | 1.1628619  | 0.0000293 |
| OLFML3    | -1.2673739 | 0.0000323 |
| CAPN2     | 1.4542798  | 0.0000338 |
| NDN       | 1.4308931  | 0.0000341 |
| CEP63     | 1.004617   | 0.000035  |
| MGAT5     | 2.4942244  | 0.0000353 |
| SAP18     | 1.019407   | 0.0000353 |
| FOXD1     | 1.4930854  | 0.0000354 |
| DAG1      | 1.4962429  | 0.0000359 |
| TUSC3     | 1.5775606  | 0.0000366 |
| PPP2R2B   | 1.3142274  | 0.0000375 |
| TSPYL5    | 1.2807036  | 0.0000378 |
| KBTBD11   | 1.4949437  | 0.0000394 |
| KLC1      | 1.2346884  | 0.0000409 |
| MYOSC     | 1.5264211  | 0.0000418 |
| TCF21     | 2.603618   | 0.0000419 |
| MID2      | 1.1600079  | 0.0000436 |
| UBAP2     | 1.1259846  | 0.0000439 |
| LPL       | -1.1238488 | 0.0000445 |
| SYNJ2     | 1.1775048  | 0.0000469 |
| LUM       | -2.7577565 | 0.0000482 |
| F2R       | 1.8487421  | 0.0000497 |
| LRRC2     | 3.380505   | 0.0000497 |
| GRK5      | 1.930186   | 0.0000499 |
| COL4A6    | 1.1547924  | 0.0000513 |
| NEDD9     | 1.3147705  | 0.0000516 |
| LOC730101 | 1.5312631  | 0.0000524 |
| SNX1      | 1.3453604  | 0.0000528 |
| CLIC5     | 2.1436111  | 0.0000538 |
| FAXDC2    | 1.1124853  | 0.0000538 |
| ATP9A     | 1.2944129  | 0.0000557 |
| TIAM1     | 2.565234   | 0.0000575 |

|         |             |
|---------|-------------|
| CAMK2A  | 0.044395874 |
| STK4    | 0.044395874 |
| SGK2    | 0.044395874 |
| EIF2AK2 | 0.046096147 |
| PTK6    | 0.046096147 |
| ALK     | 0.046096147 |
| TBK1    | 0.046096147 |

|                  |             |
|------------------|-------------|
| hsa-miR-142-3p   | 0.0033522   |
| hsa-miR-621      | 0.003812133 |
| hsa-miR-4790-5p  | 0.004133329 |
| hsa-miR-3689f    | 0.004169457 |
| hsa-miR-3689e    | 0.004169457 |
| hsa-miR-3689b    | 0.004169457 |
| hsa-miR-3689a-5p | 0.004169457 |
| hsa-miR-2909     | 0.004552737 |
| hsa-miR-1468     | 0.00467431  |
| hsa-miR-519e     | 0.004743834 |
| hsa-miR-515-3p   | 0.004743834 |
| hsa-miR-496      | 0.004760752 |
| hsa-miR-151-3p   | 0.005212934 |
| hsa-miR-296-3p   | 0.005837563 |
| hsa-miR-409-5p   | 0.005851493 |
| hsa-miR-584      | 0.006572509 |
| hsa-miR-4715-5p  | 0.007004227 |
| hsa-miR-99b      | 0.007037664 |
| hsa-miR-99a      | 0.007037664 |
| hsa-miR-100      | 0.007037664 |
| hsa-miR-3659     | 0.007841984 |
| hsa-miR-3605-3p  | 0.007841984 |
| hsa-miR-554      | 0.008515287 |
| hsa-miR-371b-3p  | 0.008678401 |
| hsa-miR-1263     | 0.008739121 |
| hsa-miR-423-3p   | 0.008765228 |
| hsa-miR-875-5p   | 0.008999604 |
| hsa-miR-509-3p   | 0.00978046  |
| hsa-miR-628-3p   | 0.010103638 |
| hsa-miR-196b     | 0.010599104 |
| hsa-miR-196a     | 0.010599104 |
| hsa-miR-208b     | 0.011416889 |
| hsa-miR-208a     | 0.011416889 |
| hsa-miR-3150b-5p | 0.011925326 |
| hsa-miR-3150a-5p | 0.011925326 |
| hsa-miR-4757-3p  | 0.012042305 |
| hsa-miR-1306     | 0.012379779 |
| hsa-miR-662      | 0.012854452 |
| hsa-miR-4781-5p  | 0.01427551  |
| hsa-miR-487b     | 0.015689257 |
| hsa-miR-4783-5p  | 0.015689257 |
| hsa-miR-3132     | 0.01599178  |
| hsa-miR-3681     | 0.016487928 |
| hsa-miR-660      | 0.017242191 |
| hsa-miR-492      | 0.017574087 |
| hsa-miR-4661-5p  | 0.017574087 |
| hsa-miR-379      | 0.019332648 |
| hsa-miR-3529     | 0.019332648 |
| hsa-miR-324-5p   | 0.019589093 |
| hsa-miR-1537     | 0.020120163 |
| hsa-miR-3117-3p  | 0.020853966 |
| hsa-miR-601      | 0.022655459 |
| hsa-miR-645      | 0.022697657 |
| hsa-miR-4791     | 0.022842568 |
| hsa-miR-3201     | 0.022842568 |
| hsa-miR-1247     | 0.022842568 |
| hsa-miR-1973     | 0.023379911 |
| hsa-miR-553      | 0.025716193 |
| hsa-miR-3186-5p  | 0.025716193 |
| hsa-miR-3912     | 0.026208293 |
| hsa-miR-191      | 0.026542521 |
| hsa-miR-4506     | 0.026598909 |
| hsa-miR-720      | 0.026699083 |
| hsa-miR-1225-5p  | 0.026772085 |
| hsa-miR-4772-5p  | 0.027254479 |
| hsa-miR-4278     | 0.028337222 |
| hsa-miR-4520b-5p | 0.031426247 |
| hsa-miR-4520a-5p | 0.031426247 |
| hsa-miR-4671-5p  | 0.03186805  |
| hsa-miR-3622a-5p | 0.033452751 |
| hsa-miR-4540     | 0.033643415 |
| hsa-miR-3610     | 0.034389222 |
| hsa-miR-564      | 0.036175434 |
| hsa-miR-639      | 0.036880805 |
| hsa-miR-215      | 0.036947332 |
| hsa-miR-192      | 0.036947332 |
| hsa-miR-4317     | 0.038996252 |
| hsa-miR-4529-3p  | 0.040103465 |
| hsa-miR-542-5p   | 0.040112101 |
| hsa-miR-4661-3p  | 0.04081277  |
| hsa-miR-517b     | 0.041792975 |
| hsa-miR-516a-5p  | 0.041980257 |
| hsa-miR-556-5p   | 0.043301095 |
| hsa-miR-550b     | 0.045397502 |
| hsa-miR-126      | 0.046081901 |
| hsa-miR-95       | 0.046855201 |
| hsa-miR-1249     | 0.047772338 |
| hsa-miR-503      | 0.049368377 |
| hsa-miR-3937     | 0.049675934 |
| hsa-miR-4776-5p  | 0.049786704 |

|          |            |           |
|----------|------------|-----------|
| GHR      | 1.9606506  | 0.0000588 |
| COL1A2   | -1.8397098 | 0.000062  |
| N4BP2L2  | 2.0835798  | 0.000062  |
| ITGB5    | 2.1324174  | 0.0000634 |
| TM2D1    | 1.6804243  | 0.0000637 |
| MAFB     | 2.0596672  | 0.0000646 |
| SH3GLB1  | 1.135722   | 0.0000648 |
| STXBP1   | 1.3676155  | 0.0000678 |
| CTDSPL   | 1.0665437  | 0.0000681 |
| MOXD1    | -2.1416694 | 0.0000689 |
| CETN3    | 1.161823   | 0.0000723 |
| PCDHA1   | 1.2073355  | 0.0000726 |
| AP4S1    | 1.1039448  | 0.0000744 |
| BCAR3    | 1.3770522  | 0.0000744 |
| CD1C     | -1.271745  | 0.0000744 |
| PLA2R1   | 2.0701408  | 0.0000744 |
| SNCA     | 2.2977017  | 0.0000744 |
| KLK7     | 2.2463036  | 0.0000748 |
| CDKN1C   | 1.6836692  | 0.0000756 |
| NPR1     | 1.3983802  | 0.0000757 |
| SEMA5A   | 1.7763495  | 0.0000757 |
| SPARC    | 1.4781334  | 0.0000757 |
| RAI14    | 1.2473578  | 0.000076  |
| TRPC6    | 1.4377722  | 0.0000765 |
| RNASE6   | -1.4829983 | 0.0000813 |
| PFN1     | 1.2307214  | 0.0000836 |
| DLC1     | 1.6702333  | 0.000084  |
| MANSC1   | 1.0134643  | 0.0000845 |
| DYX1C1   | 1.0723986  | 0.0000854 |
| PHYHIP   | 1.2492521  | 0.0000865 |
| F3       | 2.3665041  | 0.0000897 |
| AKT3     | 1.1961014  | 0.0000907 |
| PNN      | 1.0847631  | 0.0000908 |
| PTPRN2   | 1.3069881  | 0.0000925 |
| SEP7     | 1.5066704  | 0.000093  |
| ANXA2P2  | 1.2056514  | 0.000093  |
| PARD3    | 1.1491747  | 0.000093  |
| TNS2     | 1.4184758  | 0.000093  |
| KYAT1    | 1.033807   | 0.0000976 |
| FGF9     | 1.508018   | 0.0000988 |
| FAM13B   | 1.2737073  | 0.0000997 |
| TRIL     | 1.7354962  | 0.000101  |
| HOXD1    | 1.3405756  | 0.000102  |
| RAPGEF3  | 1.046749   | 0.000102  |
| AMIGO2   | 2.3526597  | 0.000104  |
| MS4A4A   | -1.6334008 | 0.000105  |
| MXRA7    | 1.2368123  | 0.000106  |
| CHI3L1   | 3.7363925  | 0.000109  |
| NAP1L2   | 1.0929491  | 0.000109  |
| SCAMP1   | 1.1768087  | 0.000109  |
| SERPINA3 | -2.5206796 | 0.000109  |
| VPS13D   | 1.0228951  | 0.000111  |
| RASGRP3  | 1.7798871  | 0.000114  |
| MYO1E    | 1.8794224  | 0.000115  |
| HOMER3   | -1.2526048 | 0.000118  |
| ITIH5    | 2.1420376  | 0.000124  |
| BST1     | 1.0910198  | 0.000125  |
| SIRPA    | 1.090735   | 0.000126  |
| TPM2     | 2.1201708  | 0.000127  |
| MAGI2    | 2.6948428  | 0.000129  |
| LCK      | -1.7868584 | 0.00013   |
| MAP1B    | 1.8778745  | 0.00013   |
| ZNF804A  | 2.3826739  | 0.00013   |
| ARL4C    | -1.4358811 | 0.000132  |
| MYO22    | 1.7956793  | 0.000134  |
| CAND2    | 1.6561481  | 0.000138  |
| ETS2     | 1.8946497  | 0.000138  |
| COL4A5   | 2.0045766  | 0.000139  |
| SIK3     | 1.219771   | 0.00014   |
| GMDS     | 1.4989866  | 0.000141  |
| QKI      | 1.3501247  | 0.000147  |
| CLDN5    | 1.8916945  | 0.000149  |
| ARHGEF40 | 1.2341299  | 0.000154  |
| NEBL     | 1.1896407  | 0.000156  |
| UGGT2    | 1.0574251  | 0.00016   |
| C7       | -2.2454338 | 0.000163  |
| PCSK6    | 1.4514688  | 0.000165  |
| CBLB     | 1.6560284  | 0.000173  |
| SLC35F2  | -1.05585   | 0.000175  |
| VSIG4    | -1.6800034 | 0.000181  |
| SPOCK1   | 2.8930556  | 0.000182  |
| ANKMY2   | 1.0137114  | 0.000188  |
| MSH5     | 1.2304501  | 0.000188  |
| SERINC5  | 1.5836319  | 0.00019   |
| TPPP3    | 2.8789529  | 0.000192  |
| TRIM16   | -1.0719811 | 0.000193  |
| F5       | 1.4989472  | 0.000198  |
| CFB      | -1.9578613 | 0.000203  |
| CPA3     | -2.2438442 | 0.000203  |
| CLEC10A  | -1.0695177 | 0.000205  |

|           |            |          |
|-----------|------------|----------|
| JAKMIP2   | 1.5498923  | 0.000206 |
| MIR22     | 1.0593102  | 0.000207 |
| SEMA3G    | 2.7477958  | 0.000208 |
| LINC00472 | 1.5305085  | 0.000211 |
| MCM6      | -1.7075455 | 0.000213 |
| SPON1     | 2.0151641  | 0.000218 |
| ITGA3     | 1.2589405  | 0.00022  |
| NFASC     | 3.0487964  | 0.000221 |
| FAM98A    | 1.1995182  | 0.000226 |
| RFC1      | 1.1254642  | 0.000226 |
| CD163     | -1.7817873 | 0.000229 |
| DMD       | 1.4461003  | 0.000229 |
| P2RY14    | -1.5684096 | 0.000229 |
| NES       | 2.6355264  | 0.000237 |
| NAP1L3    | 1.3731851  | 0.000238 |
| SOBP      | 1.2574065  | 0.000238 |
| HTRA1     | 1.9094032  | 0.000243 |
| NDNF      | 3.4862996  | 0.000243 |
| TRAM2     | 1.2836296  | 0.000243 |
| NPR3      | 1.3439166  | 0.000244 |
| DHCR24    | -1.2217701 | 0.000252 |
| COL6A3    | -2.4549202 | 0.000253 |
| LEPROT    | 1.5271719  | 0.000255 |
| COLGALT2  | 1.725534   | 0.000262 |
| ARHGEF12  | 1.0543074  | 0.000269 |
| SULF1     | 1.8556289  | 0.000283 |
| FBLN1     | -1.2037576 | 0.000293 |
| TTC39A    | -1.0999093 | 0.000293 |
| ZFP36L2   | 1.5876117  | 0.000293 |
| MS4A6A    | -1.9671018 | 0.000297 |
| CDCP1     | -1.0531096 | 0.000298 |
| LIMS2     | 1.3449754  | 0.000298 |
| FAM134B   | 1.1726544  | 0.000308 |
| GCNT3     | -1.1644225 | 0.000314 |
| UBD       | 1.1925645  | 0.000314 |
| SNORA64   | 2.4572428  | 0.000318 |
| ALG13     | 1.022953   | 0.000323 |
| HRG       | 1.8190448  | 0.000323 |
| MIR6883   | 1.1847667  | 0.000323 |
| FN1       | -1.5416103 | 0.000328 |
| JAM3      | 1.6215822  | 0.000329 |
| OLFML2A   | 1.5447657  | 0.000331 |
| CLIP3     | 1.4728409  | 0.000338 |
| ROBO1     | 1.6782468  | 0.000341 |
| CPEB1     | 1.0592383  | 0.000349 |
| GPRC5A    | 1.7359337  | 0.000352 |
| CREB3L2   | 1.138542   | 0.000356 |
| APOLD1    | 2.3236991  | 0.000363 |
| STX2      | 1.012574   | 0.000385 |
| ZNF124    | 1.7224394  | 0.000385 |
| ARRB1     | 1.3961008  | 0.000386 |
| LTF       | -3.5563428 | 0.000393 |
| WT1       | 2.4756367  | 0.000399 |
| SHROOM2   | 1.0255915  | 0.000402 |
| CYBB      | -1.1784665 | 0.000417 |
| NXN       | 1.1384267  | 0.000417 |
| ST14      | -1.0287289 | 0.000431 |
| MED21     | 1.1310205  | 0.000434 |
| MIR4738   | 1.107047   | 0.000434 |
| NOTCH2NL  | -2.9861229 | 0.000439 |
| KCND3     | 1.9391047  | 0.000451 |
| BACE1     | 1.0267366  | 0.000452 |
| KCNJ8     | -1.0837107 | 0.000452 |
| MME       | 1.523386   | 0.000455 |
| TMPRSS4   | 1.7551675  | 0.000457 |
| TUG1      | 1.0031019  | 0.000467 |
| MIR6872   | 1.4647285  | 0.000474 |
| SPOCK2    | 1.1164146  | 0.000475 |
| OBFC1     | 1.2968051  | 0.00049  |
| NME7      | 1.0510267  | 0.000496 |
| PSMD11    | 1.0022036  | 0.000501 |
| TACC2     | 1.2783019  | 0.000511 |
| VTCN1     | -1.8870116 | 0.000516 |
| CSF1R     | -1.0368851 | 0.000533 |
| MEGF9     | 1.5321269  | 0.000544 |
| SLK       | 1.5513557  | 0.000563 |
| FYB       | -1.3030202 | 0.000566 |
| ZNF91     | 2.120593   | 0.000567 |
| KIAA0040  | 1.0212263  | 0.000576 |
| C8orf33   | 1.3602083  | 0.000577 |
| PDLIM2    | 1.5284481  | 0.000584 |
| ID4       | 1.916321   | 0.000588 |
| MYLK3     | 2.8833793  | 0.0006   |
| AVP1      | 1.0720171  | 0.000604 |
| CDC20     | -1.1292545 | 0.000606 |
| CUX1      | 1.0232305  | 0.000621 |
| LEF1      | -1.7648354 | 0.000637 |
| BZW2      | -1.0106252 | 0.000639 |
| GPNUMB    | 1.3594064  | 0.000672 |
| C14orf132 | 1.6945489  | 0.000675 |

|           |            |          |
|-----------|------------|----------|
| MYLIP     | 1.441168   | 0.000692 |
| RPL37A    | -1.1667821 | 0.000694 |
| ERVMER34  | 1.0345606  | 0.000696 |
| EMP2      | 1.3049156  | 0.000704 |
| BLNK      | -1.73899   | 0.000733 |
| PTPRO     | 3.0750584  | 0.000743 |
| WWC3      | 1.430949   | 0.000766 |
| NPAS3     | 1.1215733  | 0.000767 |
| DST       | 1.1086724  | 0.000789 |
| SASH3     | -1.090703  | 0.000796 |
| EPB41L5   | 1.5797544  | 0.000797 |
| EXT2      | 1.1445811  | 0.000817 |
| HSPA2     | 1.2928556  | 0.000817 |
| PCOLCE2   | 3.2140968  | 0.000839 |
| DDN       | 2.115393   | 0.00084  |
| HLA-DQB1  | -1.3917635 | 0.000859 |
| PTGDS     | 2.624381   | 0.000859 |
| PTGER4    | 2.7343602  | 0.000881 |
| GADD45B   | 1.5005967  | 0.000903 |
| KPNA6     | 1.0120373  | 0.000911 |
| CAPG      | -1.5392373 | 0.000948 |
| BEX4      | 1.1560877  | 0.00095  |
| VILL      | 1.642681   | 0.000965 |
| IL10RA    | -1.6775712 | 0.000981 |
| THBS2     | -2.1500238 | 0.000992 |
| FLT1      | 2.1291377  | 0.00105  |
| GLT8D1    | 1.1002449  | 0.00105  |
| MYO1B     | 1.1787571  | 0.00107  |
| CPVL      | -1.1289801 | 0.00108  |
| EML1      | 1.6934692  | 0.00109  |
| HPS5      | 1.7971928  | 0.0011   |
| SEL1L3    | -1.1313074 | 0.0011   |
| ITGB2     | -1.4278224 | 0.00112  |
| PCMTD2    | 1.2222761  | 0.00115  |
| CTGF      | 2.036012   | 0.00116  |
| WFS1      | 1.0840613  | 0.00116  |
| NLK       | 1.3827768  | 0.00118  |
| SOCS2     | 1.0815877  | 0.00118  |
| SYNE1     | 1.1291762  | 0.00118  |
| ZBTB10    | 1.0732776  | 0.00118  |
| KANK3     | 1.5797183  | 0.00126  |
| RNF220    | 1.2538603  | 0.00126  |
| IFIT1     | 1.0604484  | 0.00129  |
| TYRO3     | 1.6634745  | 0.00131  |
| CST6      | -1.1327461 | 0.00133  |
| CSPP1     | 1.0839032  | 0.00134  |
| APOD      | 2.3726853  | 0.00135  |
| DCN       | 1.254013   | 0.00143  |
| IL13RA2   | 2.5779326  | 0.00143  |
| C3        | -2.9553662 | 0.00145  |
| MYL9      | 1.9702882  | 0.00145  |
| PHACTR4   | 1.3119996  | 0.00145  |
| CYP3A5    | 1.1603612  | 0.00147  |
| ARF5      | -1.1857085 | 0.00149  |
| SOX9      | -1.5544121 | 0.00149  |
| HIST1H2BK | 1.7429936  | 0.0015   |
| PSD3      | 1.2459225  | 0.00154  |
| CD53      | -1.7581184 | 0.00158  |
| MEIS3P1   | 1.0466875  | 0.0016   |
| TDO2      | -1.7014973 | 0.00164  |
| TNNI1     | 1.5072969  | 0.00165  |
| SOX4      | -1.4288754 | 0.00168  |
| ZBED8     | 1.0754041  | 0.00169  |
| ARHGAP15  | 1.1910151  | 0.0017   |
| CORO1A    | -1.7925801 | 0.0017   |
| RARRES1   | -1.4260237 | 0.00171  |
| SERPINF1  | -1.606484  | 0.00175  |
| SLC14A1   | 1.5756048  | 0.00183  |
| APPBP2    | 1.1024252  | 0.00185  |
| WIPF1     | -1.1093183 | 0.00187  |
| CD2       | -1.5649755 | 0.00191  |
| EMCN      | 2.0612002  | 0.00191  |
| SEC14L1   | 1.3780913  | 0.00191  |
| JARID2    | 1.2359188  | 0.00193  |
| BMP2      | 1.7192068  | 0.00197  |
| NQO1      | 1.4131196  | 0.00197  |
| FKBP1B    | 1.0551127  | 0.00211  |
| ZNF302    | 1.0074737  | 0.00211  |
| WISP3     | 1.5495363  | 0.00212  |
| NELL2     | -1.0804068 | 0.00218  |
| GZMK      | -1.9549967 | 0.00222  |
| RABL3     | 1.1267308  | 0.00222  |
| FCER1A    | -1.3936347 | 0.00223  |
| ACTN4     | 1.0170709  | 0.00228  |
| ST3GAL6   | -1.1012806 | 0.00233  |
| PDE4B     | -1.2495761 | 0.00237  |
| VWF       | -1.0759119 | 0.00238  |
| HGF       | -1.8104294 | 0.00241  |
| MTHFD2    | 1.5174504  | 0.00247  |
| CXCL6     | -2.53738   | 0.00248  |

|           |            |         |
|-----------|------------|---------|
| FCGR1B    | -1.0403178 | 0.00252 |
| AZIN1     | 1.7661471  | 0.00258 |
| CCSER2    | 1.0213127  | 0.00258 |
| PTCH1     | 1.1014722  | 0.00259 |
| CD48      | -1.7779811 | 0.00265 |
| LOC728392 | -1.0104539 | 0.00268 |
| PPFIA4    | 1.0926409  | 0.00269 |
| COL4A3    | 1.0460464  | 0.00271 |
| HMBOX1    | -1.5493617 | 0.00273 |
| TRIB2     | -1.9564979 | 0.00287 |
| WFDC2     | -2.0980757 | 0.00295 |
| KDELR3    | -1.5430078 | 0.00296 |
| ITGB3     | 1.1818129  | 0.00297 |
| PLA2G4A   | -1.0451955 | 0.00297 |
| GOLIM4    | 1.7979332  | 0.00299 |
| TNNC1     | 1.274326   | 0.003   |
| SBSRON    | 1.3019277  | 0.00302 |
| TLR1      | -1.1543403 | 0.00302 |
| CFAP45    | 1.5584278  | 0.00309 |
| EVI2A     | -1.8558202 | 0.00309 |
| LARGE1    | -1.9865429 | 0.00311 |
| EHD3      | 2.3781223  | 0.00318 |
| CD3D      | -1.6813916 | 0.0032  |
| ALDH1A3   | -1.0592253 | 0.00328 |
| IGFBP1    | 2.5771932  | 0.0033  |
| ARHGAP28  | 1.4482649  | 0.00333 |
| CDC42EP2  | 1.0832792  | 0.00334 |
| IRF8      | -1.6469336 | 0.00336 |
| CCL19     | -2.2033535 | 0.00337 |
| TSPAN1    | -1.6310802 | 0.00339 |
| ZNF204P   | 1.1421715  | 0.00339 |
| CHN1      | 1.2176376  | 0.00345 |
| PSIP1     | 1.4377876  | 0.00352 |
| CLU       | -1.6365898 | 0.00354 |
| TAL1      | 1.5128571  | 0.00354 |
| IGFBP3    | -1.0478082 | 0.00356 |
| CSRP1     | 1.3832313  | 0.00357 |
| FNBP1     | 1.2040148  | 0.00357 |
| TYRP1     | 1.6580094  | 0.00358 |
| MARCKS    | -1.3075334 | 0.00359 |
| NELL1     | 2.301639   | 0.00364 |
| RPS6KA1   | -1.0439885 | 0.0037  |
| WASF3     | 1.1437274  | 0.00381 |
| ADAMTSL3  | -1.1124358 | 0.00406 |
| SLC38A1   | -1.2849304 | 0.00414 |
| ACKR1     | -1.1263305 | 0.00415 |
| ACTN1     | -1.1197132 | 0.00415 |
| JCHAIN    | -2.8492388 | 0.00415 |
| TMEM45A   | 1.2176102  | 0.00417 |
| GPR171    | -1.3537147 | 0.00427 |
| DYNC111   | 1.8247573  | 0.00431 |
| TGFBI     | -1.4770664 | 0.00433 |
| MUC1      | -1.3979754 | 0.00435 |
| IGHM      | -3.1314638 | 0.00437 |
| ABCA8     | -1.8723916 | 0.00441 |
| TLE4      | -1.2749522 | 0.00441 |
| SLC48A1   | 1.0043776  | 0.00447 |
| CD44      | -1.690338  | 0.00455 |
| MRC1      | -1.5179538 | 0.00466 |
| CDS2      | -2.1810249 | 0.00483 |
| CCR2      | -1.6970876 | 0.00484 |
| PEA15     | 1.1002323  | 0.00491 |
| PRSS16    | 1.0576455  | 0.00496 |
| SST       | 2.393528   | 0.00499 |
| TMSB15B   | 1.8039833  | 0.00501 |
| FZD2      | 1.7076459  | 0.00502 |
| GADD45A   | 1.159476   | 0.00511 |
| SH2D1A    | -1.1411767 | 0.00511 |
| TNC       | -1.5842087 | 0.00511 |
| CD28      | -1.0969738 | 0.00521 |
| IFI30     | -1.0561632 | 0.00522 |
| SHMT2     | -1.0803068 | 0.00535 |
| NXF3      | 1.2184085  | 0.00541 |
| SFRP1     | -1.7499379 | 0.00545 |
| CD55      | 1.1269028  | 0.00547 |
| EXPH5     | 1.6701269  | 0.00555 |
| HIPK2     | 1.0371101  | 0.0056  |
| ADGRG2    | -1.0958395 | 0.00561 |
| PAMR1     | 1.4187433  | 0.00561 |
| EFNB2     | 1.5486479  | 0.00566 |
| DYRK2     | -1.1766611 | 0.00567 |
| IL7R      | -1.717158  | 0.0058  |
| NNMT      | 1.0615619  | 0.00584 |
| LY86      | -1.3209895 | 0.00587 |
| ZBTB16    | 1.2703184  | 0.00612 |
| RDX       | 1.1030927  | 0.00634 |
| PYCARD    | -1.6310347 | 0.00637 |
| SFRP4     | -1.4774209 | 0.00638 |
| CTSV      | 1.8382807  | 0.00639 |
| TNFRSF11B | -1.4606932 | 0.0064  |

|            |            |         |
|------------|------------|---------|
| ERBB4      | 1.3097646  | 0.00648 |
| CD24       | -1.0411183 | 0.00652 |
| IGF1       | 2.2817603  | 0.00655 |
| SFN        | -1.4930337 | 0.00667 |
| HS3ST1     | -1.3517464 | 0.0067  |
| RG52       | 1.3242587  | 0.00685 |
| TYROBP     | -1.3999233 | 0.00685 |
| RAMP3      | 1.4535522  | 0.00689 |
| RPS6       | -1.0506709 | 0.00689 |
| CMAHP      | 1.5808359  | 0.0069  |
| KRT7       | -1.3570532 | 0.00692 |
| LDB2       | 1.5015745  | 0.00702 |
| CELF2      | -1.0191333 | 0.00707 |
| FKBP11     | -1.0977003 | 0.00714 |
| TIPARP     | 1.311924   | 0.00714 |
| CCL5       | -1.651811  | 0.0072  |
| ITGB8      | 1.5127764  | 0.0072  |
| OPCML      | 1.2584927  | 0.0072  |
| MSR1       | -1.3320422 | 0.00721 |
| ERG        | 1.5370281  | 0.00759 |
| PLTP       | 1.3061504  | 0.0076  |
| SOD2       | 1.2546589  | 0.00763 |
| HLA-DRA    | -1.268823  | 0.00775 |
| PTPRD      | 1.6018999  | 0.00795 |
| UCP2       | -1.5944488 | 0.00808 |
| DACT1      | -1.0701467 | 0.00809 |
| ACTA2      | -1.0764938 | 0.00819 |
| OGDH       | -1.0133872 | 0.00824 |
| INTS12     | 1.073233   | 0.00832 |
| IGHA2      | -4.306195  | 0.00836 |
| G0S2       | 1.004645   | 0.00867 |
| BCL2L2     | 1.0821073  | 0.00872 |
| SPTAN1     | 1.1960569  | 0.00872 |
| PLBD1      | 1.0272294  | 0.00879 |
| SLC22A7    | -1.0193044 | 0.00896 |
| FMO3       | -1.417746  | 0.00917 |
| PAPOLA     | 1.0156111  | 0.00917 |
| RAPGEF4    | 1.2776012  | 0.00936 |
| DHRS3      | 1.1433956  | 0.00963 |
| PODXL      | 2.0371158  | 0.00963 |
| SLC2A10    | 1.0970604  | 0.00966 |
| ATP8A2     | 1.1114408  | 0.00974 |
| GLIPR1     | -1.2153966 | 0.0101  |
| TCN2       | -1.0333133 | 0.0103  |
| CLEC4A     | -1.0819423 | 0.0108  |
| HMBX1      | -1.4356444 | 0.011   |
| ADGRG1     | -1.0416711 | 0.0112  |
| CDH10      | 1.5426796  | 0.0114  |
| NPHS2      | 2.451824   | 0.0114  |
| CKLF       | -1.0324317 | 0.0116  |
| SCARB2     | 1.0429804  | 0.0116  |
| XYLT1      | 1.1462295  | 0.0116  |
| CRHBP      | 1.6523058  | 0.0117  |
| KRT19      | -1.5467573 | 0.0117  |
| TRAF3IP3   | -1.0353346 | 0.0117  |
| TNFAIP8    | -1.2778156 | 0.0118  |
| CAMSAP2    | 1.0376142  | 0.0119  |
| LTB        | -1.8732511 | 0.0124  |
| RRM2       | -1.4059322 | 0.0124  |
| SLC26A4    | 1.0502521  | 0.0124  |
| SYNE3      | 1.0559985  | 0.0124  |
| CASP1      | -1.1735307 | 0.0125  |
| HOPX       | -1.2015644 | 0.0127  |
| AGR2       | -1.4211863 | 0.0128  |
| ENO1       | -1.0934863 | 0.0128  |
| GABRP      | -1.3332538 | 0.0129  |
| GPR18      | -1.5437923 | 0.013   |
| RASGRP1    | -1.3614983 | 0.0135  |
| CSGALNACT2 | 1.0222261  | 0.0136  |
| OLFM4      | -2.0251691 | 0.0137  |
| PLAT       | 2.2206342  | 0.0143  |
| RAB31      | 1.0478802  | 0.0145  |
| PDE4DIP    | -1.2628208 | 0.0151  |
| TES        | -1.1913493 | 0.0151  |
| VCAN       | -1.3740546 | 0.0152  |
| HECA       | 1.4104269  | 0.0154  |
| RYR3       | -1.4813278 | 0.0157  |
| TLR7       | -1.4649836 | 0.0157  |
| VDAC1      | -1.4459078 | 0.0164  |
| COL15A1    | -1.225996  | 0.0166  |
| EIF4B      | 1.0977697  | 0.0168  |
| SLCO2B1    | -1.1655583 | 0.0169  |
| USP2       | 1.4264862  | 0.0169  |
| DOCK2      | -1.1142445 | 0.017   |
| CD8A       | -1.0239541 | 0.0171  |
| RRAS       | 1.2100162  | 0.0171  |
| SGK1       | 1.1904887  | 0.0172  |
| CTSS       | -1.305658  | 0.0176  |
| NFATC1     | 1.2592563  | 0.0178  |
| FCMR       | -1.1594494 | 0.0179  |

|           |            |        |
|-----------|------------|--------|
| LYZ       | -1.6698134 | 0.0182 |
| ATP1A2    | 1.1488037  | 0.0183 |
| HEY1      | 1.2196226  | 0.0187 |
| HBEGF     | 1.3621301  | 0.0189 |
| KIAA0226L | -1.1152359 | 0.019  |
| TIMP3     | 1.0048129  | 0.0191 |
| ETNPPL    | 1.346328   | 0.0192 |
| VIM       | 1.051709   | 0.0195 |
| GPR183    | -1.3113613 | 0.0196 |
| AP1M2     | -1.0255416 | 0.0197 |
| SNORD96A  | -1.0944342 | 0.0198 |
| IL1RL1    | 2.0041698  | 0.0199 |
| PTPRC     | 1.5804647  | 0.0199 |
| RBMS1     | 1.0464652  | 0.0203 |
| MRPS12    | -1.302649  | 0.0204 |
| C4B       | -1.4866422 | 0.021  |
| APOBEC3B  | -1.0372236 | 0.0211 |
| ABLIM1    | -1.1166502 | 0.0218 |
| IGKC      | -3.0566127 | 0.022  |
| RARRES3   | -1.4274752 | 0.0222 |
| ITGBL1    | 1.3286839  | 0.0223 |
| CYP24A1   | -1.5187856 | 0.0224 |
| FBXO3     | 1.0578034  | 0.0225 |
| PLEK      | -1.1203964 | 0.0227 |
| MICAL2    | 1.0650699  | 0.0229 |
| PRR5      | -1.0056908 | 0.0235 |
| NCF1      | -1.0133321 | 0.0236 |
| LAPTM5    | -1.0729902 | 0.0239 |
| ITGA8     | 1.3257912  | 0.0243 |
| DUSP1     | 1.8528308  | 0.0249 |
| MIR8071   | -3.8240161 | 0.025  |
| FBXO21    | 1.08062    | 0.0253 |
| HABP2     | -1.2995777 | 0.0261 |
| TRAF5     | -1.7780299 | 0.0261 |
| EV12B     | -1.5502002 | 0.0263 |
| CDH11     | -1.1772093 | 0.0265 |
| CRIP1     | -1.1780717 | 0.0273 |
| MGLL      | -1.0566274 | 0.0276 |
| HLA-DPA1  | -1.0524992 | 0.0278 |
| PLPP3     | 1.103269   | 0.0278 |
| RAC2      | -1.2650157 | 0.0278 |
| CTSB      | -1.2933474 | 0.028  |
| SOWAHC    | -1.3357863 | 0.028  |
| CETP      | 1.0642775  | 0.0281 |
| SLC16A1   | -1.0804208 | 0.0287 |
| CDH6      | -1.029748  | 0.0289 |
| NR3C2     | 1.1884366  | 0.0289 |
| TGFBR2    | 1.3146572  | 0.0292 |
| ITGA4     | -1.147651  | 0.0297 |
| ZEB1      | 1.2306545  | 0.0299 |
| REG1A     | -1.7182761 | 0.0304 |
| ENPEP     | 1.2527255  | 0.0313 |
| C1QTNF3   | -1.0040455 | 0.0318 |
| DUSP7     | 1.1812477  | 0.0321 |
| RPLP0     | -1.4499236 | 0.0322 |
| AKR1B10   | -1.8463016 | 0.0328 |
| TUBA1B    | -1.1288015 | 0.0328 |
| ALDH1A1   | -1.4823402 | 0.0331 |
| ISG20     | -1.0538028 | 0.0332 |
| PTPRB     | 1.3822188  | 0.0336 |
| KDR       | 1.2563793  | 0.0338 |
| IGLC1     | -3.160036  | 0.034  |
| SLC6A8    | -1.0904495 | 0.0345 |
| ADGRF5    | 1.1787189  | 0.0346 |
| CHL1      | -1.2113345 | 0.0347 |
| EGF       | 1.3401241  | 0.0351 |
| HPGD      | 1.4169641  | 0.0355 |
| TAGLN     | -1.4823788 | 0.0357 |
| PPIB      | -1.0597155 | 0.0359 |
| RG57      | 1.1138696  | 0.0359 |
| RPS5      | -1.0750495 | 0.0391 |
| TEK       | 1.066326   | 0.0402 |
| IGLV1     | -3.6065807 | 0.042  |
| PROM1     | -1.3278867 | 0.0437 |
| MPDZ      | 1.1808935  | 0.0442 |
| OGDHL     | -1.1196826 | 0.0447 |
| CYAT1     | -2.7758306 | 0.0452 |
| TAC1      | -1.8867432 | 0.0452 |
| SLC22A2   | -1.0715499 | 0.0455 |
| ALOX5     | -1.7472621 | 0.0461 |
| SLC4A4    | -1.1602565 | 0.0461 |
| NEU1      | -1.0810841 | 0.0469 |
| IGK       | -1.774711  | 0.0475 |
| NFIB      | -1.284242  | 0.048  |
| CAPN3     | -1.2157413 | 0.0488 |
