# Supplementary material for: A systematic integrative approach reveals novel microRNAs in diabetic nephropathy
Source: PubMed Central journal article supplement — J Res Med Sci. 2020 Jan 20;25:1. doi: 10.4103/jrms.JRMS_289_19 (PMC7003547; doi:10.4103/jrms.jrms_289_19), 2020-01-20
Supplement: JRMS-25-1_Suppl2.pdf [file JRMS-25-1_Suppl2.pdf]

|          |            |          |
|----------|------------|----------|
| MKRN1    | -1.1207135 | 0.002042 |
| NR3C1    | -1.1543023 | 0.002058 |
| PER1     | 1.1472892  | 0.002058 |
| TNIK     | -1.554391  | 0.002059 |
| HSP90AB1 | -2.2811433 | 0.002105 |
| RARRES1  | -2.4146479 | 0.002154 |
| SOD2     | -2.4624418 | 0.002256 |
| CASP1    | -1.710655  | 0.002295 |
| SRP72    | -1.7736261 | 0.002295 |
| RPS6KC1  | -1.342044  | 0.002296 |
| SLC26A2  | -2.0726845 | 0.002388 |
| TCAF1    | -1.3359639 | 0.002393 |
| YLP1M1   | -1.5950206 | 0.002393 |
| TRAM1    | -1.5011193 | 0.002439 |
| ANKLE2   | -1.2837696 | 0.002484 |
| NCOA3    | -1.4419019 | 0.002566 |
| IGLC1    | -3.9603122 | 0.002578 |
| STS      | -1.5338199 | 0.002578 |
| BAZ1A    | -1.1815157 | 0.002613 |
| FGF13    | -1.7966539 | 0.002613 |
| TNFAIP8  | -2.533184  | 0.002613 |
| IGFALS   | 1.0159113  | 0.002703 |
| WIPF1    | -1.4032351 | 0.002703 |
| KIAA0368 | -1.9035898 | 0.002706 |
| ARHGAP12 | -1.4352409 | 0.002774 |
| RAB3GAP1 | -1.5283786 | 0.002868 |
| ETV1     | -1.7964073 | 0.002887 |
| LAMB1    | -1.6292665 | 0.002936 |
| LPGAT1   | -1.9563161 | 0.002936 |
| GOLIM4   | 1.0640358  | 0.002938 |
| HTATIP2  | -1.1475225 | 0.002943 |
| PDLIM5   | -1.8912222 | 0.002943 |
| PXDN     | -2.0173965 | 0.002943 |
| RPA1     | -1.7495263 | 0.003072 |
| SCRN1    | -1.5611008 | 0.003115 |
| EP400    | -1.2904337 | 0.003176 |
| IGKC     | -2.6543886 | 0.003176 |
| ENAH     | -1.3399303 | 0.003184 |
| IFNGR1   | -2.0932827 | 0.003193 |
| ABI1     | -1.2615931 | 0.003234 |
| BRD7     | -1.4844849 | 0.003234 |
| GRIP2    | 1.0437909  | 0.003234 |
| PHACTR2  | -1.4635497 | 0.003234 |
| ATRX     | -1.8941633 | 0.003246 |
| C5orf22  | -1.2885143 | 0.003277 |
| FAS      | -1.1739061 | 0.003277 |
| IGLV1-44 | -3.1583306 | 0.003277 |
| MSH2     | -1.2734072 | 0.003277 |
| TNFAIP8  | -2.2662957 | 0.003277 |
| ASCC3    | -1.0299833 | 0.003332 |
| COL4A1   | -1.5658965 | 0.003458 |
| DERL1    | -1.9590601 | 0.003488 |
| MTF2     | -1.1991889 | 0.003488 |
| TFPI2    | -3.5772902 | 0.003488 |
| DDX60    | -1.4795062 | 0.003499 |
| DNAJC10  | -1.2727258 | 0.003499 |
| KPNA1    | -1.0292844 | 0.003499 |
| TM9SF2   | -1.5902    | 0.003499 |
| EFHC1    | -1.1722652 | 0.003523 |
| SOD2     | -1.7836419 | 0.00357  |
| FZD7     | -1.4775041 | 0.003615 |
| HLA-DQB1 | -1.2327299 | 0.003643 |
| COL4A1   | -2.4442927 | 0.003695 |
| RASA1    | -2.0939454 | 0.003695 |
| C2CD2    | -1.0322745 | 0.003701 |
| EXT2     | -1.0595713 | 0.003701 |
| FAS      | -1.6372955 | 0.003701 |
| FSTL1    | -1.8041537 | 0.003701 |
| NROB2    | 1.2841215  | 0.003701 |
| SNW1     | -1.4709982 | 0.003701 |
| TP53BP2  | -1.122633  | 0.003701 |
| USP6NL   | -1.1978489 | 0.003701 |
| NCK1     | -1.2009558 | 0.003708 |
| SGPL1    | -1.2674334 | 0.003708 |
| TRRAP    | -1.3102026 | 0.003708 |
| CKAP2    | -1.2773616 | 0.003736 |
| TMCC1    | -1.2381981 | 0.003736 |
| LAPTM5   | -2.8493789 | 0.003766 |
| MGAT2    | -1.6072141 | 0.003799 |
| UBE2V1   | -1.0104352 | 0.003799 |
| SQLE     | -1.9177182 | 0.003815 |
| ST3GAL4  | 1.0091257  | 0.003815 |
| CDH6     | -2.3375857 | 0.003818 |
| CDH6     | -2.5261102 | 0.003818 |

|       |             |
|-------|-------------|
| SMRT  | 0.030282205 |
| GATA3 | 0.030282205 |
| AR    | 0.030282205 |
| FOXA1 | 0.030282205 |
| STAT3 | 0.033003209 |
| CBP   | 0.033387272 |
| E2F1  | 0.034035532 |
| ELF5  | 0.036080102 |
| CEBPB | 0.037480131 |
| KDM2B | 0.037480131 |
| TAL1  | 0.047544294 |
| SOX2  | 0.047544294 |
| NANOG | 0.047544294 |

|          |             |
|----------|-------------|
| TNK2     | 0.025711951 |
| SRC      | 0.026886698 |
| IRAK1    | 0.030907673 |
| RPS6KA4  | 0.030907673 |
| ATR      | 0.032476878 |
| MAPKAPK5 | 0.035299734 |
| MARK3    | 0.035299734 |
| RAF1     | 0.035299734 |
| FGFR3    | 0.039281051 |
| GRK5     | 0.039281051 |
| PAK4     | 0.039281051 |
| VRK1     | 0.039281051 |
| MAP2K2   | 0.044318551 |
| MAP3K7   | 0.048697468 |
| MTOR     | 0.049693857 |

|                  |             |
|------------------|-------------|
| hsa-miR-4759     | 5.49599E-07 |
| hsa-miR-4506     | 5.65782E-07 |
| hsa-miR-3659     | 6.07725E-07 |
| hsa-miR-219-1-3p | 6.41183E-07 |
| hsa-miR-486-5p   | 6.73612E-07 |
| hsa-miR-4694-5p  | 8.96077E-07 |
| hsa-miR-4764-3p  | 1.03671E-06 |
| hsa-miR-2964a-5p | 1.09812E-06 |
| hsa-miR-556-5p   | 1.24665E-06 |
| hsa-miR-3681     | 1.48798E-06 |
| hsa-miR-3200-3p  | 2.38305E-06 |
| hsa-miR-3651     | 2.99767E-06 |
| hsa-miR-4798-3p  | 3.30638E-06 |
| hsa-miR-3935     | 3.63409E-06 |
| hsa-miR-4460     | 3.75308E-06 |
| hsa-miR-648      | 3.90318E-06 |
| hsa-miR-591      | 6.97592E-06 |
| hsa-miR-4718     | 9.89148E-06 |
| hsa-miR-3162-3p  | 1.18534E-05 |
| hsa-miR-3150a-5p | 1.51929E-05 |
| hsa-miR-3150b-5p | 1.51929E-05 |
| hsa-miR-4714-3p  | 1.76931E-05 |
| hsa-miR-3529     | 2.9721E-05  |
| hsa-miR-379      | 2.9721E-05  |
| hsa-miR-4327     | 3.61261E-05 |
| hsa-miR-4772-5p  | 3.96642E-05 |
| hsa-miR-1225-5p  | 4.59659E-05 |
| hsa-miR-4540     | 4.59659E-05 |
| hsa-miR-487b     | 5.14489E-05 |
| hsa-miR-548ad    | 5.32653E-05 |
| hsa-miR-503      | 5.50197E-05 |
| hsa-miR-4317     | 5.88722E-05 |
| hsa-miR-196a     | 6.0686E-05  |
| hsa-miR-196b     | 6.0686E-05  |
| hsa-miR-521      | 6.75045E-05 |
| hsa-miR-660      | 7.79883E-05 |
| hsa-miR-598      | 8.66712E-05 |
| hsa-miR-192      | 8.94641E-05 |
| hsa-miR-215      | 8.94641E-05 |
| hsa-miR-103b     | 0.000111952 |
| hsa-miR-1537     | 0.0002122   |
| hsa-miR-621      | 0.000215894 |
| hsa-miR-553      | 0.000264535 |
| hsa-miR-509-3p   | 0.000411486 |
| hsa-miR-2277-3p  | 0.000420543 |
| hsa-miR-4715-5p  | 0.000420543 |
| hsa-miR-3622a-5p | 0.000492901 |
| hsa-miR-3115     | 0.000656993 |
| hsa-miR-3676     | 0.000699021 |
| hsa-miR-1468     | 0.000745862 |
| hsa-miR-4535     | 0.001272939 |
| hsa-miR-515-3p   | 0.001272939 |
| hsa-miR-519e     | 0.001272939 |
| hsa-miR-518a-3p  | 0.001352676 |
| hsa-miR-518b     | 0.001352676 |
| hsa-miR-518c     | 0.001352676 |
| hsa-miR-518d-3p  | 0.001352676 |
| hsa-miR-518f     | 0.001352676 |
| hsa-miR-4798-5p  | 0.001380385 |
| hsa-miR-645      | 0.001656201 |
| hsa-miR-574-3p   | 0.001908993 |
| hsa-miR-4757-3p  | 0.001954518 |
| hsa-miR-4681     | 0.00224857  |
| hsa-miR-4727-3p  | 0.002468567 |
| hsa-miR-887      | 0.002610449 |
| hsa-miR-601      | 0.002727583 |
| hsa-miR-4790-5p  | 0.004493188 |
| hsa-miR-554      | 0.004568489 |
| hsa-miR-4661-3p  | 0.004763655 |
| hsa-miR-95       | 0.004763655 |
| hsa-miR-191      | 0.0049528   |
| hsa-miR-3619-3p  | 0.005249411 |
| hsa-miR-296-3p   | 0.006325071 |
| hsa-miR-3669     | 0.007164017 |
| hsa-miR-3132     | 0.007246985 |
| hsa-miR-4304     | 0.007307581 |
| hsa-miR-933      | 0.007312331 |
| hsa-miR-3610     | 0.007338543 |
| hsa-miR-4732-5p  | 0.007410139 |
| hsa-miR-324-5p   | 0.007835105 |
| hsa-miR-2909     | 0.008315483 |
| hsa-miR-4776-5p  | 0.009342834 |
| hsa-miR-548al    | 0.009912229 |
| hsa-miR-4462     | 0.011939341 |

|          |            |          |
|----------|------------|----------|
| CSTF3    | -1.0304966 | 0.003818 |
| COL3A1   | -2.9052288 | 0.003826 |
| HLA-DPA1 | -2.1926953 | 0.003826 |
| HLA-DQB1 | -1.9882949 | 0.003826 |
| IFI44    | -1.6946685 | 0.003826 |
| RTN3     | -1.5048064 | 0.003826 |
| TCF15    | 1.1709654  | 0.003826 |
| EIF5B    | -1.3368874 | 0.003829 |
| ATP5I    | 1.1651863  | 0.004019 |
| LRIG1    | -1.5600197 | 0.004019 |
| VCAN     | -2.7609037 | 0.004019 |
| GNB1     | -1.3399615 | 0.00402  |
| NBPF20   | -1.1409226 | 0.00402  |
| QKI      | -1.1425801 | 0.00402  |
| SOX9     | -2.1467801 | 0.00402  |
| PROM1    | -3.4105509 | 0.004075 |
| SIRT2    | 1.0081186  | 0.004075 |
| ASPH     | -1.7553268 | 0.004091 |
| AAMDC    | 1.1809461  | 0.004105 |
| PCGF2    | 1.0549046  | 0.004105 |
| PAXIP1   | -1.1918911 | 0.00415  |
| MEX3C    | -1.6166057 | 0.004186 |
| SOD2     | -1.2640874 | 0.004186 |
| ABHD2    | -1.1919399 | 0.004221 |
| AGRN     | 1.0818153  | 0.004221 |
| EFNB2    | -1.7018984 | 0.004221 |
| LTF      | -4.3511634 | 0.004221 |
| MSH6     | -1.3986713 | 0.004221 |
| TASP1    | -1.3443737 | 0.004221 |
| ZNF318   | -1.229267  | 0.004221 |
| ANOS1    | -1.0627738 | 0.004225 |
| BICC1    | -1.4286288 | 0.004233 |
| DENND4C  | -1.3522945 | 0.004233 |
| DRAM1    | -1.0889916 | 0.004233 |
| LDLRAD4  | -1.4704929 | 0.004233 |
| PRDM10   | -1.3218962 | 0.004233 |
| CASP8AP2 | -1.5163569 | 0.004247 |
| CCR2     | -2.2408509 | 0.004247 |
| CLU      | -2.3690171 | 0.004247 |
| NLGN4X   | -1.5000929 | 0.004247 |
| POLE3    | -1.5174736 | 0.004247 |
| VCAN     | -3.0887511 | 0.004247 |
| BBX      | -1.317699  | 0.004251 |
| GALNT1   | -1.2338616 | 0.004251 |
| IL7      | -1.3521431 | 0.004251 |
| MAP4K4   | -1.3313923 | 0.004251 |
| TPM1     | -1.5192387 | 0.004251 |
| RBMS1    | -1.1986506 | 0.004267 |
| IL13RA1  | -1.1462428 | 0.004302 |
| ANXA1    | -2.6029907 | 0.004326 |
| SYNJ2    | 1.1121926  | 0.004326 |
| NOTCH2   | -1.1164455 | 0.004344 |
| PDIA3    | -1.4027553 | 0.004358 |
| MAP4K5   | -1.1740376 | 0.004398 |
| NAP1L1   | -1.6637267 | 0.004398 |
| NDUFA3   | 1.2547464  | 0.004398 |
| PLEKHA1  | -1.2918192 | 0.004398 |
| PSMB9    | -1.5363108 | 0.004398 |
| CLU      | -2.287526  | 0.004408 |
| GNAI3    | -1.1735626 | 0.004408 |
| MYC      | -1.3255225 | 0.004408 |
| PTPRF    | -1.3333171 | 0.004408 |
| EVI2B    | -2.8154097 | 0.004418 |
| NBEA     | -1.1783863 | 0.004418 |
| RRN3     | -1.198558  | 0.004418 |
| VCAN     | -3.6673386 | 0.004418 |
| CLTB     | 1.0382288  | 0.004432 |
| PDLIM5   | -1.065412  | 0.004451 |
| MS4A4A   | -2.5541579 | 0.004488 |
| GNAQ     | -1.1163732 | 0.004498 |
| BET1     | -1.5649281 | 0.004545 |
| FZD1     | -1.6800727 | 0.004565 |
| RAD17    | -1.1211813 | 0.004565 |
| SPTLC2   | -1.2143966 | 0.004565 |
| RPAP3    | -1.4921514 | 0.004647 |
| ZNF358   | 1.0568887  | 0.004667 |
| ANXA2    | -1.7654334 | 0.004668 |
| ATM      | -1.1003776 | 0.004668 |
| DNAJC10  | -1.1708588 | 0.004668 |
| ELK3     | -1.9812509 | 0.004668 |
| RBM12    | -1.4742264 | 0.004668 |
| TMEM248  | -1.2518775 | 0.004699 |
| MBTPS1   | -1.1863476 | 0.004847 |
| KIF2A    | -1.3202984 | 0.004912 |

|                 |             |
|-----------------|-------------|
| hsa-miR-4315    | 0.012987005 |
| hsa-miR-3655    | 0.013039286 |
| hsa-miR-891a    | 0.013241865 |
| hsa-miR-518e    | 0.014399796 |
| hsa-miR-100     | 0.015632382 |
| hsa-miR-99a     | 0.015632382 |
| hsa-miR-99b     | 0.015632382 |
| hsa-miR-337-5p  | 0.022830889 |
| hsa-miR-517a    | 0.026671236 |
| hsa-miR-517c    | 0.026671236 |
| hsa-miR-718     | 0.029138971 |
| hsa-miR-4636    | 0.031056999 |
| hsa-miR-4671-5p | 0.031706829 |
| hsa-miR-4278    | 0.035284322 |
| hsa-miR-1306    | 0.035521944 |
| hsa-miR-4259    | 0.04239058  |
| hsa-miR-451     | 0.043732795 |
| hsa-miR-1282    | 0.04438888  |
| hsa-miR-3186-3p | 0.045323345 |
| hsa-miR-1277    | 0.049572582 |

|          |            |          |
|----------|------------|----------|
| ATP13A3  | -1.2793751 | 0.004914 |
| C3       | -3.1408763 | 0.004914 |
| CFB      | -2.423689  | 0.004914 |
| CYB5R4   | -1.4167851 | 0.004914 |
| DDIT3    | 1.1207535  | 0.004914 |
| FZD7     | -2.071564  | 0.004914 |
| GINS1    | -1.2053685 | 0.004914 |
| HMGN4    | -1.1921984 | 0.004914 |
| HNRNPA3  | -1.1089458 | 0.004914 |
| HRG      | 1.0459043  | 0.004914 |
| MYOF     | -1.9283448 | 0.004914 |
| PAIP1    | -1.2711274 | 0.004914 |
| SNAPC2   | 1.0280098  | 0.004914 |
| SOX4     | -2.9459023 | 0.004914 |
| SSR1     | -1.3226499 | 0.004914 |
| ANXA5    | -1.6699248 | 0.00498  |
| CDK16    | 1.0549444  | 0.00498  |
| CTSS     | -1.9748457 | 0.00498  |
| PSD3     | -1.7874647 | 0.00498  |
| MAGI2    | 1.0156313  | 0.005013 |
| ANXA2    | -1.7335437 | 0.005063 |
| ZZZ3     | -1.2115266 | 0.005066 |
| PON2     | -2.2221447 | 0.005099 |
| CXADR    | -1.6783224 | 0.00512  |
| DVL3     | -1.3271026 | 0.00512  |
| HLA-DRA  | -1.9208184 | 0.00512  |
| TJUSC3   | -1.8466014 | 0.00512  |
| IKBKB    | -1.1754668 | 0.005156 |
| PRKRA    | -1.4446224 | 0.005156 |
| FOLR3    | 1.0610039  | 0.005166 |
| ARFGAP3  | -1.7584924 | 0.005178 |
| SPHAR    | -1.3430613 | 0.005178 |
| MYOF     | -1.3552782 | 0.005207 |
| RANBP2   | -1.3008973 | 0.005207 |
| LAMC1    | -1.1735804 | 0.005217 |
| NENF     | 1.1807659  | 0.005239 |
| PER1     | 1.177247   | 0.005281 |
| SMC3     | -1.3532494 | 0.005281 |
| SLC2A10  | -1.6338125 | 0.005423 |
| CASP1    | -1.4301758 | 0.005483 |
| RBMS1    | -1.6353907 | 0.005483 |
| TBK1     | -1.0978664 | 0.005483 |
| STAT1    | -1.3621824 | 0.005513 |
| CEP350   | -1.444141  | 0.005526 |
| DSE      | -1.5373786 | 0.005526 |
| MED17    | -1.4090344 | 0.005526 |
| AP1S1    | 1.0735405  | 0.005539 |
| COX7A1   | 1.6916444  | 0.005539 |
| CSNK1A1  | -1.1774084 | 0.005539 |
| GALNT1   | -1.2670865 | 0.005539 |
| GNG12    | -1.2888948 | 0.005539 |
| KDEL2    | -1.1078277 | 0.005539 |
| MSN      | -1.1145142 | 0.005539 |
| NR4A3    | 2.041651   | 0.005539 |
| PLAA     | -1.3857828 | 0.005539 |
| SKAP2    | -1.7019233 | 0.005539 |
| TMEM131  | -1.7450419 | 0.005539 |
| ZNF107   | -1.0834558 | 0.005539 |
| C1RL     | -1.3616414 | 0.005637 |
| CDC16    | -1.7830181 | 0.005637 |
| COL1A2   | -2.764819  | 0.005637 |
| IQGAP1   | -1.4468699 | 0.005637 |
| KDEL2    | -1.4044016 | 0.005637 |
| M6PR     | -1.4471719 | 0.005637 |
| RBMS1    | -1.2190204 | 0.005637 |
| TNFAIP2  | -1.4481708 | 0.005637 |
| TUG1     | -1.0486557 | 0.005637 |
| YBX3     | -1.2190701 | 0.005637 |
| HLA-DQB1 | -1.0378039 | 0.005684 |
| ABLIM1   | -1.274267  | 0.005705 |
| ALG6     | -1.3933629 | 0.005705 |
| APMAP    | -1.027042  | 0.005705 |
| CPD      | -1.2128198 | 0.005705 |
| EVI2A    | -2.5280018 | 0.005705 |
| FN1      | -2.1084994 | 0.005705 |
| HDAC9    | -1.1069942 | 0.005705 |
| HNRNPAB  | -1.0222011 | 0.005705 |
| NFIB     | -1.7048008 | 0.005705 |
| PAWR     | -1.3958475 | 0.005705 |
| POLR2L   | 1.2014494  | 0.005705 |
| PUM1     | -1.0633169 | 0.005705 |
| RUNX1    | -1.9327405 | 0.005705 |
| SFPQ     | -1.2557172 | 0.005705 |
| SSH1     | -1.4176953 | 0.005705 |

|          |            |          |
|----------|------------|----------|
| TAF1A    | -1.0326662 | 0.005705 |
| TNFSF10  | -1.2618608 | 0.005705 |
| TTBK2    | -1.1031209 | 0.005705 |
| ANXA2    | -1.6946142 | 0.005709 |
| MMD      | -1.3218421 | 0.005709 |
| GALNT7   | -1.3935073 | 0.005724 |
| CCNI     | -1.3309707 | 0.005732 |
| SMAD4    | -1.5071827 | 0.005732 |
| TROVE2   | -1.6666811 | 0.005732 |
| URI1     | -1.5563243 | 0.005732 |
| ZNF131   | -1.1959265 | 0.005732 |
| PHACTR2  | -1.6688299 | 0.005775 |
| RBM5     | -1.0440871 | 0.005803 |
| ATP9A    | -1.3040044 | 0.005807 |
| FN1      | -2.436414  | 0.005807 |
| PRPF40A  | -1.3275377 | 0.005807 |
| TNC      | -2.8228335 | 0.005808 |
| QTRT2    | -1.08895   | 0.005811 |
| TPBG     | -1.5928202 | 0.005811 |
| PKN2     | -1.184844  | 0.005846 |
| DEGS1    | -1.36099   | 0.005853 |
| SRR      | -1.0563722 | 0.005856 |
| TSR1     | -1.2404202 | 0.005856 |
| BUB3     | -1.257017  | 0.005919 |
| KLK1     | 1.3456089  | 0.005919 |
| PSMB8    | -1.2173857 | 0.005919 |
| PTBP3    | -1.552453  | 0.005919 |
| PSD3     | -1.4544486 | 0.005952 |
| HEATR1   | -1.1804477 | 0.005963 |
| TRAF3    | -1.3329736 | 0.006064 |
| HMG20A   | -1.6154884 | 0.006101 |
| ADAM10   | -1.3109197 | 0.006108 |
| APOBEC3G | 1.0315206  | 0.006113 |
| TRIM16   | -1.0160515 | 0.006129 |
| MNDA     | -1.7723864 | 0.006156 |
| FZD6     | -1.6123121 | 0.006168 |
| B4GALT5  | -1.5443779 | 0.006177 |
| SPATA2L  | 1.3458935  | 0.006177 |
| ITGAM    | -1.5537522 | 0.006181 |
| ZDHHC13  | -1.15111   | 0.006181 |
| SRPK2    | -1.245201  | 0.006202 |
| CCNB1    | -1.2008196 | 0.006222 |
| CFHR1    | -1.7886084 | 0.006254 |
| EPRS     | -1.228715  | 0.006254 |
| MALT1    | -1.6486401 | 0.006254 |
| NHLRC2   | -1.2235481 | 0.006254 |
| SACS     | -1.2313413 | 0.006254 |
| SULF1    | -2.1191937 | 0.006254 |
| TPM1     | -1.9796307 | 0.006263 |
| YWHAH    | -1.3470866 | 0.006314 |
| IFIT5    | -1.0535031 | 0.006317 |
| ATP5I    | 1.1166399  | 0.006328 |
| BIRC3    | -1.6286506 | 0.006328 |
| FGL2     | -1.6045764 | 0.006328 |
| RAB11A   | -2.1541259 | 0.006328 |
| UGCG     | -1.5818821 | 0.006328 |
| WNT10B   | 1.0187435  | 0.006328 |
| SEC23IP  | -1.4487649 | 0.006341 |
| SEL1L3   | -1.7424275 | 0.006345 |
| ZBTB1    | -1.592608  | 0.006345 |
| CX3CR1   | -2.0349915 | 0.006362 |
| NAA15    | -1.3492111 | 0.006362 |
| PRKD3    | -1.5622909 | 0.006362 |
| ARID5B   | -1.5200925 | 0.006381 |
| FN1      | -2.0939395 | 0.006431 |
| PUDP     | -1.1416004 | 0.006438 |
| DCTD     | -1.3808743 | 0.006496 |
| SIRT1    | -1.0607742 | 0.006534 |
| HLA-B    | -1.6848163 | 0.006544 |
| PAPSS1   | -1.2297633 | 0.006561 |
| RALGAPB  | -1.1377409 | 0.006561 |
| RAP2B    | -1.4420378 | 0.006561 |
| PSMA1    | -1.709647  | 0.00658  |
| COL3A1   | -2.5127295 | 0.006596 |
| HIPK1    | -1.3330229 | 0.006622 |
| SMCHD1   | -1.2623305 | 0.006622 |
| RRM2     | -1.8129194 | 0.006629 |
| ZCCHC10  | -1.2707838 | 0.006681 |
| CROCC    | 1.1730212  | 0.006688 |
| CD44     | -2.6993298 | 0.006695 |
| DNP1     | 1.2357095  | 0.006745 |
| FARS2    | -1.2389393 | 0.006769 |
| DEFB1    | 1.2354244  | 0.006782 |
| DDX3X    | -1.9996892 | 0.006794 |

|           |            |          |
|-----------|------------|----------|
| EIF3J     | -1.357911  | 0.006807 |
| CSF2RB    | -2.1305275 | 0.006808 |
| ITGAV     | -1.5081409 | 0.006808 |
| NID1      | -1.4554593 | 0.006808 |
| U2AF2     | 1.0513799  | 0.006808 |
| ZNF200    | -1.0876414 | 0.006808 |
| ATIC      | -1.0338532 | 0.006856 |
| AVL9      | -1.180938  | 0.006871 |
| IRF8      | -1.7174632 | 0.006871 |
| KLHL24    | -1.0239175 | 0.006871 |
| MRFAP1L1  | -1.5424922 | 0.006871 |
| RAB11FIP1 | -1.1634372 | 0.006871 |
| NOTCH2    | -1.0854867 | 0.006917 |
| CD48      | -1.5661979 | 0.006921 |
| C1S       | -2.1765043 | 0.006926 |
| PALB2     | -1.179744  | 0.006926 |
| TMEM50A   | -1.4848513 | 0.006926 |
| FN1       | -2.4395885 | 0.00695  |
| KIAA0101  | -1.315927  | 0.006958 |
| CLEC2B    | -1.9313148 | 0.006985 |
| COL15A1   | -2.1924701 | 0.006985 |
| CXCL12    | -1.2013195 | 0.006997 |
| ADSS      | -1.5598338 | 0.006999 |
| CASP3     | -1.187606  | 0.006999 |
| FCHSD2    | -1.2809911 | 0.006999 |
| MAP7D3    | -1.0516693 | 0.006999 |
| PRKY      | -1.7027667 | 0.006999 |
| VIM       | -2.9831006 | 0.007011 |
| POGK      | -1.3733048 | 0.007012 |
| SRSF1     | -1.4540304 | 0.007012 |
| UBE2J1    | -1.7848481 | 0.007012 |
| ITGB1     | -1.0624122 | 0.00702  |
| FBXO11    | -1.1981062 | 0.007026 |
| SLAH1     | -1.1679656 | 0.007055 |
| GORASP2   | -1.1475398 | 0.007058 |
| PPP1R12A  | -1.2417067 | 0.007058 |
| MAP4K5    | -1.3047859 | 0.007063 |
| PXDN      | -1.6436633 | 0.007077 |
| ZEB2      | -2.0279591 | 0.007077 |
| CCND2     | -1.7610559 | 0.007084 |
| CD2AP     | -1.4722767 | 0.007125 |
| FEM1B     | -1.3828842 | 0.007194 |
| QRICH1    | -1.0373424 | 0.007203 |
| STAT1     | -1.394954  | 0.007249 |
| ARCN1     | -1.5403624 | 0.007284 |
| TUBB      | -1.3895633 | 0.007284 |
| VCAM1     | -1.6855472 | 0.007284 |
| HLA-C     | -1.4471493 | 0.007286 |
| TRIP12    | -1.3059831 | 0.007286 |
| ALG9      | -1.2028084 | 0.007332 |
| R3HDM4    | -1.0084648 | 0.007332 |
| MGEA5     | -1.2551124 | 0.007353 |
| PDS5A     | -1.0496866 | 0.007455 |
| ARFIP1    | -1.0800281 | 0.007497 |
| NAA35     | -1.4518323 | 0.007497 |
| SMCHD1    | -1.3893838 | 0.007497 |
| HS3ST1    | -2.0764323 | 0.007533 |
| OSTM1     | -1.2868462 | 0.007533 |
| DOCK9     | -1.2642189 | 0.007714 |
| CDH11     | -1.9365953 | 0.007718 |
| RCOR1     | -1.565474  | 0.007727 |
| GUCY1A3   | -1.5097861 | 0.007776 |
| CDC27     | -1.092665  | 0.007793 |
| IFI16     | -2.2787684 | 0.007798 |
| B2M       | -2.3413247 | 0.007831 |
| TUSC3     | -1.8505448 | 0.007853 |
| AZIN1     | -1.1087117 | 0.007883 |
| CD163     | -1.8839474 | 0.007883 |
| GDI2      | -1.3320048 | 0.007883 |
| SMC6      | -1.1057585 | 0.007883 |
| SP100     | -1.2628165 | 0.007924 |
| NAE1      | -1.616255  | 0.008024 |
| PPM1H     | -1.1678501 | 0.008083 |
| ARL4C     | -1.7905811 | 0.00816  |
| GZMA      | -1.9834833 | 0.00816  |
| HSP90B1   | -1.6308301 | 0.00816  |
| RABEP2    | 1.0056612  | 0.00816  |
| HSPA13    | -1.2092927 | 0.008174 |
| TNIK      | -1.1605763 | 0.008174 |
| SSPN      | -1.1649085 | 0.008407 |
| MSL1      | -1.1464041 | 0.008457 |
| XRCC5     | -1.0695491 | 0.008457 |
| C19orf60  | 1.0181034  | 0.008461 |
| CD53      | -1.8380666 | 0.008461 |

|           |            |          |
|-----------|------------|----------|
| C21orf2   | 1.0308277  | 0.008487 |
| PGM3      | -1.0746917 | 0.008487 |
| PTPRC     | -2.1144381 | 0.008487 |
| SLC44A4   | -1.3328747 | 0.008487 |
| SPRY1     | -1.6322725 | 0.008487 |
| USP14     | -1.0355966 | 0.008487 |
| RB1       | -1.5087975 | 0.008528 |
| FYB       | -1.1882398 | 0.008538 |
| HRG       | 2.2972219  | 0.008538 |
| GNL3      | -1.216233  | 0.008574 |
| PDIA5     | -1.1084264 | 0.008574 |
| PRKDC     | -1.1900777 | 0.008574 |
| NSMAF     | -1.1536123 | 0.008633 |
| PLSCR1    | -1.625129  | 0.008633 |
| NELL1     | 1.1329452  | 0.008642 |
| SOAT1     | -1.3363721 | 0.008651 |
| FBXW2     | -2.0827857 | 0.008692 |
| MED1      | -1.1425376 | 0.008736 |
| AGR2      | -1.7662155 | 0.00875  |
| ATRN      | -1.0075905 | 0.00875  |
| CRISPLD2  | -1.9775611 | 0.00875  |
| DHX15     | -2.1035322 | 0.00875  |
| FARP1     | -1.0859163 | 0.00875  |
| FEM1B     | -1.3862659 | 0.00875  |
| GLS       | -1.3503548 | 0.00875  |
| KDM5B     | -1.0621252 | 0.00875  |
| LIMA1     | -1.438749  | 0.00875  |
| LYN       | -1.7765406 | 0.00875  |
| NUP205    | -1.0574538 | 0.00875  |
| PJA2      | -1.0400474 | 0.00875  |
| RAB11FIP2 | -1.4604329 | 0.00875  |
| REG1A     | -1.5428275 | 0.00875  |
| SLAMF8    | -1.3271393 | 0.00875  |
| TGFBR2    | -1.8351857 | 0.00875  |
| FNTA      | -1.7336557 | 0.008752 |
| MPHOSPH8  | -1.5019837 | 0.008752 |
| SOX15     | 1.0468598  | 0.008752 |
| TLR3      | -1.0942847 | 0.008752 |
| TXNRD1    | -1.1613793 | 0.008752 |
| HLA-G     | -1.1986728 | 0.00881  |
| LPIN2     | -1.2972713 | 0.00881  |
| PALM2     | -1.3812729 | 0.00881  |
| PPP2R5C   | -1.2361474 | 0.00881  |
| RBP4      | 1.6012037  | 0.00881  |
| RABL2A    | -1.4360136 | 0.008819 |
| CLIP1     | -1.0159137 | 0.00887  |
| TLR1      | -1.5025629 | 0.00887  |
| ZNF217    | -1.4323311 | 0.00887  |
| ITGA4     | -1.5519591 | 0.008908 |
| IFI16     | -1.9999076 | 0.008916 |
| KLF11     | -1.2220858 | 0.008916 |
| HLA-C     | -1.4799224 | 0.008937 |
| PTP4A2    | -1.087125  | 0.008937 |
| PTP4A2    | -1.8390336 | 0.009036 |
| DCTD      | -1.3971633 | 0.009064 |
| DPY19L1   | -1.0422337 | 0.009064 |
| GNPTAB    | -1.2795845 | 0.009064 |
| KIFAP3    | -1.2582366 | 0.009064 |
| OSBPL10   | -1.0973392 | 0.009064 |
| SELT      | -1.4025065 | 0.009064 |
| PAIP1     | -1.0431018 | 0.009141 |
| PNMAL1    | -1.2303809 | 0.009147 |
| PDGFD     | -1.3964292 | 0.009158 |
| METAP2    | -1.7673315 | 0.009166 |
| DYRK2     | -1.3676561 | 0.009193 |
| HLA-DMA   | -1.4497242 | 0.009194 |
| PPP1CB    | -1.6433985 | 0.009194 |
| ZNF652    | -1.7883649 | 0.009196 |
| DPYSL2    | -1.0950791 | 0.009208 |
| HS2ST1    | -1.5734189 | 0.009366 |
| NCK1      | -1.0932147 | 0.009366 |
| PIP4K2A   | -1.1962369 | 0.009366 |
| ACTR3     | -1.625042  | 0.009425 |
| PTPN12    | -1.4521996 | 0.009425 |
| IFI44L    | -1.1342471 | 0.009491 |
| AMMECR1   | -1.1377163 | 0.009519 |
| HLA-E     | -1.3344757 | 0.009535 |
| NUDT3     | -1.4737661 | 0.009561 |
| ZC3H7A    | -1.1398443 | 0.009576 |
| WDR37     | -1.49926   | 0.00965  |
| DYRK2     | -1.0424138 | 0.00967  |
| CPA3      | -2.3640261 | 0.009689 |
| ELAVL1    | -1.1892203 | 0.009689 |
| SCAF8     | -1.1898143 | 0.009689 |

|          |            |          |
|----------|------------|----------|
| PDIA4    | -1.130373  | 0.009837 |
| AXL      | -1.8258582 | 0.00985  |
| ZNF280D  | -1.3732279 | 0.009894 |
| RBM8A    | -1.0597157 | 0.009895 |
| SERPING1 | -1.2335196 | 0.009895 |
| BMPR1A   | -1.2801153 | 0.009968 |
| ENO1     | -1.3221945 | 0.009968 |
| PAPPA2   | -1.4477594 | 0.009968 |
| TRAM2    | -1.2335811 | 0.009968 |
| TXNDC5   | -1.433697  | 0.009968 |
| UBE3C    | -1.0090135 | 0.009968 |
| ATG2B    | -1.2014006 | 0.009977 |
| TSPAN3   | -1.3513101 | 0.009981 |
| ANXA3    | -2.2592022 | 0.009991 |
| PLCB4    | -1.3651433 | 0.009991 |
| TNPO1    | -1.2152183 | 0.009991 |
| PAK2     | -1.7488093 | 0.009995 |
| DUSP9    | 1.1743244  | 0.010049 |
| MRC1     | -1.8306772 | 0.010049 |
| ADGRG6   | -1.4481563 | 0.01006  |
| EIF4B    | -1.1792609 | 0.010094 |
| SAMD4A   | -1.3385078 | 0.010094 |
| CLTB     | 1.1844783  | 0.010106 |
| HSP90B1  | -1.4908019 | 0.010117 |
| CTSS     | -1.4709702 | 0.010149 |
| CKLF     | -1.3900906 | 0.010173 |
| MET      | -1.2337263 | 0.010173 |
| WIPI1    | -1.3012856 | 0.010173 |
| BCLAF1   | -1.4185675 | 0.01018  |
| CAST     | -1.2961681 | 0.010217 |
| BAG2     | -1.2296281 | 0.010276 |
| KANSL1L  | -1.3747153 | 0.010336 |
| HSPA4    | -1.3171408 | 0.010367 |
| RECQL    | -1.4902336 | 0.010367 |
| TFPI2    | -1.8466307 | 0.010367 |
| ANKRD10  | -1.4332148 | 0.010399 |
| IPO7     | -1.4681436 | 0.010399 |
| HLA-DRA  | -1.9831544 | 0.010409 |
| RAB14    | -1.6069813 | 0.010452 |
| CD163    | -1.8868488 | 0.010513 |
| DACT1    | -1.4251777 | 0.010598 |
| MALT1    | -1.308204  | 0.010601 |
| ATM      | -1.2692953 | 0.010679 |
| TLR7     | -1.4800982 | 0.010679 |
| TMEM2    | -1.1773992 | 0.010801 |
| LY75     | -1.5639991 | 0.010834 |
| WDR61    | -1.5196677 | 0.010849 |
| KPNA1    | -1.0301231 | 0.010852 |
| NAP1L1   | -1.4452385 | 0.010852 |
| ASNS     | -1.4642266 | 0.011094 |
| GMDS     | -1.768904  | 0.011122 |
| AP3B1    | -1.12478   | 0.011142 |
| FCGR3B   | -1.4128889 | 0.011142 |
| GUCY1B3  | -1.6894919 | 0.011249 |
| RBPJ     | -1.3970304 | 0.011249 |
| PLS1     | -1.6176952 | 0.011275 |
| MAGED4B  | -1.0640528 | 0.011316 |
| HSPA5    | -1.4850448 | 0.011322 |
| ATXN10   | -1.1248583 | 0.011503 |
| COPB1    | -1.2267252 | 0.011503 |
| AIDA     | -1.5684871 | 0.011513 |
| MEF2C    | -1.4304602 | 0.011634 |
| SH2B3    | -1.1015199 | 0.011634 |
| NNMT     | -2.7286045 | 0.011701 |
| PPP1R2   | -1.1990127 | 0.011701 |
| ZNF148   | -1.2814957 | 0.011721 |
| RCN1     | -1.3184957 | 0.011749 |
| CDC7     | -1.1861212 | 0.011756 |
| ANXA2P2  | -1.0351751 | 0.011762 |
| HLA-B    | -1.2006468 | 0.011762 |
| COIL     | -1.1496005 | 0.011793 |
| NR2F2    | -1.4830441 | 0.011793 |
| SLC35E2B | -1.2441461 | 0.011793 |
| TANK     | -1.3699046 | 0.011793 |
| CEL      | 1.2978241  | 0.011797 |
| TMEM30A  | -1.902575  | 0.011804 |
| ELF1     | -1.1561098 | 0.01181  |
| ARAP2    | -1.2055863 | 0.011824 |
| DNAJB14  | -1.2287642 | 0.011824 |
| LCP2     | -1.5861545 | 0.011828 |
| VCL      | -1.2472207 | 0.011833 |
| IFI16    | -1.4837901 | 0.011842 |
| TRBC1    | -1.4321606 | 0.011851 |
| UBE3A    | -1.0654956 | 0.011854 |



|           |            |          |
|-----------|------------|----------|
| CRKL      | -1.1590201 | 0.011882 |
| CUL2      | -1.0731993 | 0.011882 |
| APPL1     | -1.3020259 | 0.01191  |
| HLA-DPB1  | -1.3825005 | 0.01191  |
| IRF1      | -1.0533716 | 0.01191  |
| LYN       | -1.0542306 | 0.01191  |
| NENF      | 1.1185024  | 0.01191  |
| GRAMD3    | -1.0033251 | 0.011933 |
| ZKSCAN1   | -1.3057539 | 0.011943 |
| REV3L     | -1.2012479 | 0.012003 |
| API5      | -1.0758263 | 0.012009 |
| SLC35F2   | -1.0877372 | 0.012009 |
| SLC39A6   | -1.4020928 | 0.012053 |
| HRH1      | -1.4220091 | 0.01207  |
| LPAR6     | -1.0769149 | 0.012087 |
| NMT2      | -1.1721392 | 0.012087 |
| RHOA      | -1.5086329 | 0.012098 |
| BCLAF1    | -1.2280625 | 0.012125 |
| PSIP1     | -1.1647622 | 0.012125 |
| FAM208B   | -1.3028049 | 0.012129 |
| PON2      | -1.0233507 | 0.012129 |
| VPS13C    | -1.5070712 | 0.012129 |
| APPBP2    | -1.0029708 | 0.012233 |
| SPAST     | -1.0620244 | 0.012269 |
| ITGB2     | -1.513376  | 0.012328 |
| LY75      | -1.3919731 | 0.012328 |
| MAPRE1    | -1.0959023 | 0.012328 |
| RCBTB1    | -1.8654861 | 0.012328 |
| LHPP      | 1.0520079  | 0.012331 |
| SPRED2    | -1.2905253 | 0.012363 |
| DPH5      | -1.0685781 | 0.012389 |
| ZNF444    | 1.1806742  | 0.012402 |
| HLA-B     | -1.6168184 | 0.012505 |
| KDM5B     | -1.3481087 | 0.012506 |
| SKIV2L2   | -1.2465713 | 0.012506 |
| MYH8      | 1.8264495  | 0.012524 |
| TCEB2     | 1.2217914  | 0.012536 |
| MARCKS    | -2.2610749 | 0.012537 |
| ELL2      | 1.1195419  | 0.012561 |
| MPZL2     | -1.2593363 | 0.012581 |
| CAPRIN1   | -1.4347173 | 0.012607 |
| CYP4F12   | 1.0463972  | 0.012607 |
| FLRT3     | -1.3818912 | 0.012613 |
| LRRFIP1   | -1.7391382 | 0.012613 |
| XRCC5     | -1.2796136 | 0.012613 |
| MAFB      | -1.2815466 | 0.012641 |
| ADIRF     | 1.7786299  | 0.012657 |
| TMEM243   | -1.2305812 | 0.012657 |
| VLDLR     | -1.7799962 | 0.012775 |
| STAT1     | -1.0585354 | 0.012804 |
| CLEC4A    | -2.1004318 | 0.012821 |
| FEM1C     | -1.1697327 | 0.012821 |
| FMOS      | 1.4626963  | 0.012841 |
| RAD21     | -1.2336694 | 0.012873 |
| PAICS     | -1.2080571 | 0.012939 |
| GNAI3     | -1.1082425 | 0.013006 |
| LAPTM4B   | -1.3986527 | 0.013006 |
| PROC      | 1.8300574  | 0.013006 |
| SPARC     | -1.4193127 | 0.013006 |
| GLRX3     | -1.2333055 | 0.013081 |
| DPYD      | -1.1150148 | 0.013086 |
| CELF2     | -1.4452272 | 0.013136 |
| CCT6A     | -1.3892172 | 0.013141 |
| COL6A3    | -2.3186457 | 0.013212 |
| IL1R1     | -1.2971967 | 0.013212 |
| KIAA0226L | -1.256735  | 0.013212 |
| TOMM20    | -1.3813071 | 0.013212 |
| ERAP1     | -1.212105  | 0.013222 |
| SPG21     | -1.0235369 | 0.013258 |
| ATR       | -1.1688768 | 0.013333 |
| RAI2      | -1.0243262 | 0.013405 |
| CASP4     | -1.2143109 | 0.013447 |
| KCTD3     | -1.6924312 | 0.013447 |
| EIF3B     | -1.1211574 | 0.01346  |
| PPM1D     | -1.2487511 | 0.013501 |
| GCOM1     | -1.1052336 | 0.013504 |
| IGK       | -2.2441656 | 0.013507 |
| NR1D2     | -1.3826963 | 0.013507 |
| FBXO5     | -1.00598   | 0.013511 |
| GBP1      | -1.3442202 | 0.013511 |
| SS18      | -1.1378641 | 0.013511 |
| FAM129A   | -1.260539  | 0.013543 |
| PCM1      | -1.4135261 | 0.013543 |
| YWHAZ     | -1.7237101 | 0.013543 |

|          |            |          |
|----------|------------|----------|
| TGM2     | -1.5523005 | 0.013588 |
| BLNK     | -1.401462  | 0.013605 |
| FBLN5    | -1.0519364 | 0.013605 |
| SLC2A4RG | 1.2048806  | 0.013605 |
| CANX     | -1.4086147 | 0.013652 |
| NCOA2    | -1.4213912 | 0.013652 |
| BPI      | 1.1231828  | 0.013654 |
| IFNGR1   | -1.3508314 | 0.013654 |
| NEU1     | -1.2026096 | 0.013654 |
| VDAC1    | -1.8979567 | 0.013654 |
| PTPN11   | -1.0975805 | 0.013699 |
| YES1     | -1.9556914 | 0.013701 |
| ENPP4    | -1.3039869 | 0.013711 |
| RNASE6   | -1.5137118 | 0.013754 |
| PCGF3    | -1.0204121 | 0.013758 |
| DCAF6    | -1.0392536 | 0.013761 |
| RND3     | -1.5988267 | 0.013761 |
| GCA      | -1.219766  | 0.013768 |
| PRKX     | -1.4399915 | 0.013789 |
| HLA-DQA2 | -2.4750702 | 0.013795 |
| MNS1     | -1.2922326 | 0.013795 |
| FAM3C    | -1.3848742 | 0.013844 |
| NENF     | 1.0197927  | 0.013906 |
| APOBEC3G | -1.6735169 | 0.013915 |
| PRRC2C   | -1.0791674 | 0.013915 |
| WDR44    | -1.1005855 | 0.013915 |
| TNFAIP6  | -1.4082441 | 0.013925 |
| APLP2    | -1.777377  | 0.013958 |
| LAPTM4A  | -1.0088943 | 0.014025 |
| EFNB2    | -1.2814487 | 0.014026 |
| UBE3A    | -1.0912742 | 0.014058 |
| ACTR3    | -1.5684845 | 0.014082 |
| NUP160   | -1.3410551 | 0.014082 |
| SYK      | -1.0213418 | 0.014082 |
| WASF3    | -1.0298574 | 0.01414  |
| TGFB2    | -1.1789731 | 0.014331 |
| NAP1L1   | -1.278441  | 0.01439  |
| NENF     | 1.1076222  | 0.01439  |
| TRIM37   | -1.0625655 | 0.014403 |
| OPCML    | 1.007744   | 0.014412 |
| LEPROT   | -1.4237481 | 0.01442  |
| CEP170P1 | -1.2073691 | 0.014459 |
| KRIT1    | -1.3839647 | 0.01447  |
| B4GALT4  | -1.2737114 | 0.014519 |
| CLDND1   | -1.0212318 | 0.014537 |
| CMPK1    | -1.2761732 | 0.014545 |
| TTC3P1   | -1.6548389 | 0.014545 |
| BPTF     | -1.0117256 | 0.014557 |
| FHL1     | -1.7006331 | 0.014557 |
| MICAL2   | -1.3575402 | 0.014557 |
| NEDD4    | -1.2682347 | 0.014557 |
| HLA-F    | -1.0108605 | 0.01458  |
| MARCKS   | -1.3717806 | 0.01458  |
| CNN3     | -1.5591255 | 0.014583 |
| EOGT     | -1.1572365 | 0.014583 |
| NT5E     | -1.066132  | 0.014583 |
| FAS      | -1.1724973 | 0.014624 |
| MLEC     | -1.1166168 | 0.014627 |
| RP2      | -1.0024322 | 0.014632 |
| NRBF2    | -1.2425022 | 0.01466  |
| B4GALT5  | -1.1486392 | 0.014675 |
| SYNJ2    | -1.0158587 | 0.014675 |
| ARID4B   | -1.114845  | 0.014683 |
| ITSN1    | -1.1597878 | 0.014734 |
| CHL1     | -1.570679  | 0.014768 |
| DCP2     | -1.4851446 | 0.014768 |
| APAF1    | -1.0785823 | 0.01482  |
| APOBEC3B | -1.0800499 | 0.01482  |
| HCLS1    | -1.5872291 | 0.014836 |
| OXR1     | -1.5388261 | 0.014862 |
| HLA-E    | -1.2469553 | 0.014876 |
| MALT1    | -1.1486007 | 0.014881 |
| CHST15   | -1.529867  | 0.014884 |
| ARID1A   | -1.0995124 | 0.014885 |
| LARP4B   | -1.0248636 | 0.01494  |
| SNX2     | -1.7685459 | 0.01494  |
| FOXN3    | -1.1445774 | 0.015041 |
| TMEM45A  | -1.3882559 | 0.015041 |
| DPM3     | 1.2727982  | 0.015103 |
| FNBP1    | -1.1524199 | 0.015108 |
| MYO1D    | -1.2318228 | 0.015151 |
| CREBZF   | -1.2337295 | 0.015162 |
| TSPAN13  | -1.4880448 | 0.015217 |
| HLA-DPA1 | -1.6691103 | 0.015218 |

|            |            |          |
|------------|------------|----------|
| MBD4       | -1.5534631 | 0.015257 |
| CCNT2      | -1.0472708 | 0.015278 |
| NENF       | 1.0163759  | 0.015279 |
| ICAM1      | -1.1775243 | 0.015319 |
| F2RL1      | -1.5490783 | 0.015359 |
| PRELID3B   | -1.6801203 | 0.015359 |
| MAPKAPK5   | -1.0785814 | 0.015433 |
| ST13       | -1.0664843 | 0.015466 |
| ZC3H13     | -1.2646343 | 0.015531 |
| SETSIP     | -1.1624856 | 0.015627 |
| SOCS5      | -1.1098805 | 0.015627 |
| SDCBP      | -1.4415237 | 0.015658 |
| CASP6      | -1.0207963 | 0.015666 |
| IGK        | -2.2463816 | 0.015675 |
| PON3       | 1.0039318  | 0.015707 |
| THY1       | 1.4578197  | 0.015707 |
| SERPINA3   | -2.2755242 | 0.015708 |
| ACTB       | -1.1662038 | 0.015718 |
| MS4A6A     | -1.5679775 | 0.015726 |
| CANX       | -1.0397395 | 0.015803 |
| HBS1L      | -1.0415989 | 0.015834 |
| PDS5A      | -1.0367683 | 0.015892 |
| NFATC3     | -1.0959641 | 0.015919 |
| ITGA6      | -1.0094986 | 0.015921 |
| IL6ST      | -1.3546761 | 0.015929 |
| ACTG1      | -1.2759934 | 0.015944 |
| USO1       | -1.7190103 | 0.015951 |
| VTCN1      | -1.6973651 | 0.015951 |
| THBS2      | -2.1162424 | 0.015991 |
| SLC38A2    | -1.5971591 | 0.016009 |
| TNFRSF11B  | -1.4031177 | 0.016022 |
| TXN2       | 1.0147851  | 0.016022 |
| COG5       | -1.0158353 | 0.016035 |
| ILF2       | -1.6830756 | 0.016035 |
| CSGALNACT2 | -1.0102022 | 0.016132 |
| ARHGAP29   | -1.63603   | 0.016247 |
| ROGDI      | 1.0712786  | 0.016247 |
| KPNA2      | -1.4125396 | 0.016253 |
| NAP1L1     | -1.2027347 | 0.016314 |
| MED14      | -1.4251689 | 0.016539 |
| SNHG4      | -1.2505139 | 0.016539 |
| PCMTD2     | -1.2673434 | 0.016546 |
| BNIP3L     | -1.3477806 | 0.016565 |
| PSAP       | -1.6577879 | 0.016623 |
| WFDC2      | -1.3390266 | 0.016646 |
| ACSL3      | -1.1449984 | 0.016762 |
| HTATIP2    | -1.0256962 | 0.016787 |
| STK38L     | -1.0151748 | 0.016787 |
| LUM        | -2.2475242 | 0.016805 |
| KCTD12     | -1.9427004 | 0.016828 |
| KPNA3      | -1.4020897 | 0.016899 |
| GADD45G    | 1.7687824  | 0.016906 |
| CARMIL1    | -1.3755877 | 0.016923 |
| AGA        | -1.1126099 | 0.01707  |
| ATG12      | -1.6098753 | 0.01707  |
| AHR        | -1.0698318 | 0.017087 |
| BTN3A2     | -1.1083453 | 0.017118 |
| MORF4L1    | -1.1934233 | 0.017118 |
| CDK10      | 1.0180877  | 0.017121 |
| SPON2      | -1.403733  | 0.017221 |
| CPNE3      | -1.7264575 | 0.017258 |
| SLC4A1     | 1.2419729  | 0.017309 |
| NAMPT      | -1.455265  | 0.017322 |
| TMEM123    | -1.4525429 | 0.017351 |
| TNPO1      | -1.2229843 | 0.017392 |
| UBD        | -1.2021553 | 0.017395 |
| ITFG1      | -1.4234232 | 0.017399 |
| HNRNPK     | -1.1257145 | 0.017416 |
| XPNPEP1    | -1.3300162 | 0.017432 |
| ANXA4      | -1.3582682 | 0.017499 |
| CRNL1      | -1.1139797 | 0.017499 |
| MBNL1      | -1.0182214 | 0.017499 |
| SELL       | -1.5769535 | 0.017514 |
| PDGFRA     | -1.7994814 | 0.017517 |
| HMGN4      | -1.751552  | 0.017521 |
| VCAN       | -1.5454001 | 0.017544 |
| CDKN1B     | -1.3324772 | 0.017602 |
| PSMC2      | -1.111342  | 0.017602 |
| SGPL1      | -1.0264442 | 0.017602 |
| TGIF1      | -1.1685633 | 0.017602 |
| ZFAND1     | -1.1111882 | 0.017602 |
| ACTG1      | -1.4019995 | 0.017675 |
| HEG1       | -1.4445596 | 0.017685 |
| HADHA      | -1.4209703 | 0.017704 |

|              |            |          |
|--------------|------------|----------|
| LPL          | 1.576311   | 0.017745 |
| RARRES1      | -1.0070361 | 0.017845 |
| TTC28        | -1.2122021 | 0.017889 |
| THY1         | 1.4397553  | 0.01789  |
| SLC30A5      | -1.212767  | 0.017957 |
| ALDH1A3      | -1.143107  | 0.018023 |
| KIAA0430     | -1.3520697 | 0.018037 |
| ABHD14A      | 1.3508723  | 0.018074 |
| HLA-E        | -1.0162018 | 0.018074 |
| LOC100129503 | 1.1073887  | 0.018074 |
| HSP90AB1     | -1.3279104 | 0.018096 |
| MCFD2        | -1.232008  | 0.018167 |
| GPC4         | -1.0514252 | 0.01826  |
| GCNT3        | -1.0161525 | 0.018295 |
| TUBA1B       | -1.314398  | 0.018295 |
| KLRB1        | -1.2453041 | 0.018339 |
| MAPK1        | -1.1214834 | 0.018339 |
| EPB41L2      | -1.103796  | 0.018373 |
| PGK1         | -2.2357099 | 0.018436 |
| SRSF10       | -1.1764872 | 0.018436 |
| PNMA2        | -1.4358424 | 0.018443 |
| PNN          | -1.0922571 | 0.018457 |
| TCAF1        | -1.2522237 | 0.018459 |
| PPP1R1A      | 1.2638916  | 0.018516 |
| MAN2A1       | -1.258665  | 0.01857  |
| SETSIP       | -1.2219217 | 0.01857  |
| TMED10       | -1.2564501 | 0.01857  |
| ASUN         | -1.2086058 | 0.018573 |
| FLI1         | -1.7519569 | 0.018573 |
| IBTK         | -1.1369353 | 0.018573 |
| MDM1         | -1.2008894 | 0.018573 |
| PGD          | -1.0038538 | 0.018573 |
| RPF1         | -1.1814613 | 0.018595 |
| CD93         | -1.7965565 | 0.018637 |
| CLCN3        | -1.0445674 | 0.018709 |
| CCZ1B        | -1.230041  | 0.018733 |
| ACOT11       | 1.2120855  | 0.018915 |
| NDUFB7       | 1.4958653  | 0.018924 |
| RNASE4       | -1.4132712 | 0.018981 |
| CD69         | -1.9032285 | 0.019001 |
| FASTKD2      | -1.1012111 | 0.019001 |
| RAB31        | -1.1585618 | 0.019066 |
| LBH          | -1.101741  | 0.019111 |
| SLC16A7      | 1.2657549  | 0.019116 |
| DIEXF        | -1.0654718 | 0.019118 |
| SEC11A       | -1.009322  | 0.019193 |
| TSN          | -1.0688143 | 0.019317 |
| PLA2G4A      | -1.2205065 | 0.019403 |
| RAN          | -1.6154017 | 0.019566 |
| CLPX         | -1.1120111 | 0.019607 |
| FHL2         | -1.4685576 | 0.01964  |
| PFKP         | -1.0495373 | 0.019862 |
| DNMT3L       | 1.3439342  | 0.019926 |
| KRT19        | -1.6611381 | 0.020133 |
| ARMCX3       | -1.0643115 | 0.020144 |
| ANKHD1       | -1.2087243 | 0.020195 |
| HLA-DPA1     | -1.2352714 | 0.02026  |
| PTPMT1       | -1.0871868 | 0.02026  |
| TMX4         | -1.047184  | 0.02026  |
| DHX29        | -1.280263  | 0.020286 |
| CCSER2       | -1.1260928 | 0.020287 |
| PKP1         | 1.0068567  | 0.020312 |
| XBP1         | -1.4951657 | 0.020336 |
| STRN3        | -1.2929197 | 0.020376 |
| LRPPRC       | -1.1500243 | 0.02038  |
| DARS         | -1.1805732 | 0.020458 |
| REST         | -1.1252477 | 0.020552 |
| SYNE2        | -1.1737377 | 0.020552 |
| TUBA1A       | -1.1712036 | 0.020552 |
| SMARCA2      | -1.3310315 | 0.020694 |
| RAB31        | -1.2482047 | 0.020773 |
| ENDOD1       | -1.3273476 | 0.020796 |
| NAMPT        | -1.5352448 | 0.02082  |
| U2SURP       | -1.1798321 | 0.020866 |
| FLII         | -1.1745736 | 0.02087  |
| ZNF267       | -1.0258578 | 0.020921 |
| UFL1         | -1.3659675 | 0.020938 |
| PTBP2        | -1.4723819 | 0.021049 |
| WWP1         | -1.0156347 | 0.021049 |
| PFN1         | -1.2338198 | 0.021054 |
| THAP1        | -1.0736024 | 0.021063 |
| ARHGEF12     | -1.0321348 | 0.021066 |
| CASD1        | -1.4825514 | 0.021177 |
| MTUS1        | -1.2633408 | 0.021184 |

|           |            |          |
|-----------|------------|----------|
| GPNUMB    | -1.6194187 | 0.021299 |
| SEL1L3    | -1.4705114 | 0.021322 |
| SEC23B    | -1.6407146 | 0.021339 |
| TXNIP     | -1.6081168 | 0.021347 |
| TUG1      | -1.1088831 | 0.021549 |
| RCHY1     | -1.9213412 | 0.021562 |
| APC       | -1.3599275 | 0.021728 |
| FAM60A    | -1.1769482 | 0.021732 |
| LIPA      | -1.2770844 | 0.021755 |
| POSTN     | -2.2348855 | 0.021791 |
| NDUFS8    | 1.0991152  | 0.021802 |
| ANKRA2    | -1.0372833 | 0.021812 |
| SEC63     | -1.0678622 | 0.021818 |
| MAP4K3    | -1.6691871 | 0.021966 |
| EED       | -1.0658933 | 0.022075 |
| CAPN7     | -1.1493601 | 0.022151 |
| NAP1L1    | -1.0987592 | 0.022247 |
| BUB3      | -1.1312181 | 0.022265 |
| CYB5B     | -1.1562461 | 0.022323 |
| ABCB1     | -1.5510294 | 0.022384 |
| GADD45B   | 1.1410851  | 0.022405 |
| SERPINB9  | -1.4007948 | 0.022405 |
| MYO1B     | -1.1586415 | 0.022455 |
| PP1P5K2   | -1.3358702 | 0.022476 |
| GP1R1     | 1.0107339  | 0.022723 |
| TNFRSF11B | -1.4049785 | 0.022723 |
| ZNF292    | -1.0533716 | 0.022723 |
| PPP3CA    | -1.1660715 | 0.022735 |
| EGF       | 1.8194354  | 0.022764 |
| EFEMP1    | -1.1740615 | 0.022766 |
| TIMP1     | -1.7375773 | 0.022766 |
| LRMP      | -1.2338578 | 0.022773 |
| TTC19     | -1.1689772 | 0.02279  |
| SNX10     | -1.2462116 | 0.022796 |
| BHLHE41   | -1.3056015 | 0.022854 |
| STK39     | -1.0139211 | 0.022854 |
| UBE2G1    | -1.4931507 | 0.022957 |
| FYN       | -1.2872038 | 0.022978 |
| PDLIM5    | -1.086106  | 0.022978 |
| ADGRL2    | -1.2172719 | 0.023214 |
| SPP1      | -1.396654  | 0.023228 |
| SRGN      | -1.5522661 | 0.023237 |
| HOPX      | -2.4730656 | 0.023254 |
| ISOC2     | 1.0106991  | 0.023304 |
| TRIL      | -1.0012574 | 0.023304 |
| HTR2B     | -1.9128795 | 0.023367 |
| AURKAIP1  | 1.0096238  | 0.023419 |
| UBE2D3    | -1.0765758 | 0.023493 |
| SH3GLB1   | -1.254717  | 0.023498 |
| DECR2     | 1.0312126  | 0.02356  |
| TRPC1     | -1.0783637 | 0.023615 |
| GSPT2     | -1.1004046 | 0.023621 |
| TPD52     | -1.5292106 | 0.023637 |
| DCLK1     | -1.1458659 | 0.023652 |
| TPM1      | -1.1374336 | 0.023652 |
| IGLL3P    | -1.6693995 | 0.023721 |
| CXCL8     | -2.4474179 | 0.023836 |
| SLC38A2   | -1.7238888 | 0.023836 |
| CD2       | -1.2740109 | 0.023846 |
| PLS3      | -1.0390886 | 0.023885 |
| DES12     | -1.1243179 | 0.02392  |
| NUP153    | -1.2076304 | 0.023995 |
| METTL1    | 1.1366681  | 0.024026 |
| RBBP4     | -1.4574339 | 0.024026 |
| ARPC3     | -1.2337617 | 0.024183 |
| IARS2     | -1.1228489 | 0.02426  |
| ARPC1A    | -1.3572473 | 0.024264 |
| PGK1      | -1.5543466 | 0.024276 |
| BAIAP2    | 1.1859076  | 0.024311 |
| TMED7     | -1.3963464 | 0.024463 |
| AMACR     | -1.7227912 | 0.024466 |
| RAB11FIP3 | 1.7574245  | 0.024502 |
| SEC63     | -1.2626711 | 0.024519 |
| SCAMP1    | -1.1478714 | 0.024584 |
| SNX1      | -1.1823019 | 0.02469  |
| SPG7      | -1.1975621 | 0.024742 |
| TTC3P1    | -1.0314448 | 0.02478  |
| GSPT1     | -1.0161786 | 0.024816 |
| SNX3      | -1.1465456 | 0.024834 |
| KIAA1033  | -1.135832  | 0.024843 |
| STAG2     | -1.1037355 | 0.024843 |
| RNF138    | -1.4451488 | 0.02485  |
| TNFSF10   | -1.2647789 | 0.024896 |
| FBN1      | -1.4181819 | 0.025044 |

|          |            |          |
|----------|------------|----------|
| HLA-DRB4 | -1.3414343 | 0.025044 |
| KCTD12   | -1.0841314 | 0.025197 |
| ATXN7    | -1.1558586 | 0.025251 |
| CCPG1    | -1.2055095 | 0.02526  |
| XPOT     | -1.0634538 | 0.02546  |
| IL15     | -1.1238207 | 0.025513 |
| TGFBI    | -1.6925693 | 0.025513 |
| LOXL1    | -1.0143664 | 0.025598 |
| TRBC1    | -1.1444168 | 0.025598 |
| EIF2S1   | -1.1292366 | 0.025703 |
| MOB1A    | -1.0002577 | 0.025703 |
| SGK3     | -1.306838  | 0.025703 |
| CFI      | -1.7746094 | 0.025715 |
| MCUB     | -1.3743578 | 0.025717 |
| PHACTR4  | -1.02772   | 0.025726 |
| TES      | -1.2309483 | 0.025726 |
| MSR1     | -1.1568393 | 0.025735 |
| GBP2     | -1.0907784 | 0.025757 |
| GUSBP11  | -1.6180441 | 0.025757 |
| MCM9     | -1.2867495 | 0.025879 |
| SEC24D   | -1.0754271 | 0.025879 |
| CAND1    | -1.2202488 | 0.025927 |
| LYST     | -1.1224708 | 0.025959 |
| FCGR2A   | -1.3662073 | 0.026105 |
| BTD      | 1.1083766  | 0.026167 |
| CXCR4    | -2.3319888 | 0.026172 |
| INSIG2   | -1.5671341 | 0.026218 |
| SLK      | -1.346032  | 0.026337 |
| IL33     | -1.1429445 | 0.026357 |
| LMBRD1   | -1.4452499 | 0.026379 |
| TMEM135  | -1.2336027 | 0.026405 |
| CYP3A7   | 1.0848077  | 0.026437 |
| GEM      | -1.260487  | 0.026508 |
| BZW1     | -1.2118338 | 0.026515 |
| IGF2R    | -1.313115  | 0.026578 |
| CAMSAP2  | -1.1208482 | 0.026665 |
| SERPINE2 | -1.1201487 | 0.026745 |
| TTF2     | -1.133667  | 0.027054 |
| DDX18    | -1.2384259 | 0.027202 |
| ADCY7    | -1.0523583 | 0.02733  |
| CXCL12   | -1.454984  | 0.027365 |
| UBR5     | -1.0341202 | 0.027407 |
| GALNT12  | -1.2754532 | 0.027449 |
| GEMIN2   | -1.0475218 | 0.027449 |
| FAM129A  | -1.359732  | 0.027466 |
| PLBD1    | -1.0849059 | 0.027472 |
| CDH1     | -1.2725738 | 0.027597 |
| AKAP12   | -1.2240728 | 0.027647 |
| ATP2A2   | -1.0083247 | 0.027736 |
| CAPN6    | -1.8543132 | 0.027842 |
| LEPROT   | -1.1111155 | 0.027866 |
| DCK      | -1.3216644 | 0.027875 |
| BAG5     | -1.4635846 | 0.027963 |
| ARPC5    | -1.3359086 | 0.027964 |
| PROS1    | -1.2636964 | 0.028    |
| SPCS3    | -1.060359  | 0.028    |
| HACD2    | -1.0633822 | 0.028043 |
| STK26    | -1.2781546 | 0.028043 |
| ATP2C1   | -1.0870571 | 0.028065 |
| DDOST    | -1.2480031 | 0.028134 |
| C1QB     | -1.4569126 | 0.028144 |
| HLA-C    | -1.011463  | 0.028269 |
| DEK      | -1.253777  | 0.02836  |
| COL1A2   | -1.4376225 | 0.028374 |
| TOR1AIP1 | -1.1039226 | 0.028382 |
| MTM1     | -1.214038  | 0.028547 |
| KDM3A    | -1.2491903 | 0.028593 |
| MYO6     | -1.0819691 | 0.028593 |
| PTGS1    | -1.0373839 | 0.028644 |
| RG54     | -1.2058662 | 0.0287   |
| IGSF6    | -1.2526578 | 0.028947 |
| AMIGO2   | -1.1280799 | 0.029114 |
| CLEC7A   | -1.5515388 | 0.029288 |
| TRIM33   | -1.1035657 | 0.029373 |
| CD9      | -1.5922854 | 0.029446 |
| ADAMTS1  | -1.7702533 | 0.029459 |
| PSMC6    | -1.0803942 | 0.02948  |
| SEMA5A   | -1.373539  | 0.02962  |
| UFL1     | -1.3325217 | 0.029711 |
| RAP2C    | -1.2023305 | 0.029735 |
| BACH1    | -1.15041   | 0.02987  |
| ABCB4    | -1.6463855 | 0.030117 |
| SETSIIP  | -1.670498  | 0.030117 |
| CDC123   | -1.0683278 | 0.030145 |

|          |            |          |
|----------|------------|----------|
| SF3B1    | -1.1675441 | 0.030176 |
| MTCL1    | -1.0809013 | 0.030206 |
| CPD      | -1.0297734 | 0.030315 |
| NUP50    | -1.1874738 | 0.030316 |
| SART3    | -1.0452226 | 0.030426 |
| ZNF814   | -1.1857921 | 0.030426 |
| TRIB2    | -1.2516399 | 0.030478 |
| SPG20    | -1.0375997 | 0.030486 |
| CREB3L2  | -1.1010129 | 0.030504 |
| LPCAT1   | -1.0080476 | 0.03053  |
| ROCK2    | -1.4564504 | 0.030532 |
| INTS8    | -1.1906703 | 0.030581 |
| PALLD    | -1.0209595 | 0.030619 |
| WWP1     | -1.1538065 | 0.030795 |
| PPP1CB   | -1.1168039 | 0.030886 |
| PRPF18   | -1.151692  | 0.031213 |
| AGFG1    | -1.0395588 | 0.031224 |
| SEL1L    | -1.2206359 | 0.031224 |
| WNT5A    | -1.4143053 | 0.031224 |
| GATC     | -1.0892047 | 0.031231 |
| BCL10    | -1.030786  | 0.031239 |
| TTC37    | -1.0575658 | 0.031281 |
| GPR18    | -1.0155753 | 0.03146  |
| ARFGF2   | -1.1363992 | 0.031484 |
| MUC1     | -1.0573897 | 0.031622 |
| XPO1     | -1.3913548 | 0.031625 |
| CELF2    | -1.2517258 | 0.031884 |
| DHRS7    | -1.0438258 | 0.031918 |
| FAM149A  | 1.176613   | 0.031918 |
| USP46    | -1.2388335 | 0.031918 |
| HMGN1    | -1.1005828 | 0.032188 |
| RG51     | -1.0505855 | 0.032188 |
| SEL1L2   | -1.0766727 | 0.032277 |
| MOXD1    | -2.0268703 | 0.03263  |
| HLA-DQB1 | -1.6152463 | 0.032647 |
| PRKAR1A  | -1.3250059 | 0.032647 |
| TCEAL2   | 1.1944204  | 0.032701 |
| ASNSD1   | -1.0500424 | 0.032802 |
| GYG1     | -1.1546623 | 0.032855 |
| PTP4A2   | -1.1383085 | 0.032855 |
| GNS      | -1.079634  | 0.032955 |
| LHFP     | -1.3242938 | 0.033012 |
| BCLAF1   | -1.4701683 | 0.033027 |
| VPS26A   | -1.1637339 | 0.033027 |
| ARF4     | -1.1165804 | 0.033044 |
| THBS1    | -2.0432036 | 0.033099 |
| LARP4    | -1.0250641 | 0.033292 |
| RNF38    | -1.2491737 | 0.033361 |
| EIF2AK2  | -1.2826145 | 0.033395 |
| NFIB     | -1.3810711 | 0.033524 |
| WNT5A    | -1.2697342 | 0.033617 |
| GLOD4    | -1.1677884 | 0.033674 |
| SGCE     | -1.6319682 | 0.033681 |
| CEP76    | -1.0451572 | 0.033723 |
| PPP2R5E  | -1.1703845 | 0.033876 |
| ERBIN    | -1.2707892 | 0.033886 |
| NFE2L2   | -1.2193668 | 0.03396  |
| LIN7C    | -1.0114153 | 0.034012 |
| CYP24A1  | -1.6895719 | 0.03402  |
| DDX5     | -1.422469  | 0.03402  |
| GDE1     | -1.1117338 | 0.034149 |
| ABCC4    | -1.5764146 | 0.034256 |
| CYP1B1   | -1.2860965 | 0.034335 |
| NPTN     | -1.1571062 | 0.034465 |
| IL10RA   | -1.4180004 | 0.034482 |
| RAB1A    | -1.79494   | 0.034575 |
| NDFIP1   | -1.0678107 | 0.034601 |
| ZKSCAN7  | -1.2480792 | 0.034773 |
| TCL6     | 1.1158829  | 0.034803 |
| ATP5D    | 1.1041065  | 0.034883 |
| LY96     | -1.9663037 | 0.034883 |
| CFH      | -1.1249898 | 0.035007 |
| ANXA4    | -1.1979337 | 0.035073 |
| RAC2     | -1.1499588 | 0.035198 |
| EIF5     | -1.2397628 | 0.035248 |
| PLEK     | -1.1644157 | 0.035384 |
| TTC37    | -1.0112839 | 0.035384 |
| EGLN3    | -1.0525047 | 0.035617 |
| HNRNPD   | -1.3021976 | 0.035749 |
| RNASET2  | -1.3829223 | 0.035819 |
| EIF3M    | -1.5747156 | 0.035829 |
| CCNT2    | -1.0935056 | 0.036011 |
| POU2AF1  | -2.5541059 | 0.036011 |
| CD58     | -1.0741696 | 0.036253 |

|          |            |          |
|----------|------------|----------|
| ALDH1A1  | -1.7073611 | 0.03627  |
| MINPP1   | -1.4292222 | 0.03627  |
| HLA-DRB3 | -1.4614498 | 0.036409 |
| CD24     | -1.4801093 | 0.036484 |
| FNBP4    | -1.1255106 | 0.036497 |
| CTNNB1   | -1.163467  | 0.036514 |
| CTBS     | -1.2450436 | 0.036714 |
| TMEM165  | -1.251942  | 0.036714 |
| ADAM9    | -1.0213052 | 0.036907 |
| ZNF277   | -1.2762469 | 0.03697  |
| PIGG     | -1.0160894 | 0.037299 |
| RASSF2   | -1.4185766 | 0.037364 |
| HLA-DRB1 | -1.1463506 | 0.037504 |
| PECAM1   | -1.21048   | 0.037555 |
| FNDC3B   | -1.1141072 | 0.037771 |
| UTP18    | -1.0363812 | 0.037853 |
| CORO1A   | -1.0190536 | 0.038053 |
| SCD      | -1.4263881 | 0.038053 |
| TCP1     | -1.2129605 | 0.038053 |
| C7       | -1.6349581 | 0.038131 |
| DOK5     | -1.0991906 | 0.038131 |
| SNRK     | -1.2163934 | 0.038265 |
| RNF114   | -1.101109  | 0.038296 |
| FAM179B  | -1.1995605 | 0.038473 |
| FABP5    | -1.1749566 | 0.038512 |
| PRKCB    | -1.0919048 | 0.038512 |
| FAIM     | -1.1009648 | 0.038712 |
| BPTF     | -1.0866963 | 0.038742 |
| TUBA1B   | -1.0019882 | 0.03876  |
| ZNF451   | -1.1908157 | 0.038769 |
| ADNP     | -1.1187416 | 0.038838 |
| AMZ2     | -1.467058  | 0.038838 |
| PPP2R3C  | -1.1345686 | 0.038978 |
| CXCL1    | -1.4037888 | 0.039146 |
| CD36     | -1.500012  | 0.039251 |
| PSMA1    | -1.0527507 | 0.039271 |
| KRAS     | -1.0758774 | 0.0394   |
| CAV2     | -1.0196705 | 0.039419 |
| IVNS1ABP | -1.2285671 | 0.039631 |
| ARSF     | 1.0233205  | 0.039794 |
| PTPN3    | -1.2377393 | 0.039859 |
| RPS21    | 1.0325567  | 0.039894 |
| RPL5     | -1.271804  | 0.040031 |
| TMSB4X   | -1.2761355 | 0.04009  |
| SERPINF2 | 1.0254766  | 0.040166 |
| PRMT3    | -1.0196182 | 0.040355 |
| HEY1     | 1.1067237  | 0.040459 |
| SPON1    | -1.2974938 | 0.040529 |
| BTBD3    | -1.2651669 | 0.040561 |
| RHEB     | -1.3654371 | 0.040561 |
| RSL24D1  | -1.1050244 | 0.040725 |
| NELFCD   | -1.0250976 | 0.041023 |
| NME7     | -1.2048432 | 0.041211 |
| GLIPR1   | -1.3947193 | 0.041215 |
| HABP2    | -1.2584955 | 0.041597 |
| PLAC8    | -1.3620119 | 0.041597 |
| IPO5     | -1.5303483 | 0.041723 |
| LAMP3    | -1.5374662 | 0.041962 |
| IQGAP1   | -1.2742667 | 0.042217 |
| SMARCA1  | -1.0517909 | 0.042225 |
| SLC39A4  | 1.2044627  | 0.04256  |
| ACTN1    | -1.4510876 | 0.042594 |
| STXBP3   | -1.1257262 | 0.042927 |
| SERINC1  | -1.4822336 | 0.042999 |
| EIF4E    | -1.0442978 | 0.043094 |
| TSPAN1   | -1.2088367 | 0.043148 |
| HSPA8    | -2.1763123 | 0.043213 |
| AZIN1    | -1.5529416 | 0.043286 |
| YWHAZ    | -1.7603447 | 0.043525 |
| PIIB     | -1.1863779 | 0.04353  |
| SULF1    | -1.1732917 | 0.043847 |
| NR2C1    | -1.0687849 | 0.043979 |
| TYRP1    | 1.5824723  | 0.044215 |
| RIOK3    | -1.5058941 | 0.044224 |
| HMGCR    | -1.1546411 | 0.044285 |
| SMC1A    | -1.0472556 | 0.044741 |
| PARP4    | -1.166916  | 0.04475  |
| HNRNPH2  | -1.3427187 | 0.044923 |
| MTHFD2   | -1.5685603 | 0.044923 |
| LYN      | -1.1942368 | 0.045142 |
| MYH8     | 1.3162062  | 0.045473 |
| STGGAL1  | -1.3561324 | 0.045586 |
| SLC38A1  | -1.3701328 | 0.045588 |
| NUP107   | -1.0210927 | 0.045602 |



|          |            |          |
|----------|------------|----------|
| SAMSN1   | -1.5818957 | 0.045639 |
| STAM     | -1.1793761 | 0.045662 |
| KDELR3   | -1.1077485 | 0.045762 |
| MATN2    | -1.1073873 | 0.045854 |
| CBR4     | -1.1326608 | 0.04606  |
| SRSF10   | -1.0451857 | 0.046162 |
| CTSO     | -1.1525204 | 0.046543 |
| APOC3    | 1.1827837  | 0.046577 |
| LAMC2    | -1.0344953 | 0.046634 |
| C4B      | -1.7372391 | 0.046754 |
| CTGF     | -1.3937251 | 0.046788 |
| MTDH     | -1.0085815 | 0.046789 |
| PTGER4   | -1.0829601 | 0.04682  |
| IGHM     | -1.9887768 | 0.046845 |
| HLA-DQB1 | -1.468529  | 0.046884 |
| CALML3   | 1.2080169  | 0.046995 |
| SRPX     | -1.024715  | 0.047256 |
| ARF3     | 1.0267495  | 0.047381 |
| ACVR1    | -1.1742954 | 0.047473 |
| ELF1     | -1.0782339 | 0.047738 |
| ZCCHC14  | -1.1105664 | 0.04801  |
| RAB31    | -1.01037   | 0.04812  |
| SGPP1    | -1.0493408 | 0.04827  |
| ZNF330   | -1.1367766 | 0.048583 |
| CD52     | -1.0729457 | 0.048768 |
| NNT      | -1.1476516 | 0.048888 |
| ZNF518A  | -1.1703744 | 0.048891 |
| PSMD1    | -1.0390196 | 0.048896 |
| GZMK     | -1.400597  | 0.049033 |
| TFPI     | -1.1362334 | 0.049175 |
| CAP2     | -1.0389993 | 0.049214 |
| MTMR4    | -1.0058666 | 0.049214 |
| MANSC1   | -1.0531082 | 0.04929  |
| TTC3P1   | -1.3856211 | 0.04995  |
| PSMD6    | -1.0469805 | 0.049973 |
