# Supplementary material for: A systematic integrative approach reveals novel microRNAs in diabetic nephropathy
Source: PubMed Central journal article supplement — J Res Med Sci. 2020 Jan 20;25:1. doi: 10.4103/jrms.JRMS_289_19 (PMC7003547; doi:10.4103/jrms.jrms_289_19), 2020-01-20
Supplement: JRMS-25-1_Suppl3.pdf [file JRMS-25-1_Suppl3.pdf]

**Supplementary Table 4:** Pathway enrichment analysis of the glomerule dataset. Signaling pathways related to the DE gene, TFs, and kinase of the glomerule network were detremined. Adj. P-value $\leq$ 0.05 was considered as statistical significance threshold.

| Pathway                                                                                                  | adj. p-value |
|----------------------------------------------------------------------------------------------------------|--------------|
| ABC-family proteins mediated transport                                                                   | 1.23069E-12  |
| Activated TLR4 signalling                                                                                | 9.69569E-05  |
| Activation of AKT2                                                                                       | 0.000523836  |
| Activation of APC/C and APC/C:Cdc20 mediated degradation of mitotic proteins                             | 1.23069E-12  |
| Activation of G protein gated Potassium channels                                                         | 0.015478822  |
| Activation of GABAB receptors                                                                            | 0.000143533  |
| Activation of IRF3/IRF7 mediated by TBK1/IKK epsilon                                                     | 9.69569E-05  |
| Activation of Kainate Receptors upon glutamate binding                                                   | 0.015478822  |
| Activation of NF-kappaB in B cells                                                                       | 1.23069E-12  |
| Activation of the AP-1 family of transcription factors                                                   | 0.001041885  |
| Adaptive Immune System                                                                                   | 8.86451E-06  |
| Adenylate cyclase inhibitory pathway                                                                     | 0.000143533  |
| Adherens junction                                                                                        | 4.11984E-12  |
| Adipocytokine signaling pathway                                                                          | 0.014248363  |
| ADP signalling through P2Y purinoceptor 1                                                                | 0.015478822  |
| ADP signalling through P2Y purinoceptor 12                                                               | 0.000143533  |
| Adrenaline,noradrenaline inhibits insulin secretion                                                      | 0.015478822  |
| Adrenergic signaling in cardiomyocytes                                                                   | 0.049384343  |
| AGE-RAGE signaling pathway in diabetic complications                                                     | 6.3338E-13   |
| AKT phosphorylates targets in the cytosol                                                                | 0.007462562  |
| Antigen processing: Ubiquitination & Proteasome degradation                                              | 8.86451E-06  |
| Antigen processing-Cross presentation                                                                    | 1.23069E-12  |
| APC/C:Cdc20 mediated degradation of mitotic proteins                                                     | 1.23069E-12  |
| APC/C:Cdc20 mediated degradation of Securin                                                              | 1.23069E-12  |
| APC/C:Cdh1 mediated degradation of Cdc20 and other APC/C:Cdh1 targeted proteins in late mitosis/early G1 | 1.23069E-12  |
| APC/C-mediated degradation of cell cycle proteins                                                        | 1.23069E-12  |
| APC:Cdc20 mediated degradation of cell cycle proteins prior to satisfaction of the cell cycle checkpoint | 1.23069E-12  |
| Apelin signaling pathway                                                                                 | 0.000265052  |
| Apoptosis                                                                                                | 0.003114477  |
| ARMS-mediated activation                                                                                 | 1.23069E-12  |
| Assembly of collagen fibrils and other multimeric structures                                             | 9.26518E-07  |
| Assembly of the pre-replicative complex                                                                  | 1.23069E-12  |
| Asymmetric localization of PCP proteins                                                                  | 1.23069E-12  |
| AUF1 (hnRNP D0) binds and destabilizes mRNA                                                              | 1.23069E-12  |
| Autodegradation of the E3 ubiquitin ligase COP1                                                          | 1.23069E-12  |
| Autophagy                                                                                                | 0.012187635  |
| Axon guidance                                                                                            | 0.000501037  |
| B cell receptor signaling pathway                                                                        | 0.000999416  |
| Beta-catenin independent WNT signaling                                                                   | 1.23069E-12  |
| Ca2+ pathway                                                                                             | 0.015478822  |
| cAMP signaling pathway                                                                                   | 5.53949E-05  |
| CASP8 activity is inhibited                                                                              | 0.006176324  |
| Caspase activation via extrinsic apoptotic signalling pathway                                            | 9.69569E-05  |
| CD209 (DC-SIGN) signaling                                                                                | 1.34199E-06  |
| Cdc20:Phospho-APC/C mediated degradation of Cyclin A                                                     | 1.23069E-12  |
| CDK-mediated phosphorylation and removal of Cdc6                                                         | 1.23069E-12  |
| CDT1 association with the CDC6:ORC:origin complex                                                        | 1.23069E-12  |
| Cell cycle                                                                                               | 0.000154315  |
| Cell Cycle Checkpoints                                                                                   | 1.23069E-12  |
| Cell Cycle, Mitotic                                                                                      | 1.23069E-12  |
| Cell surface interactions at the vascular wall                                                           | 0.006176324  |
| Cell-Cell communication                                                                                  | 0.000509235  |
| Cellular response to hypoxia                                                                             | 1.23069E-12  |

|                                                                       |             |
|-----------------------------------------------------------------------|-------------|
| Cellular responses to stress                                          | 1.23069E-12 |
| Centrosome maturation                                                 | 3.50092E-06 |
| Chaperonin-mediated protein folding                                   | 3.50092E-06 |
| Chemokine signaling pathway                                           | 0.003038401 |
| Class I MHC mediated antigen processing & presentation                | 8.86451E-06 |
| CLEC7A (Dectin-1) signaling                                           | 1.23069E-12 |
| Collagen biosynthesis and modifying enzymes                           | 9.26518E-07 |
| Collagen chain trimerization                                          | 9.26518E-07 |
| Collagen degradation                                                  | 9.26518E-07 |
| Collagen formation                                                    | 9.26518E-07 |
| Complement and coagulation cascades                                   | 0.000863323 |
| Constitutive Signaling by AKT1 E17K in Cancer                         | 0.007462562 |
| Cooperation of PDCL (PhLP1) and TRiC/CCT in G-protein beta folding    | 0.000143533 |
| Cooperation of Prefoldin and TriC/CCT in actin and tubulin folding    | 3.50092E-06 |
| COPI-independent Golgi-to-ER retrograde traffic                       | 3.50092E-06 |
| COPI-mediated anterograde transport                                   | 3.50092E-06 |
| CREB phosphorylation                                                  | 1.34199E-06 |
| Cross-presentation of soluble exogenous antigens (endosomes)          | 1.23069E-12 |
| CTLA4 inhibitory signaling                                            | 0.000523836 |
| C-type lectin receptors (CLRs)                                        | 1.23069E-12 |
| Cytokine Signaling in Immune system                                   | 1.23069E-12 |
| DAP12 interactions                                                    | 1.23069E-12 |
| DAP12 signaling                                                       | 1.23069E-12 |
| Death Receptor Signalling                                             | 0.006176324 |
| Dectin-1 mediated noncanonical NF-kB signaling                        | 1.23069E-12 |
| Defective B3GALTL causes Peters-plus syndrome (PpS)                   | 0.000423478 |
| Defective CFTR causes cystic fibrosis                                 | 1.23069E-12 |
| Degradation of AXIN                                                   | 1.23069E-12 |
| Degradation of beta-catenin by the destruction complex                | 1.23069E-12 |
| Degradation of DVL                                                    | 1.23069E-12 |
| Degradation of GLI1 by the proteasome                                 | 1.23069E-12 |
| Degradation of GLI2 by the proteasome                                 | 1.23069E-12 |
| Degradation of the extracellular matrix                               | 6.91075E-09 |
| Deubiquitination                                                      | 1.23069E-12 |
| Developmental Biology                                                 | 2.82745E-06 |
| Dimerization of procaspase-8                                          | 0.006176324 |
| Disease                                                               | 0.000423478 |
| Diseases associated with O-glycosylation of proteins                  | 0.000423478 |
| Diseases associated with the TLR signaling cascade                    | 9.69569E-05 |
| Diseases of glycosylation                                             | 0.000423478 |
| Diseases of Immune System                                             | 9.69569E-05 |
| Diseases of signal transduction                                       | 1.23069E-12 |
| Disinhibition of SNARE formation                                      | 0.047794098 |
| Disorders of transmembrane transporters                               | 1.23069E-12 |
| DNA Replication                                                       | 1.23069E-12 |
| DNA Replication Pre-Initiation                                        | 1.23069E-12 |
| Downstream signal transduction                                        | 1.23069E-12 |
| Downstream signaling events of B Cell Receptor (BCR)                  | 1.23069E-12 |
| Downstream TCR signaling                                              | 1.23069E-12 |
| ECM proteoglycans                                                     | 9.26518E-07 |
| ECM-receptor interaction                                              | 6.43147E-05 |
| Elastic fibre formation                                               | 0.023000815 |
| ER to Golgi Anterograde Transport                                     | 3.50092E-06 |
| ErbB signaling pathway                                                | 2.6995E-05  |
| ERK/MAPK targets                                                      | 1.34199E-06 |
| ER-Phagosome pathway                                                  | 1.23069E-12 |
| Extracellular matrix organization                                     | 6.91075E-09 |
| Factors involved in megakaryocyte development and platelet production | 3.50092E-06 |
| FBXL7 down-regulates AURKA during mitotic entry and in early mitosis  | 1.23069E-12 |

|                                                                             |             |
|-----------------------------------------------------------------------------|-------------|
| Fc epsilon receptor (FCERI) signaling                                       | 1.23069E-12 |
| Fc epsilon RI signaling pathway                                             | 0.000574743 |
| Fc gamma R-mediated phagocytosis                                            | 0.019602279 |
| FCERI mediated MAPK activation                                              | 1.23069E-12 |
| FCERI mediated NF-kB activation                                             | 1.23069E-12 |
| Focal adhesion                                                              | 4.62455E-13 |
| Formation of the cornified envelope                                         | 2.82745E-06 |
| Formation of tubulin folding intermediates by CCT/TriC                      | 3.50092E-06 |
| FoxO signaling pathway                                                      | 4.07829E-14 |
| Frs2-mediated activation                                                    | 1.23069E-12 |
| G alpha (s) signalling events                                               | 0.000143533 |
| G beta:gamma signalling through PLC beta                                    | 0.015478822 |
| G protein gated Potassium channels                                          | 0.015478822 |
| G1/S DNA Damage Checkpoints                                                 | 1.23069E-12 |
| G2/M Checkpoints                                                            | 1.23069E-12 |
| G2/M Transition                                                             | 1.23069E-12 |
| GABA B receptor activation                                                  | 0.000143533 |
| Gap junction                                                                | 0.047454756 |
| Gap junction assembly                                                       | 3.50092E-06 |
| Gap junction trafficking                                                    | 3.50092E-06 |
| Gap junction trafficking and regulation                                     | 3.50092E-06 |
| Gastrin-CREB signalling pathway via PKC and MAPK                            | 1.23069E-12 |
| GLI3 is processed to GLI3R by the proteasome                                | 1.23069E-12 |
| Glucagon-like Peptide-1 (GLP1) regulates insulin secretion                  | 0.015478822 |
| Glucagon-type ligand receptors                                              | 0.015478822 |
| G-protein activation                                                        | 0.000143533 |
| G-protein mediated events                                                   | 0.000143533 |
| GRB2 events in EGFR signaling                                               | 1.23069E-12 |
| Hedgehog ligand biogenesis                                                  | 1.23069E-12 |
| Hedgehog 'off' state                                                        | 1.23069E-12 |
| Hedgehog 'on' state                                                         | 1.23069E-12 |
| Hedgehog signaling pathway                                                  | 0.000182363 |
| Hematopoietic cell lineage                                                  | 0.003169127 |
| Hemostasis                                                                  | 3.50092E-06 |
| Hh mutants abrogate ligand secretion                                        | 1.23069E-12 |
| Hh mutants that don't undergo autocatalytic processing are degraded by ERAD | 1.23069E-12 |
| HIF-1 signaling pathway                                                     | 3.53001E-06 |
| Hippo signaling pathway                                                     | 0.005328066 |
| HIV Transcription Initiation                                                | 0.000344402 |
| Host Interactions of HIV factors                                            | 1.23069E-12 |
| IGF1R signaling cascade                                                     | 1.23069E-12 |
| IKKB deficiency causes SCID                                                 | 0.007462562 |
| IKK complex recruitment mediated by RIP1                                    | 9.69569E-05 |
| IL-17 signaling pathway                                                     | 0.000437571 |
| Immune System                                                               | 8.86451E-06 |
| Incretin synthesis, secretion, and inactivation                             | 0.000143533 |
| Inhibition of voltage gated Ca2+ channels via Gbeta/gamma subunits          | 0.015478822 |
| Inhibition of adenylate cyclase pathway                                     | 0.000143533 |
| Innate Immune System                                                        | 1.23069E-12 |
| Insulin receptor signalling cascade                                         | 1.23069E-12 |
| Insulin resistance                                                          | 0.011394908 |
| Integrin alphaIIb beta3 signaling                                           | 0.000523836 |
| Integrin cell surface interactions                                          | 9.26518E-07 |
| Interleukin receptor SHC signaling                                          | 1.23069E-12 |
| Interleukin-10 signaling                                                    | 1.13141E-05 |
| Interleukin-2 signaling                                                     | 1.23069E-12 |
| Interleukin-3, 5 and GM-CSF signaling                                       | 1.23069E-12 |
| Interleukin-4 and 13 signaling                                              | 1.13141E-05 |
| Inwardly rectifying K+ channels                                             | 0.015478822 |

|                                                                                     |             |
|-------------------------------------------------------------------------------------|-------------|
| IRAK2 mediated activation of TAK1 complex upon TLR7/8 or 9 stimulation              | 9.69569E-05 |
| IRAK4 deficiency (TLR2/4)                                                           | 9.69569E-05 |
| IRS-mediated signalling                                                             | 1.23069E-12 |
| IRS-related events triggered by IGF1R                                               | 1.23069E-12 |
| JNK (c-Jun kinases) phosphorylation and activation mediated by activated human TAK1 | 0.000975181 |
| Keratinization                                                                      | 2.82745E-06 |
| Kinesins                                                                            | 3.50092E-06 |
| L1CAM interactions                                                                  | 3.70615E-07 |
| Ligand-dependent caspase activation                                                 | 9.69569E-05 |
| Longevity regulating pathway                                                        | 0.020245093 |
| Long-term potentiation                                                              | 0.04276411  |
| M Phase                                                                             | 1.23069E-12 |
| M/G1 Transition                                                                     | 1.23069E-12 |
| MAP kinase activation in TLR cascade                                                | 0.000975181 |
| MAP2K and MAPK activation                                                           | 0.02234388  |
| MAPK family signaling cascades                                                      | 1.23069E-12 |
| MAPK signaling pathway                                                              | 1.29202E-11 |
| MAPK targets/ Nuclear events mediated by MAP kinases                                | 1.34199E-06 |
| MAPK1/MAPK3 signaling                                                               | 1.23069E-12 |
| MAPK6/MAPK4 signaling                                                               | 1.23069E-12 |
| MET activates RAS signaling                                                         | 0.02234388  |
| Metabolism of polyamines                                                            | 1.23069E-12 |
| Metabolism of proteins                                                              | 8.86451E-06 |
| MHC class II antigen presentation                                                   | 3.50092E-06 |
| Microtubule-dependent trafficking of connexons from Golgi to the plasma membrane    | 3.50092E-06 |
| Mitotic Anaphase                                                                    | 1.23069E-12 |
| Mitotic G2-G2/M phases                                                              | 1.23069E-12 |
| Mitotic Metaphase and Anaphase                                                      | 1.23069E-12 |
| Mitotic Prometaphase                                                                | 3.50092E-06 |
| Molecules associated with elastic fibres                                            | 0.023000815 |
| mTOR signaling pathway                                                              | 0.012955231 |
| MyD88 cascade initiated on plasma membrane                                          | 0.000975181 |
| MyD88 deficiency (TLR2/4)                                                           | 9.69569E-05 |
| MyD88 dependent cascade initiated on endosome                                       | 9.69569E-05 |
| MyD88:Mal cascade initiated on plasma membrane                                      | 9.69569E-05 |
| MyD88-independent TLR3/TLR4 cascade                                                 | 9.69569E-05 |
| NCAM signaling for neurite out-growth                                               | 1.23069E-12 |
| NCAM1 interactions                                                                  | 9.26518E-07 |
| Negative regulation of MAPK pathway                                                 | 0.02234388  |
| Neurophilin interactions with VEGF and VEGFR                                        | 0.01051389  |
| Neurotrophin signaling pathway                                                      | 3.82536E-06 |
| NF-kappa B signaling pathway                                                        | 0.031587338 |
| NGF signalling via TRKA from the plasma membrane                                    | 1.23069E-12 |
| NIK-->noncanonical NF-kB signaling                                                  | 1.23069E-12 |
| Nuclear Events (kinase and transcription factor activation)                         | 1.34199E-06 |
| O-glycosylation of TSR domain-containing proteins                                   | 0.000423478 |
| O-linked glycosylation                                                              | 0.000423478 |
| Opioid Signalling                                                                   | 0.000143533 |
| Orc1 removal from chromatin                                                         | 1.23069E-12 |
| Osteoclast differentiation                                                          | 9.15186E-09 |
| Oxygen-dependent proline hydroxylation of Hypoxia-inducible Factor Alpha            | 1.23069E-12 |
| Oxytocin signaling pathway                                                          | 0.014168671 |
| p53 signaling pathway                                                               | 0.014248363 |
| p53-Dependent G1 DNA Damage Response                                                | 1.23069E-12 |
| p53-Dependent G1/S DNA damage checkpoint                                            | 1.23069E-12 |
| p53-Independent DNA Damage Response                                                 | 1.23069E-12 |
| p53-Independent G1/S DNA damage checkpoint                                          | 1.23069E-12 |
| PCP/CE pathway                                                                      | 1.23069E-12 |
| Peptide hormone metabolism                                                          | 0.000143533 |

|                                                                     |             |
|---------------------------------------------------------------------|-------------|
| PI3K-Akt signaling pathway                                          | 1.46068E-13 |
| Platelet activation                                                 | 0.019919175 |
| Platelet activation, signaling and aggregation                      | 0.000143533 |
| Platelet Aggregation (Plug Formation)                               | 0.000523836 |
| PLC beta mediated events                                            | 0.000143533 |
| Post-chaperonin tubulin folding pathway                             | 3.50092E-06 |
| Post-translational protein modification                             | 8.86451E-06 |
| Presynaptic function of Kainate receptors                           | 0.015478822 |
| Progesterone-mediated oocyte maturation                             | 0.035485862 |
| Programmed Cell Death                                               | 2.5354E-05  |
| Prolactin signaling pathway                                         | 0.003905837 |
| Prolonged ERK activation events                                     | 1.23069E-12 |
| Prostacyclin signalling through prostacyclin receptor               | 0.015478822 |
| Protein folding                                                     | 3.50092E-06 |
| Protein ubiquitination                                              | 8.86451E-06 |
| RAF/MAP kinase cascade                                              | 1.23069E-12 |
| Rap1 signaling pathway                                              | 2.80626E-08 |
| RAS signaling downstream of NF1 loss-of-function variants           | 0.02234388  |
| Ras signaling pathway                                               | 1.89757E-08 |
| Recruitment of mitotic centrosome proteins and complexes            | 3.50092E-06 |
| Recruitment of NuMA to mitotic centrosomes                          | 3.50092E-06 |
| Recycling pathway of L1                                             | 3.70615E-07 |
| Regulated Necrosis                                                  | 0.006176324 |
| Regulation by c-FLIP                                                | 0.006176324 |
| Regulation of actin cytoskeleton                                    | 0.000240316 |
| Regulation of activated PAK-2p34 by proteasome mediated degradation | 1.23069E-12 |
| Regulation of APC/C activators between G1/S and early anaphase      | 1.23069E-12 |
| Regulation of Apoptosis                                             | 2.5354E-05  |
| Regulation of DNA replication                                       | 1.23069E-12 |
| Regulation of Hypoxia-inducible Factor (HIF) by oxygen              | 1.23069E-12 |
| Regulation of mitotic cell cycle                                    | 1.23069E-12 |
| Regulation of mRNA stability by proteins that bind AU-rich elements | 1.23069E-12 |
| Regulation of necroptotic cell death                                | 0.006176324 |
| Regulation of ornithine decarboxylase (ODC)                         | 1.23069E-12 |
| Regulation of PAK-2p34 activity by PS-GAP/RHG10                     | 2.5354E-05  |
| Regulation of RAS by GAPs                                           | 1.23069E-12 |
| Regulation of TLR by endogenous ligand                              | 9.69569E-05 |
| Regulation of TP53 Activity                                         | 5.50978E-06 |
| Regulation of TP53 Activity through Phosphorylation                 | 0.000344402 |
| Regulation of TP53 Degradation                                      | 5.50978E-06 |
| Regulation of TP53 Expression and Degradation                       | 5.50978E-06 |
| Removal of licensing factors from origins                           | 1.23069E-12 |
| Resolution of Sister Chromatid Cohesion                             | 3.50092E-06 |
| Response to elevated platelet cytosolic Ca2+                        | 0.047794098 |
| RET signaling                                                       | 1.23069E-12 |
| Rho GTPase cycle                                                    | 2.5354E-05  |
| RHO GTPases Activate Formins                                        | 3.50092E-06 |
| RHO GTPases activate IQGAPs                                         | 3.50092E-06 |
| RIPK1-mediated regulated necrosis                                   | 0.006176324 |
| RNA Polymerase II HIV Promoter Escape                               | 0.000344402 |
| RNA Polymerase II Promoter Escape                                   | 0.000344402 |
| RNA Polymerase II Transcription Initiation                          | 0.000344402 |
| RNA Polymerase II Transcription Initiation And Promoter Clearance   | 0.000344402 |
| RNA Polymerase II Transcription Pre-Initiation And Promoter Opening | 0.000344402 |
| RSK activation                                                      | 0.000523836 |
| S Phase                                                             | 1.23069E-12 |
| SCF-beta-TrCP mediated degradation of Emi1                          | 1.23069E-12 |
| Sema3A PAK dependent Axon repulsion                                 | 0.01051389  |
| SEMA3A-Plexin repulsion signaling by inhibiting Integrin adhesion   | 0.01051389  |

|                                                                              |             |
|------------------------------------------------------------------------------|-------------|
| Separation of Sister Chromatids                                              | 1.23069E-12 |
| SHC1 events in EGFR signaling                                                | 1.23069E-12 |
| SHC-related events triggered by IGF1R                                        | 0.02234388  |
| Signal amplification                                                         | 0.000143533 |
| Signal regulatory protein (SIRP) family interactions                         | 0.000509235 |
| Signal Transduction                                                          | 2.5354E-05  |
| Signal transduction by L1                                                    | 0.01051389  |
| Signaling by EGFR                                                            | 1.23069E-12 |
| Signaling by FGFR3 fusions in cancer                                         | 0.02234388  |
| Signaling by FGFR4 in disease                                                | 0.02234388  |
| Signaling by Hedgehog                                                        | 1.23069E-12 |
| Signaling by high-kinase activity BRAF mutants                               | 0.02234388  |
| Signaling by Insulin receptor                                                | 1.23069E-12 |
| Signaling by Interleukins                                                    | 1.23069E-12 |
| Signaling by Leptin                                                          | 1.23069E-12 |
| Signaling by PDGF                                                            | 1.23069E-12 |
| Signaling by Rho GTPases                                                     | 2.5354E-05  |
| Signaling by SCF-KIT                                                         | 1.23069E-12 |
| Signaling by the B Cell Receptor (BCR)                                       | 1.23069E-12 |
| Signaling by Type 1 Insulin-like Growth Factor 1 Receptor (IGF1R)            | 1.23069E-12 |
| Signaling by VEGF                                                            | 1.23069E-12 |
| Signaling by Wnt                                                             | 1.23069E-12 |
| Signaling pathways regulating pluripotency of stem cells                     | 8.14166E-05 |
| Signalling to ERKs                                                           | 1.23069E-12 |
| Signalling to p38 via RIT and RIN                                            | 1.23069E-12 |
| Signalling to RAS                                                            | 1.23069E-12 |
| SOS-mediated signalling                                                      | 1.23069E-12 |
| Stabilization of p53                                                         | 1.23069E-12 |
| Switching of origins to a post-replicative state                             | 1.23069E-12 |
| Syndecan interactions                                                        | 0.013439221 |
| Synthesis of active ubiquitin: roles of E1 and E2 enzymes                    | 8.86451E-06 |
| Synthesis of DNA                                                             | 1.23069E-12 |
| Synthesis, secretion, and inactivation of Glucagon-like Peptide-1 (GLP-1)    | 0.000143533 |
| T cell receptor signaling pathway                                            | 1.82277E-07 |
| TCF dependent signaling in response to WNT                                   | 1.23069E-12 |
| TCR signaling                                                                | 1.23069E-12 |
| TGF-beta signaling pathway                                                   | 0.007916254 |
| Th1 and Th2 cell differentiation                                             | 0.001562264 |
| Th17 cell differentiation                                                    | 1.27716E-08 |
| The role of GTSE1 in G2/M progression after G2 checkpoint                    | 1.23069E-12 |
| Thromboxane signalling through TP receptor                                   | 0.015478822 |
| Thyroid hormone signaling pathway                                            | 0.000756156 |
| Tight junction                                                               | 0.000289417 |
| TNF signaling pathway                                                        | 0.012714665 |
| TNFR2 non-canonical NF-kB pathway                                            | 1.23069E-12 |
| Toll Like Receptor 10 (TLR10) Cascade                                        | 0.000975181 |
| Toll Like Receptor 2 (TLR2) Cascade                                          | 9.69569E-05 |
| Toll Like Receptor 3 (TLR3) Cascade                                          | 9.69569E-05 |
| Toll Like Receptor 4 (TLR4) Cascade                                          | 9.69569E-05 |
| Toll Like Receptor 5 (TLR5) Cascade                                          | 0.000975181 |
| Toll Like Receptor 7/8 (TLR7/8) Cascade                                      | 9.69569E-05 |
| Toll Like Receptor 9 (TLR9) Cascade                                          | 9.69569E-05 |
| Toll Like Receptor TLR1:TLR2 Cascade                                         | 9.69569E-05 |
| Toll Like Receptor TLR6:TLR2 Cascade                                         | 9.69569E-05 |
| Toll-like receptor signaling pathway                                         | 0.000133836 |
| Toll-Like Receptors Cascades                                                 | 9.69569E-05 |
| TP53 Regulates Transcription of Cell Death Genes                             | 0.006176324 |
| TP53 Regulates Transcription of Death Receptors and Ligands                  | 0.006176324 |
| TRAF6 mediated induction of NFkB and MAP kinases upon TLR7/8 or 9 activation | 9.69569E-05 |

|                                                              |             |
|--------------------------------------------------------------|-------------|
| TRAF6 mediated induction of TAK1 complex                     | 9.69569E-05 |
| TRAIL signaling                                              | 0.006176324 |
| Translocation of GLUT4 to the plasma membrane                | 3.50092E-06 |
| Transport of connexons to the plasma membrane                | 3.50092E-06 |
| Transport to the Golgi and subsequent modification           | 3.50092E-06 |
| TRIF-mediated programmed cell death                          | 9.69569E-05 |
| TRIF-mediated TLR3/TLR4 signaling                            | 9.69569E-05 |
| Ubiquitin Mediated Degradation of Phosphorylated Cdc25A      | 1.23069E-12 |
| Ubiquitin-dependent degradation of Cyclin D                  | 1.23069E-12 |
| Ubiquitin-dependent degradation of Cyclin D1                 | 1.23069E-12 |
| Ub-specific processing proteases                             | 1.23069E-12 |
| UCH proteinases                                              | 1.23069E-12 |
| Uptake and actions of bacterial toxins                       | 0.000975181 |
| Uptake and function of anthrax toxins                        | 0.000975181 |
| Vasopressin regulates renal water homeostasis via Aquaporins | 0.015478822 |
| VEGF signaling pathway                                       | 0.002636991 |
| VEGFA-VEGFR2 Pathway                                         | 1.23069E-12 |
| VEGFR2 mediated cell proliferation                           | 1.23069E-12 |
| VEGFR2 mediated vascular permeability                        | 0.000523836 |
| Vif-mediated degradation of APOBEC3G                         | 1.23069E-12 |
| Vpu mediated degradation of CD4                              | 1.23069E-12 |
| Wnt signaling pathway                                        | 4.17868E-09 |
