# Supplementary material for: A systematic integrative approach reveals novel microRNAs in diabetic nephropathy
Source: PubMed Central journal article supplement — J Res Med Sci. 2020 Jan 20;25:1. doi: 10.4103/jrms.JRMS_289_19 (PMC7003547; doi:10.4103/jrms.jrms_289_19), 2020-01-20
Supplement: JRMS-25-1_Suppl4.pdf [file JRMS-25-1_Suppl4.pdf]

**Supplementary Table 5:** Pathway enrichment analysis of the tubulointerstitium dataset. Signaling pathway related to the DE gene, TFs, and kinase of the tubulointerstitium network were determined. Adj. P-value $\leq$ 0.05 was considered as statistical significance threshold.

| Pathways                                                             | adj. p-value |
|----------------------------------------------------------------------|--------------|
| Signaling by the B Cell Receptor (BCR)                               | 6.28043E-24  |
| Interleukin receptor SHC signaling                                   | 6.28043E-24  |
| FBXL7 down-regulates AURKA during mitotic entry and in early mitosis | 6.28043E-24  |
| RET signaling                                                        | 6.28043E-24  |
| Gastrin-CREB signalling pathway via PKC and MAPK                     | 6.28043E-24  |
| Signaling by Insulin receptor                                        | 6.28043E-24  |
| Insulin receptor signalling cascade                                  | 6.28043E-24  |
| Cell Cycle Checkpoints                                               | 6.28043E-24  |
| DNA Replication                                                      | 6.28043E-24  |
| Regulation of DNA replication                                        | 6.28043E-24  |
| Removal of licensing factors from origins                            | 6.28043E-24  |
| Cell Cycle, Mitotic                                                  | 6.28043E-24  |
| CDT1 association with the CDC6:ORC:origin complex                    | 6.28043E-24  |
| Ub-specific processing proteases                                     | 6.28043E-24  |
| UCH proteinases                                                      | 6.28043E-24  |
| Deubiquitination                                                     | 6.28043E-24  |
| MAPK family signaling cascades                                       | 6.28043E-24  |
| Defective CFTR causes cystic fibrosis                                | 6.28043E-24  |
| NIK-->noncanonical NF-kB signaling                                   | 6.28043E-24  |
| RAF/MAP kinase cascade                                               | 6.28043E-24  |
| TNFR2 non-canonical NF-kB pathway                                    | 6.28043E-24  |
| Regulation of RAS by GAPs                                            | 6.28043E-24  |
| C-type lectin receptors (CLRs)                                       | 6.28043E-24  |
| CLEC7A (Dectin-1) signaling                                          | 6.28043E-24  |
| Dectin-1 mediated noncanonical NF-kB signaling                       | 6.28043E-24  |
| Signaling by Hedgehog                                                | 6.28043E-24  |
| VEGFR2 mediated cell proliferation                                   | 6.28043E-24  |
| Interleukin-3, 5 and GM-CSF signaling                                | 6.28043E-24  |
| Degradation of DVL                                                   | 6.28043E-24  |
| Degradation of AXIN                                                  | 6.28043E-24  |
| Asymmetric localization of PCP proteins                              | 6.28043E-24  |
| Regulation of mitotic cell cycle                                     | 6.28043E-24  |
| Regulation of mRNA stability by proteins that bind AU-rich elements  | 6.28043E-24  |
| AUF1 (hnRNP D0) binds and destabilizes mRNA                          | 6.28043E-24  |
| Signaling by Interleukins                                            | 6.28043E-24  |
| VEGFA-VEGFR2 Pathway                                                 | 6.28043E-24  |
| PCP/CE pathway                                                       | 6.28043E-24  |
| Beta-catenin independent WNT signaling                               | 6.28043E-24  |
| ABC-family proteins mediated transport                               | 6.28043E-24  |
| NCAM signaling for neurite out-growth                                | 6.28043E-24  |
| Metabolism of polyamines                                             | 6.28043E-24  |
| Regulation of ornithine decarboxylase (ODC)                          | 6.28043E-24  |
| Autodegradation of the E3 ubiquitin ligase COP1                      | 6.28043E-24  |
| FCERI mediated NF-kB activation                                      | 6.28043E-24  |
| FCERI mediated MAPK activation                                       | 6.28043E-24  |
| Signaling by Leptin                                                  | 6.28043E-24  |
| Mitotic Metaphase and Anaphase                                       | 6.28043E-24  |
| Separation of Sister Chromatids                                      | 6.28043E-24  |
| Fc epsilon receptor (FCERI) signaling                                | 6.28043E-24  |
| IRS-related events triggered by IGF1R                                | 6.28043E-24  |
| IGF1R signaling cascade                                              | 6.28043E-24  |
| DAP12 signaling                                                      | 6.28043E-24  |
| Signaling by Type 1 Insulin-like Growth Factor 1 Receptor (IGF1R)    | 6.28043E-24  |
| Cellular responses to stress                                         | 6.28043E-24  |

|                                                                                                          |             |
|----------------------------------------------------------------------------------------------------------|-------------|
| Cellular response to hypoxia                                                                             | 6.28043E-24 |
| DAP12 interactions                                                                                       | 6.28043E-24 |
| Regulation of activated PAK-2p34 by proteasome mediated degradation                                      | 6.28043E-24 |
| Downstream TCR signaling                                                                                 | 6.28043E-24 |
| TCR signaling                                                                                            | 6.28043E-24 |
| TCF dependent signaling in response to WNT                                                               | 6.28043E-24 |
| Signaling by Wnt                                                                                         | 6.28043E-24 |
| Degradation of beta-catenin by the destruction complex                                                   | 6.28043E-24 |
| Signaling by VEGF                                                                                        | 6.28043E-24 |
| Signalling to p38 via RIT and RIN                                                                        | 6.28043E-24 |
| Signalling to ERKs                                                                                       | 6.28043E-24 |
| NGF signalling via TRKA from the plasma membrane                                                         | 6.28043E-24 |
| Signaling by PDGF                                                                                        | 6.28043E-24 |
| Downstream signal transduction                                                                           | 6.28043E-24 |
| Vif-mediated degradation of APOBEC3G                                                                     | 6.28043E-24 |
| Vpu mediated degradation of CD4                                                                          | 6.28043E-24 |
| SHC1 events in EGFR signaling                                                                            | 6.28043E-24 |
| GRB2 events in EGFR signaling                                                                            | 6.28043E-24 |
| APC:Cdc20 mediated degradation of cell cycle proteins prior to satisfaction of the cell cycle checkpoint | 6.28043E-24 |
| Signaling by EGFR                                                                                        | 6.28043E-24 |
| Activation of APC/C and APC/C:Cdc20 mediated degradation of mitotic proteins                             | 6.28043E-24 |
| APC/C:Cdc20 mediated degradation of mitotic proteins                                                     | 6.28043E-24 |
| Regulation of APC/C activators between G1/S and early anaphase                                           | 6.28043E-24 |
| Cdc20:Phospho-APC/C mediated degradation of Cyclin A                                                     | 6.28043E-24 |
| APC/C:Cdh1 mediated degradation of Cdc20 and other APC/C:Cdh1 targeted proteins in late mitosis/early G1 | 6.28043E-24 |
| APC/C:Cdc20 mediated degradation of Securin                                                              | 6.28043E-24 |
| APC/C-mediated degradation of cell cycle proteins                                                        | 6.28043E-24 |
| SCF-beta-TrCP mediated degradation of Emi1                                                               | 6.28043E-24 |
| ARMS-mediated activation                                                                                 | 6.28043E-24 |
| Frs2-mediated activation                                                                                 | 6.28043E-24 |
| Prolonged ERK activation events                                                                          | 6.28043E-24 |
| Innate Immune System                                                                                     | 6.28043E-24 |
| Signalling to RAS                                                                                        | 6.28043E-24 |
| Host Interactions of HIV factors                                                                         | 6.28043E-24 |
| Signaling by SCF-KIT                                                                                     | 6.28043E-24 |
| Cytokine Signaling in Immune system                                                                      | 6.28043E-24 |
| Cross-presentation of soluble exogenous antigens (endosomes)                                             | 6.28043E-24 |
| Antigen processing-Cross presentation                                                                    | 6.28043E-24 |
| ER-Phagosome pathway                                                                                     | 6.28043E-24 |
| Oxygen-dependent proline hydroxylation of Hypoxia-inducible Factor Alpha                                 | 6.28043E-24 |
| Regulation of Hypoxia-inducible Factor (HIF) by oxygen                                                   | 6.28043E-24 |
| Activation of NF-kappaB in B cells                                                                       | 6.28043E-24 |
| Downstream signaling events of B Cell Receptor (BCR)                                                     | 6.28043E-24 |
| SOS-mediated signalling                                                                                  | 6.28043E-24 |
| IRS-mediated signalling                                                                                  | 6.28043E-24 |
| Class I MHC mediated antigen processing & presentation                                                   | 3.01819E-17 |
| Antigen processing: Ubiquitination & Proteasome degradation                                              | 3.01819E-17 |
| Synthesis of active ubiquitin: roles of E1 and E2 enzymes                                                | 3.01819E-17 |
| Protein ubiquitination                                                                                   | 3.01819E-17 |
| Post-translational protein modification                                                                  | 3.01819E-17 |
| Metabolism of proteins                                                                                   | 3.01819E-17 |
| Immune System                                                                                            | 3.01819E-17 |
| Adaptive Immune System                                                                                   | 3.01819E-17 |
| Th17 cell differentiation                                                                                | 1.76393E-13 |
| Factors involved in megakaryocyte development and platelet production                                    | 2.02934E-13 |
| Kinesins                                                                                                 | 2.02934E-13 |
| Transport to the Golgi and subsequent modification                                                       | 2.02934E-13 |
| Mitotic Prometaphase                                                                                     | 2.02934E-13 |
| COPI-independent Golgi-to-ER retrograde traffic                                                          | 2.02934E-13 |

|                                                                                  |             |
|----------------------------------------------------------------------------------|-------------|
| COPI-mediated anterograde transport                                              | 2.02934E-13 |
| RHO GTPases Activate Formins                                                     | 2.02934E-13 |
| RHO GTPases activate IQGAPs                                                      | 2.02934E-13 |
| Protein folding                                                                  | 2.02934E-13 |
| Chaperonin-mediated protein folding                                              | 2.02934E-13 |
| Post-chaperonin tubulin folding pathway                                          | 2.02934E-13 |
| Formation of tubulin folding intermediates by CCT/TriC                           | 2.02934E-13 |
| Cooperation of Prefoldin and TriC/CCT in actin and tubulin folding               | 2.02934E-13 |
| Recruitment of NuMA to mitotic centrosomes                                       | 2.02934E-13 |
| Centrosome maturation                                                            | 2.02934E-13 |
| Recruitment of mitotic centrosome proteins and complexes                         | 2.02934E-13 |
| Resolution of Sister Chromatid Cohesion                                          | 2.02934E-13 |
| MHC class II antigen presentation                                                | 2.02934E-13 |
| ER to Golgi Anterograde Transport                                                | 2.02934E-13 |
| Transport of connexons to the plasma membrane                                    | 2.02934E-13 |
| Gap junction assembly                                                            | 2.02934E-13 |
| Microtubule-dependent trafficking of connexons from Golgi to the plasma membrane | 2.02934E-13 |
| Gap junction trafficking                                                         | 2.02934E-13 |
| Gap junction trafficking and regulation                                          | 2.02934E-13 |
| Translocation of GLUT4 to the plasma membrane                                    | 2.02934E-13 |
| Hemostasis                                                                       | 2.02934E-13 |
| FoxO signaling pathway                                                           | 8.21666E-13 |
| CD209 (DC-SIGN) signaling                                                        | 3.41279E-12 |
| MAPK targets/ Nuclear events mediated by MAP kinases                             | 3.41279E-12 |
| CREB phosphorylation                                                             | 3.41279E-12 |
| ERK/MAPK targets                                                                 | 3.41279E-12 |
| Nuclear Events (kinase and transcription factor activation)                      | 3.41279E-12 |
| AGE-RAGE signaling pathway in diabetic complications                             | 8.39824E-11 |
| Wnt signaling pathway                                                            | 1.00197E-10 |
| Adherens junction                                                                | 2.07436E-10 |
| MAPK signaling pathway                                                           | 3.63208E-10 |
| Focal adhesion                                                                   | 6.08886E-10 |
| Thyroid hormone signaling pathway                                                | 3.13688E-09 |
| O-glycosylation of TSR domain-containing proteins                                | 3.42568E-09 |
| O-linked glycosylation                                                           | 3.42568E-09 |
| Defective B3GALTL causes Peters-plus syndrome (PpS)                              | 3.42568E-09 |
| Diseases associated with O-glycosylation of proteins                             | 3.42568E-09 |
| Diseases of glycosylation                                                        | 3.42568E-09 |
| Disease                                                                          | 3.42568E-09 |
| Cell cycle                                                                       | 5.9193E-09  |
| Recycling pathway of L1                                                          | 3.23407E-08 |
| L1CAM interactions                                                               | 3.23407E-08 |
| Interferon gamma signaling                                                       | 1.21298E-07 |
| Th1 and Th2 cell differentiation                                                 | 2.17982E-07 |
| IRAK2 mediated activation of TAK1 complex upon TLR7/8 or 9 stimulation           | 2.33762E-07 |
| MyD88 dependent cascade initiated on endosome                                    | 2.33762E-07 |
| TRAF6 mediated induction of NFkB and MAP kinases upon TLR7/8 or 9 activation     | 2.33762E-07 |
| TRAF6 mediated induction of TAK1 complex                                         | 2.33762E-07 |
| TRIF-mediated TLR3/TLR4 signaling                                                | 2.33762E-07 |
| IKK complex recruitment mediated by RIP1                                         | 2.33762E-07 |
| Activation of IRF3/IRF7 mediated by TBK1/IKK epsilon                             | 2.33762E-07 |
| Regulation of TLR by endogenous ligand                                           | 2.33762E-07 |
| IRAK4 deficiency (TLR2/4)                                                        | 2.33762E-07 |
| MyD88 deficiency (TLR2/4)                                                        | 2.33762E-07 |
| Diseases associated with the TLR signaling cascade                               | 2.33762E-07 |
| Caspase activation via extrinsic apoptotic signalling pathway                    | 2.33762E-07 |
| Diseases of Immune System                                                        | 2.33762E-07 |
| TRIF-mediated programmed cell death                                              | 2.33762E-07 |
| Toll Like Receptor 2 (TLR2) Cascade                                              | 2.33762E-07 |

|                                                                                                                  |             |
|------------------------------------------------------------------------------------------------------------------|-------------|
| Toll-Like Receptors Cascades                                                                                     | 2.33762E-07 |
| Toll Like Receptor TLR6:TLR2 Cascade                                                                             | 2.33762E-07 |
| Toll Like Receptor 7/8 (TLR7/8) Cascade                                                                          | 2.33762E-07 |
| Toll Like Receptor TLR1:TLR2 Cascade                                                                             | 2.33762E-07 |
| Toll Like Receptor 3 (TLR3) Cascade                                                                              | 2.33762E-07 |
| Toll Like Receptor 9 (TLR9) Cascade                                                                              | 2.33762E-07 |
| MyD88-independent TLR3/TLR4 cascade                                                                              | 2.33762E-07 |
| MyD88:Mal cascade initiated on plasma membrane                                                                   | 2.33762E-07 |
| Activated TLR4 signalling                                                                                        | 2.33762E-07 |
| Toll Like Receptor 4 (TLR4) Cascade                                                                              | 2.33762E-07 |
| Ligand-dependent caspase activation                                                                              | 2.33762E-07 |
| PI3K-Akt signaling pathway                                                                                       | 3.10742E-07 |
| Signaling pathways regulating pluripotency of stem cells                                                         | 8.39382E-07 |
| Axon guidance                                                                                                    | 1.65612E-06 |
| Sphingolipid signaling pathway                                                                                   | 1.89951E-06 |
| Neutrophil degranulation                                                                                         | 3.01632E-06 |
| Interleukin-4 and 13 signaling                                                                                   | 4.9624E-06  |
| Interleukin-10 signaling                                                                                         | 4.9624E-06  |
| Platelet activation                                                                                              | 5.65449E-06 |
| IL-17 signaling pathway                                                                                          | 6.03235E-06 |
| Osteoclast differentiation                                                                                       | 6.47348E-06 |
| Gap junction                                                                                                     | 7.36104E-06 |
| Neurotrophin signaling pathway                                                                                   | 9.00301E-06 |
| Response to elevated platelet cytosolic Ca <sup>2+</sup>                                                         | 9.58875E-06 |
| Disinhibition of SNARE formation                                                                                 | 9.58875E-06 |
| Long-term potentiation                                                                                           | 1.06086E-05 |
| Formation of the cornified envelope                                                                              | 1.43845E-05 |
| Keratinization                                                                                                   | 1.43845E-05 |
| Developmental Biology                                                                                            | 1.43845E-05 |
| Phagosome                                                                                                        | 1.46729E-05 |
| ErbB signaling pathway                                                                                           | 1.91926E-05 |
| Regulation of actin cytoskeleton                                                                                 | 2.20261E-05 |
| Prolactin signaling pathway                                                                                      | 2.55587E-05 |
| Apoptosis                                                                                                        | 2.97138E-05 |
| Antigen processing and presentation                                                                              | 3.70117E-05 |
| Oxytocin signaling pathway                                                                                       | 3.93962E-05 |
| Activation of the AP-1 family of transcription factors                                                           | 4.73919E-05 |
| TP53 regulates transcription of additional cell cycle genes whose exact role in the p53 pathway remain uncertain | 5.35978E-05 |
| TP53 Regulates Transcription of Cell Cycle Genes                                                                 | 5.35978E-05 |
| Deadenylation of mRNA                                                                                            | 5.35978E-05 |
| Deadenylation-dependent mRNA decay                                                                               | 5.35978E-05 |
| Transcriptional Regulation by TP53                                                                               | 5.35978E-05 |
| Chemokine signaling pathway                                                                                      | 6.16943E-05 |
| GnRH signaling pathway                                                                                           | 7.90804E-05 |
| p53 signaling pathway                                                                                            | 9.04514E-05 |
| Endocytosis                                                                                                      | 0.00011384  |
| Platelet degranulation                                                                                           | 0.0001457   |
| Progesterone-mediated oocyte maturation                                                                          | 0.000188012 |
| T cell receptor signaling pathway                                                                                | 0.00021586  |
| NOD-like receptor signaling pathway                                                                              | 0.000231561 |
| Cell adhesion molecules (CAMs)                                                                                   | 0.00030561  |
| Fc epsilon RI signaling pathway                                                                                  | 0.00030977  |
| Rap1 signaling pathway                                                                                           | 0.000327757 |
| Regulation of TP53 Expression and Degradation                                                                    | 0.000416377 |
| Regulation of TP53 Degradation                                                                                   | 0.000416377 |
| Regulation of TP53 Activity                                                                                      | 0.000416377 |
| KSRP (KHSRP) binds and destabilizes mRNA                                                                         | 0.00042258  |
| PERK regulates gene expression                                                                                   | 0.00042258  |
| ATF4 activates genes                                                                                             | 0.00042258  |

|                                                                            |             |
|----------------------------------------------------------------------------|-------------|
| Generation of second messenger molecules                                   | 0.00042258  |
| B cell receptor signaling pathway                                          | 0.000645314 |
| Oocyte meiosis                                                             | 0.000876249 |
| Cyclin A/B1 associated events during G2/M transition                       | 0.000888089 |
| HuR (ELAVL1) binds and stabilizes mRNA                                     | 0.000888089 |
| TGF-beta receptor signaling activates SMADs                                | 0.000888089 |
| Downregulation of TGF-beta receptor signaling                              | 0.000888089 |
| Interactions of Rev with host cellular proteins                            | 0.000888089 |
| NEP/NS2 Interacts with the Cellular Export Machinery                       | 0.000888089 |
| Export of Viral Ribonucleoproteins from Nucleus                            | 0.000888089 |
| Rev-mediated nuclear export of HIV RNA                                     | 0.000888089 |
| Protein processing in endoplasmic reticulum                                | 0.000888641 |
| Downregulation of ERBB2 signaling                                          | 0.000947433 |
| Signaling by PTK6                                                          | 0.000947433 |
| ERBB2 Activates PTK6 Signaling                                             | 0.000947433 |
| ERBB2 Regulates Cell Motility                                              | 0.000947433 |
| PI3K events in ERBB2 signaling                                             | 0.000947433 |
| GRB2 events in ERBB2 signaling                                             | 0.000947433 |
| Downregulation of ERBB2:ERBB3 signaling                                    | 0.000947433 |
| GRB7 events in ERBB2 signaling                                             | 0.000947433 |
| Nuclear signaling by ERBB4                                                 | 0.000947433 |
| SHC1 events in ERBB4 signaling                                             | 0.000947433 |
| PI3K events in ERBB4 signaling                                             | 0.000947433 |
| SHC1 events in ERBB2 signaling                                             | 0.000947433 |
| Signaling by ERBB4                                                         | 0.000947433 |
| Signaling by ERBB2                                                         | 0.000947433 |
| SUMOylation of RNA binding proteins                                        | 0.001045166 |
| SUMO E3 ligases SUMOylate target proteins                                  | 0.001045166 |
| SUMOylation of DNA damage response and repair proteins                     | 0.001045166 |
| SUMOylation                                                                | 0.001045166 |
| Cellular Senescence                                                        | 0.001045166 |
| Oxidative Stress Induced Senescence                                        | 0.001045166 |
| Antigen Presentation: Folding, assembly and peptide loading of class I MHC | 0.00106206  |
| Insulin resistance                                                         | 0.001518524 |
| Circadian Clock                                                            | 0.001627753 |
| BMAL1:CLOCK,NPAS2 activates circadian gene expression                      | 0.001627753 |
| RORA activates gene expression                                             | 0.001627753 |
| TNF signaling pathway                                                      | 0.001801132 |
| Inhibition of adenylate cyclase pathway                                    | 0.00236097  |
| Activation of GABAB receptors                                              | 0.00236097  |
| GABA B receptor activation                                                 | 0.00236097  |
| Platelet activation, signaling and aggregation                             | 0.00236097  |
| Cooperation of PDCL (PhLP1) and TRiC/CCT in G-protein beta folding         | 0.00236097  |
| G alpha (s) signalling events                                              | 0.00236097  |
| Incretin synthesis, secretion, and inactivation                            | 0.00236097  |
| Signal amplification                                                       | 0.00236097  |
| ADP signalling through P2Y purinoceptor 12                                 | 0.00236097  |
| Synthesis, secretion, and inactivation of Glucagon-like Peptide-1 (GLP-1)  | 0.00236097  |
| Peptide hormone metabolism                                                 | 0.00236097  |
| G-protein activation                                                       | 0.00236097  |
| Adenylate cyclase inhibitory pathway                                       | 0.00236097  |
| PLC beta mediated events                                                   | 0.00236097  |
| G-protein mediated events                                                  | 0.00236097  |
| Opioid Signalling                                                          | 0.00236097  |
| Interferon Signaling                                                       | 0.002596513 |
| NS1 Mediated Effects on Host Pathways                                      | 0.002596513 |
| Influenza Infection                                                        | 0.002596513 |
| Host Interactions with Influenza Factors                                   | 0.002596513 |
| Antiviral mechanism by IFN-stimulated genes                                | 0.002596513 |

|                                                                                     |             |
|-------------------------------------------------------------------------------------|-------------|
| ISG15 antiviral mechanism                                                           | 0.002596513 |
| Inflammatory mediator regulation of TRP channels                                    | 0.002703184 |
| Toll-like receptor signaling pathway                                                | 0.002846288 |
| Hippo signaling pathway                                                             | 0.003300545 |
| RNA Polymerase II Transcription Initiation And Promoter Clearance                   | 0.004081855 |
| RNA Polymerase II Transcription Initiation                                          | 0.004081855 |
| RNA Polymerase II Transcription Pre-Initiation And Promoter Opening                 | 0.004081855 |
| RNA Polymerase II Promoter Escape                                                   | 0.004081855 |
| Regulation of TP53 Activity through Phosphorylation                                 | 0.004081855 |
| RNA Polymerase II HIV Promoter Escape                                               | 0.004081855 |
| HIV Transcription Initiation                                                        | 0.004081855 |
| Leukocyte transendothelial migration                                                | 0.004755329 |
| CRMPs in Sema3A signaling                                                           | 0.004971413 |
| Semaphorin interactions                                                             | 0.004971413 |
| HIF-1 signaling pathway                                                             | 0.005324622 |
| MyD88 cascade initiated on plasma membrane                                          | 0.005437394 |
| Uptake and actions of bacterial toxins                                              | 0.005437394 |
| Uptake and function of anthrax toxins                                               | 0.005437394 |
| JNK (c-Jun kinases) phosphorylation and activation mediated by activated human TAK1 | 0.005437394 |
| MAP kinase activation in TLR cascade                                                | 0.005437394 |
| Toll Like Receptor 5 (TLR5) Cascade                                                 | 0.005437394 |
| Toll Like Receptor 10 (TLR10) Cascade                                               | 0.005437394 |
| YAP1- and WWTR1 (TAZ)-stimulated gene expression                                    | 0.005533448 |
| NF-kappa B signaling pathway                                                        | 0.006023459 |
| Autophagy                                                                           | 0.00702112  |
| Apelin signaling pathway                                                            | 0.00752721  |
| mTOR signaling pathway                                                              | 0.009298888 |
| Fc gamma R-mediated phagocytosis                                                    | 0.009585428 |
| Estrogen signaling pathway                                                          | 0.00986996  |
| TRAIL signaling                                                                     | 0.010303802 |
| Death Receptor Signalling                                                           | 0.010303802 |
| Dimerization of procaspase-8                                                        | 0.010303802 |
| TP53 Regulates Transcription of Death Receptors and Ligands                         | 0.010303802 |
| Regulation of necroptotic cell death                                                | 0.010303802 |
| TP53 Regulates Transcription of Cell Death Genes                                    | 0.010303802 |
| CASP8 activity is inhibited                                                         | 0.010303802 |
| Regulated Necrosis                                                                  | 0.010303802 |
| RIPK1-mediated regulated necrosis                                                   | 0.010303802 |
| Regulation by c-FLIP                                                                | 0.010303802 |
| Cell surface interactions at the vascular wall                                      | 0.010303802 |
| Listeria monocytogenes entry into host cells                                        | 0.01128247  |
| InlB-mediated entry of Listeria monocytogenes into host cell                        | 0.01128247  |
| Negative regulation of MET activity                                                 | 0.01128247  |
| Signaling by MET                                                                    | 0.01128247  |
| EGFR downregulation                                                                 | 0.01128247  |
| Extracellular matrix organization                                                   | 0.015445513 |
| Degradation of the extracellular matrix                                             | 0.015445513 |
| Syndecan interactions                                                               | 0.016161666 |
| Dopaminergic synapse                                                                | 0.017811067 |
| ECM-receptor interaction                                                            | 0.020378073 |
| DCC mediated attractive signaling                                                   | 0.020927102 |
| EPHB-mediated forward signaling                                                     | 0.020927102 |
| Nephrin interactions                                                                | 0.020927102 |
| Netrin-1 signaling                                                                  | 0.020927102 |
| EPH-Ephrin signaling                                                                | 0.020927102 |
| eNOS activation and regulation                                                      | 0.020927102 |
| NOSTRIN mediated eNOS trafficking                                                   | 0.020927102 |
| Metabolism of nitric oxide                                                          | 0.020927102 |
| Adipocytokine signaling pathway                                                     | 0.021149708 |

|                                                                                                |             |
|------------------------------------------------------------------------------------------------|-------------|
| Tight junction                                                                                 | 0.026440954 |
| Fatty acid, triacylglycerol, and ketone body metabolism                                        | 0.027235529 |
| Regulation of lipid metabolism by Peroxisome proliferator-activated receptor alpha (PPARalpha) | 0.027235529 |
| Transcriptional regulation of white adipocyte differentiation                                  | 0.027235529 |
| PPARA activates gene expression                                                                | 0.027235529 |
| TGF-beta signaling pathway                                                                     | 0.028180307 |
| Longevity regulating pathway                                                                   | 0.028553227 |
| VEGF signaling pathway                                                                         | 0.036574608 |
| PECAM1 interactions                                                                            | 0.038788655 |
| Signal transduction by L1                                                                      | 0.0395926   |
| SEMA3A-Plexin repulsion signaling by inhibiting Integrin adhesion                              | 0.0395926   |
| Sema3A PAK dependent Axon repulsion                                                            | 0.0395926   |
| Neurophilin interactions with VEGF and VEGFR                                                   | 0.0395926   |
| RHO GTPases Activate WASPs and WAVES                                                           | 0.045168574 |
| Regulation of actin dynamics for phagocytic cup formation                                      | 0.045168574 |
| Fcgamma receptor (FCGR) dependent phagocytosis                                                 | 0.045168574 |
| RHO GTPase Effectors                                                                           | 0.045168574 |
| Gene Expression                                                                                | 0.045425788 |
| Generic Transcription Pathway                                                                  | 0.045425788 |
