# Supplementary material for: A systematic integrative approach reveals novel microRNAs in diabetic nephropathy
Source: PubMed Central journal article supplement — J Res Med Sci. 2020 Jan 20;25:1. doi: 10.4103/jrms.JRMS_289_19 (PMC7003547; doi:10.4103/jrms.jrms_289_19), 2020-01-20
Supplement: JRMS-25-1_Suppl5.pdf [file JRMS-25-1_Suppl5.pdf]

Transcription Factors (TF)

| TF     | Degree | BetweennessCentrality | AverageShortestPath Length | Closeness Centrality | Clustering Coefficient | Eccentricity | NeighborhoodConnectivity | Radiality  | Stress  | Topological Coefficient |
|--------|--------|-----------------------|----------------------------|----------------------|------------------------|--------------|--------------------------|------------|---------|-------------------------|
| MITF   | 302    | 0.05487946            | 1.79840319                 | 0.55604883           | 0.03654485             | 4            | 41.03311258              | 0.84031936 | 1600562 | 0.04668987              |
| SMAD2  | 215    | 0.02419495            | 1.82734531                 | 0.54274194           | 0.08185177             | 3            | 61.9255814               | 0.83453094 | 893996  | 0.06643077              |
| RUNX2  | 155    | 0.02223497            | 1.90419162                 | 0.52515723           | 0.05719422             | 3            | 52.95483771              | 0.81961688 | 524712  | 0.05974235              |
| SMAD4  | 177    | 0.02031782            | 1.88622754                 | 0.53015873           | 0.06901644             | 3            | 58.2259887               | 0.82275449 | 669386  | 0.0621288               |
| RELA   | 131    | 0.01964799            | 1.97205589                 | 0.50708502           | 0.04388761             | 3            | 42.14503817              | 0.80558882 | 415758  | 0.04759105              |
| TCF21  | 148    | 0.01820392            | 1.94311377                 | 0.5146379            | 0.04734326             | 4            | 46.59459459              | 0.81137725 | 442986  | 0.05178174              |
| JUN    | 147    | 0.01804909            | 1.94011976                 | 0.5154321            | 0.04185168             | 3            | 40.70547945              | 0.81497605 | 460302  | 0.04602172              |
| NFYA   | 144    | 0.01644952            | 1.93013972                 | 0.51809721           | 0.05740093             | 3            | 51.85883333              | 0.81397206 | 448764  | 0.0518725               |
| STAT3  | 156    | 0.01556809            | 1.93912176                 | 0.51569738           | 0.05492142             | 3            | 48.19230769              | 0.81217565 | 426822  | 0.05356543              |
| BACH1  | 134    | 0.01436179            | 2.01197605                 | 0.49702381           | 0.05667153             | 3            | 47.59701493              | 0.79760479 | 377818  | 0.05640444              |
| TP53   | 136    | 0.01433644            | 1.97704591                 | 0.50580515           | 0.0506359              | 4            | 43.90041176              | 0.80459082 | 412454  | 0.04971155              |
| NR3C1  | 150    | 0.01412332            | 1.91117764                 | 0.5232376            | 0.08539553             | 3            | 66.42                    | 0.81784447 | 530996  | 0.07065248              |
| MYB    | 131    | 0.01351702            | 2.06187625                 | 0.48499516           | 0.02886106             | 4            | 37.15384602              | 0.78762475 | 403938  | 0.04733124              |
| GATA4  | 126    | 0.01235973            | 2.05688623                 | 0.48617176           | 0.03771429             | 4            | 41.46031746              | 0.78862275 | 409438  | 0.05179444              |
| FOXO2  | 167    | 0.01212325            | 2.22754491                 | 0.44892473           | 0.00670947             | 4            | 33.1497006               | 0.75449102 | 642648  | 0.06339849              |
| RUNX1  | 114    | 0.01155435            | 1.97704591                 | 0.50580515           | 0.07509938             | 3            | 61.6230702               | 0.80459082 | 333032  | 0.0681646               |
| CTNNA1 | 124    | 0.01099003            | 2.01497006                 | 0.49628529           | 0.05218988             | 3            | 47.14516129              | 0.79700598 | 352612  | 0.05506508              |
| ATF3   | 120    | 0.01095275            | 2.02295409                 | 0.49432659           | 0.03921569             | 4            | 40.89166667              | 0.79540918 | 290234  | 0.04829186              |
| GATA3  | 107    | 0.01078479            | 2.24051896                 | 0.44632517           | 0.02045495             | 4            | 33.80373832              | 0.75189621 | 552920  | 0.0548758               |
| ZNF217 | 155    | 0.01036735            | 2.00998004                 | 0.49751738           | 0.05018852             | 4            | 48.70967742              | 0.79800399 | 390456  | 0.05906793              |
| BRD4   | 113    | 0.00913819            | 2.11477046                 | 0.47286456           | 0.02528445             | 3            | 36.98230088              | 0.77704591 | 267338  | 0.04924197              |
| SMAD3  | 123    | 0.00913736            | 1.93512974                 | 0.51676122           | 0.09316273             | 4            | 61.96747967              | 0.81297405 | 286508  | 0.06569588              |
| EP300  | 103    | 0.0086453             | 1.97704591                 | 0.50580515           | 0.07938321             | 3            | 57.2542718               | 0.80459082 | 251872  | 0.06226692              |
| AR     | 121    | 0.00856269            | 2.19660679                 | 0.45524761           | 0.0231405              | 4            | 36.79338843              | 0.76067864 | 346894  | 0.05638229              |
| FOXO3  | 119    | 0.00850948            | 1.95908184                 | 0.5104442            | 0.08916109             | 3            | 67.94117647              | 0.80818363 | 370540  | 0.07374355              |
| ELL1   | 118    | 0.00788529            | 2.02794411                 | 0.49511024           | 0.04809503             | 4            | 46.21186441              | 0.79441118 | 255886  | 0.05466295              |
| SOX2   | 110    | 0.00743688            | 2.09680639                 | 0.47691575           | 0.03686405             | 3            | 40.11818182              | 0.78063872 | 213284  | 0.05191761              |
| JUND   | 113    | 0.00712029            | 2.26746507                 | 0.44102113           | 0.01153603             | 4            | 31.65486726              | 0.74650699 | 303394  | 0.05505175              |
| FOXM1  | 117    | 0.00644811            | 2.13972056                 | 0.46735075           | 0.02409949             | 4            | 39.25641026              | 0.77205589 | 224008  | 0.05415081              |
| PA3    | 107    | 0.0057458             | 2.06397126                 | 0.48452111           | 0.05814387             | 3            | 50.34579439              | 0.7822555  | 192676  | 0.06159051              |
| NANOG  | 103    | 0.0055109             | 2.19860279                 | 0.45484332           | 0.02417666             | 4            | 37.31047961              | 0.76027944 | 178794  | 0.05529392              |
| TOP2B  | 108    | 0.00551544            | 2.36027944                 | 0.42367865           | 0.00899312             | 4            | 34.1682243               | 0.72794411 | 349122  | 0.07088213              |
| TCF3   | 86     | 0.00551093            | 2.05688623                 | 0.48617176           | 0.05608755             | 4            | 52.7906977               | 0.78862275 | 150870  | 0.06191075              |
| CDX2   | 97     | 0.00540327            | 2.34313137                 | 0.42674617           | 0.01159794             | 4            | 33.38144413              | 0.71313733 | 294962  | 0.06448669              |
| ARNT   | 87     | 0.00492988            | 2.09481038                 | 0.47737018           | 0.08504001             | 3            | 57.59770315              | 0.78033992 | 152380  | 0.07031383              |
| TCF4   | 76     | 0.00325122            | 2.02195609                 | 0.49457058           | 0.08350877             | 3            | 76.69736842              | 0.79560878 | 186952  | 0.08492161              |
| CLOCK  | 68     | 0.00315624            | 2.08782435                 | 0.4789675            | 0.05297779             | 4            | 65.39705882              | 0.78243513 | 127328  | 0.07756392              |
| PRDM14 | 87     | 0.00306761            | 2.4760479                  | 0.40386941           | 0.0064154              | 4            | 35.72413793              | 0.70479042 | 163890  | 0.09352142              |
| NR     | 75     | 0.00284429            | 2.07884232                 | 0.48103697           | 0.1009009              | 3            | 64.93333333              | 0.78423154 | 120052  | 0.07657233              |
| GATA2  | 69     | 0.00285812            | 2.12075848                 | 0.47152941           | 0.07502131             | 4            | 54.88405797              | 0.7758483  | 91682   | 0.06790233              |
| TFAP2C | 66     | 0.0027828             | 2.31936128                 | 0.43115318           | 0.02657343             | 4            | 40.33333333              | 0.73612774 | 98688   | 0.06829877              |
| NFE2L2 | 51     | 0.00241353            | 2.27944112                 | 0.43870403           | 0.04627451             | 4            | 44.76470588              | 0.74411178 | 85694   | 0.06758448              |
| STAT6  | 56     | 0.00237123            | 2.15968064                 | 0.46303142           | 0.05519481             | 4            | 50.13928971              | 0.76806387 | 66840   | 0.06443701              |
| FOXJ1  | 55     | 0.0020902             | 2.18662675                 | 0.45732542           | 0.06065006             | 4            | 51.36363636              | 0.76267465 | 59970   | 0.06828499              |
| TP63   | 60     | 0.00188787            | 2.06886228                 | 0.48335745           | 0.07118644             | 4            | 88.61666667              | 0.78622754 | 178688  | 0.10187956              |
| PIAS1  | 60     | 0.0017804             | 2.39221557                 | 0.41802253           | 0.01186441             | 4            | 37.2155689               | 0.72155689 | 108992  | 0.0718099               |
| ESR2   | 45     | 0.00135698            | 2.29141717                 | 0.43641135           | 0.06767677             | 4            | 49.51111111              | 0.7471657  | 39180   | 0.07470163              |
| GATA1  | 54     | 0.00117611            | 2.53892116                 | 0.39386792           | 0.00628931             | 4            | 32.72222222              | 0.69212557 | 58684   | 0.08722931              |
| WT1    | 43     | 8.99E-04              | 2.07984032                 | 0.48080614           | 0.12439024             | 3            | 83.75609756              | 0.78403194 | 52366   | 0.09514667              |
| POU5F1 | 39     | 7.98E-04              | 2.43013972                 | 0.41149897           | 0.02699055             | 4            | 42.41025641              | 0.71397206 | 33910   | 0.08145382              |
| NR1H3  | 37     | 7.52E-04              | 2.69461078                 | 0.37111111           | 0                      | 4            | 21.64864865              | 0.66107784 | 27104   | 0.08749427              |
| TRIM28 | 17     | 2.56E-04              | 2.56187625                 | 0.39033892           | 0.06617647             | 4            | 44.76470588              | 0.68762475 | 6446    | 0.10077984              |
| KRT7   | 14     | 5.19E-05              | 2.39121756                 | 0.41818999           | 0.089011               | 4            | 109.7142857              | 0.72175649 | 10122   | 0.1826358               |
| DMRT1  | 7      | 1.42E-05              | 2.63473054                 | 0.37954545           | 0.04761905             | 4            | 93.85714286              | 0.67305389 | 2178    | 0.25038402              |
| PPARA  | 3      | 4.70E-07              | 2.81836327                 | 0.35481586           | 0.66666667             | 4            | 81.33333333              | 0.63632735 | 20      | 0.42582897              |
| EWSR1  | 1      | 0                     | 2.9760479                  | 0.3360161            | 0                      | 4            | 103                      | 0.60479042 | 0       | 0                       |
| TBL1X  | 1      | 0                     | 3.01937206                 | 0.33178808           | 0                      | 4            | 124                      | 0.59720559 | 0       | 0                       |





|                  |    |            |            |            |            |   |             |            |       |            |
|------------------|----|------------|------------|------------|------------|---|-------------|------------|-------|------------|
| hsa-miR-3676     | 46 | 0.00103855 | 2.43812375 | 0.41015145 | 0.01932367 | 3 | 44          | 0.71237525 | 55464 | 0.08900991 |
| hsa-miR-1247     | 46 | 0.00095962 | 2.40319361 | 0.41611296 | 0.02995169 | 4 | 47.73913043 | 0.71936128 | 54844 | 0.08821148 |
| hsa-miR-553      | 38 | 0.00083936 | 2.43413174 | 0.41024111 | 0.05110991 | 4 | 50.76315789 | 0.71317365 | 50080 | 0.09278714 |
| hsa-miR-3605-3p  | 46 | 0.00083322 | 2.43113772 | 0.41133005 | 0.02318841 | 4 | 49.7826087  | 0.71377246 | 52374 | 0.09371847 |
| hsa-miR-1468     | 42 | 0.00079404 | 2.29241517 | 0.43622116 | 0.04413473 | 4 | 56.42857143 | 0.74151697 | 64952 | 0.08583096 |
| hsa-miR-933      | 36 | 0.00078678 | 2.41117764 | 0.41473151 | 0.02539683 | 4 | 48.75       | 0.71776647 | 51638 | 0.08968401 |
| hsa-miR-4315     | 47 | 0.00073139 | 2.37225549 | 0.42153976 | 0.04162812 | 4 | 53.27659574 | 0.7255489  | 62090 | 0.09348921 |
| hsa-miR-4520a-5p | 42 | 0.00067412 | 2.51596806 | 0.39746132 | 0.0116144  | 4 | 46.23809524 | 0.69680639 | 63224 | 0.10969593 |
| hsa-miR-4520b-5p | 42 | 0.00067412 | 2.51596806 | 0.39746132 | 0.0116144  | 4 | 46.23809524 | 0.69680639 | 63224 | 0.10969593 |
| hsa-miR-887      | 36 | 0.00062805 | 2.57984032 | 0.38762089 | 0.0047619  | 4 | 36.77777778 | 0.68403194 | 34104 | 0.10109546 |
| hsa-miR-521      | 32 | 0.00058232 | 2.55189621 | 0.39186547 | 0.01209677 | 4 | 38.90625    | 0.68962076 | 34014 | 0.09676396 |
| hsa-miR-1249     | 31 | 0.00057895 | 2.47005988 | 0.40484848 | 0.04731183 | 4 | 54.48387097 | 0.70598802 | 40210 | 0.11024243 |
| hsa-miR-517b     | 32 | 0.00055918 | 2.34131737 | 0.42710997 | 0.04637097 | 4 | 56.53125    | 0.73173653 | 32084 | 0.09086772 |
| hsa-miR-4671-5p  | 35 | 0.0005196  | 2.5508982  | 0.39201878 | 0.01512605 | 4 | 43.94285714 | 0.68982036 | 44484 | 0.10982222 |
| hsa-miR-1973     | 37 | 0.00047883 | 2.49401198 | 0.40096038 | 0.01801802 | 3 | 46.54054054 | 0.7011976  | 35022 | 0.10289662 |
| hsa-miR-1537     | 33 | 0.00047709 | 2.3742515  | 0.42118537 | 0.05681818 | 4 | 51.3030303  | 0.7251497  | 23070 | 0.08712769 |
| hsa-miR-191      | 35 | 0.00045717 | 2.68263473 | 0.37276786 | 0          | 4 | 38.34285714 | 0.66347395 | 32440 | 0.14997131 |
| hsa-miR-598      | 40 | 0.00045038 | 2.55988024 | 0.39064327 | 0.01666667 | 4 | 45.275      | 0.68802395 | 41124 | 0.11861702 |
| hsa-miR-4783-5p  | 20 | 0.00044789 | 2.4251497  | 0.41234568 | 0.06315789 | 4 | 55.25       | 0.71497006 | 13150 | 0.09954628 |
| hsa-miR-4790-5p  | 37 | 0.0004464  | 2.34630739 | 0.42620162 | 0.07057057 | 4 | 59.83783784 | 0.73073852 | 36486 | 0.09273567 |
| hsa-miR-423-3p   | 37 | 0.00042965 | 2.54091816 | 0.39355852 | 0.01651652 | 4 | 44.83783784 | 0.69181637 | 37886 | 0.11061437 |
| hsa-miR-639      | 33 | 0.00039554 | 2.44411178 | 0.40914659 | 0.02651515 | 4 | 49.27272727 | 0.71117664 | 29298 | 0.09623807 |
| hsa-miR-4665-3p  | 28 | 0.00038268 | 2.56686627 | 0.38958009 | 0.01587302 | 4 | 42.42857143 | 0.68662675 | 27476 | 0.10797557 |
| hsa-miR-3186-5p  | 30 | 0.00035925 | 2.46506986 | 0.40566802 | 0.01609195 | 4 | 51.86666667 | 0.70688603 | 26510 | 0.10506502 |
| hsa-miR-95       | 28 | 0.00034549 | 2.47904192 | 0.40338164 | 0.03968254 | 4 | 56.71428571 | 0.70419162 | 20566 | 0.11653357 |
| hsa-miR-3912     | 27 | 0.00028143 | 2.60978044 | 0.383174   | 0.00598901 | 4 | 40.7037037  | 0.67802491 | 19166 | 0.11675890 |
| hsa-miR-1306     | 28 | 0.00028091 | 2.71457086 | 0.3683235  | 0          | 4 | 38.5        | 0.65708583 | 26924 | 0.16054421 |
| hsa-miR-3610     | 20 | 0.00027703 | 2.42814371 | 0.41183724 | 0.06842105 | 4 | 65.3        | 0.71437126 | 20002 | 0.1185219  |
| hsa-miR-516a-5p  | 30 | 0.00020952 | 2.55189621 | 0.39186547 | 0.02298851 | 4 | 49          | 0.68962076 | 18938 | 0.12031509 |
| hsa-miR-369-5p   | 20 | 0.00018865 | 2.57085828 | 0.38897516 | 0.01578947 | 4 | 50.25       | 0.6852834  | 13408 | 0.12512626 |
| hsa-miR-100      | 21 | 0.00011824 | 2.68363273 | 0.37262923 | 0.0047619  | 4 | 39.57142857 | 0.66327345 | 16364 | 0.1385902  |
| hsa-miR-99a      | 21 | 0.00011824 | 2.68363273 | 0.37262923 | 0.0047619  | 4 | 39.57142857 | 0.66327345 | 16364 | 0.1385902  |
| hsa-miR-99b      | 21 | 0.00011824 | 2.68363273 | 0.37262923 | 0.0047619  | 4 | 39.57142857 | 0.66327345 | 16364 | 0.1385902  |
| hsa-miR-487b     | 20 | 0.0001073  | 2.61776447 | 0.38200534 | 0.00526316 | 4 | 55.05       | 0.67644711 | 13322 | 0.15515759 |
| hsa-miR-126      | 12 | 0.00005028 | 2.64570858 | 0.37797058 | 0.01515152 | 4 | 54.33333333 | 0.67085828 | 5566  | 0.16017964 |
