# Supplementary material for: A systematic integrative approach reveals novel microRNAs in diabetic nephropathy
Source: PubMed Central journal article supplement — J Res Med Sci. 2020 Jan 20;25:1. doi: 10.4103/jrms.JRMS_289_19 (PMC7003547; doi:10.4103/jrms.jrms_289_19), 2020-01-20
Supplement: JRMS-25-1_Suppl6.pdf [file JRMS-25-1_Suppl6.pdf]

Supplementary Table 7: Topology analysis of the multi-layer Tubulointerstitium network.

| Differential Expressed Genes (DEG) |        |                       |                           |                      |                        |              |                          |            |         |                        |
|------------------------------------|--------|-----------------------|---------------------------|----------------------|------------------------|--------------|--------------------------|------------|---------|------------------------|
| DEG                                | Degree | BetweennessCentrality | AverageShortestPathLength | Closeness Centrality | Clustering Coefficient | Eccentricity | NeighborhoodConnectivity | Radiality  | Stress  | TopologicalCoefficient |
| RUNX1                              | 542    | 0.04060004            | 1.65779221                | 0.60321191           | 0.05064165             | 3            | 65.58395522              | 0.86844156 | 2881052 | 0.04283733             |
| FLI1                               | 447    | 0.02956501            | 1.73111688                | 0.57699513           | 0.03477932             | 3            | 53.9548533               | 0.85137662 | 2076254 | 0.03585058             |
| SNADG1                             | 327    | 0.01460652            | 1.80974026                | 0.59265848           | 0.02560264             | 3            | 78.91104294              | 0.83805195 | 1185492 | 0.05248551             |
| BACH1                              | 187    | 0.00752724            | 1.9025974                 | 0.52559727           | 0.07963889             | 3            | 86.6575401               | 0.559950   | 559950  | 0.01848615             |
| NR3C1                              | 205    | 0.00713196            | 1.88116883                | 0.5315844            | 0.10363184             | 3            | 116.9850746              | 0.82376623 | 839006  | 0.07686273             |
| CTNNB1                             | 175    | 0.00490263            | 1.91818182                | 0.51232101           | 0.08579882             | 3            | 83.73372781              | 0.81636364 | 390166  | 0.05596779             |
| TTF2                               | 151    | 0.00448252            | 1.97077922                | 0.50743151           | 0.06216336             | 3            | 72.5099377               | 0.80584416 | 298310  | 0.05068772             |
| ZNF217                             | 214    | 0.00415455            | 1.80766234                | 0.52975376           | 0.09345794             | 3            | 86.28971963              | 0.82462553 | 417578  | 0.05756496             |
| MAPK1                              | 122    | 0.00303409            | 1.93506494                | 0.51677852           | 0.10377598             | 3            | 163.7704918              | 0.77103896 | 728666  | 0.10801722             |
| MVC                                | 124    | 0.00281885            | 1.95779221                | 0.51077944           | 0.10555778             | 3            | 95.17073171              | 0.80844156 | 223158  | 0.06425564             |
| IRF1                               | 72     | 0.00246514            | 2.00519481                | 0.49870466           | 0.11750503             | 4            | 135.6478873              | 0.79896104 | 173058  | 0.08293826             |
| HSP90AB1                           | 54     | 0.00189492            | 2.03506494                | 0.49138481           | 0.13417191             | 3            | 131.537037               | 0.79298701 | 96108   | 0.09200943             |
| NAAL5                              | 38     | 0.00137556            | 2.12402597                | 0.47080404           | 0.01280228             | 4            | 181.4788482              | 0.77519481 | 328282  | 0.14030465             |
| FARS2                              | 14     | 0.00131248            | 2.14480519                | 0.46624281           | 0.05835516             | 4            | 285.7142857              | 0.77103896 | 64842   | 0.21944658             |
| QKI                                | 117    | 0.00126189            | 1.95454545                | 0.51162791           | 0.05909225             | 3            | 171.7435897              | 0.80909091 | 787518  | 0.11546221             |
| NFE2L2                             | 93     | 0.00120002            | 1.98051948                | 0.50491803           | 0.13330148             | 3            | 120.6630435              | 0.8018961  | 127138  | 0.08163941             |
| CLU2                               | 59     | 0.00107361            | 2.01233766                | 0.49693449           | 0.06954997             | 3            | 190.2372881              | 0.79753247 | 235222  | 0.13066673             |
| AHR                                | 103    | 0.00104892            | 1.97077922                | 0.50743151           | 0.14376238             | 3            | 123.2727277              | 0.80584416 | 155882  | 0.08307091             |
| YWHAZ                              | 80     | 9.67E-04              | 1.97402597                | 0.50657895           | 0.13575949             | 3            | 168.6125                 | 0.80519481 | 208172  | 0.11247498             |
| ENAH                               | 111    | 9.48E-04              | 1.96428571                | 0.50909091           | 0.05896806             | 3            | 177.4594595              | 0.80714286 | 665024  | 0.12003072             |
| NRP1                               | 60     | 9.44E-04              | 2.00194805                | 0.49951346           | 0.10960452             | 3            | 206.2666667              | 0.79961039 | 204892  | 0.13990276             |
| TMEM135                            | 96     | 8.22E-04              | 1.98896104                | 0.50277506           | 0.03640351             | 3            | 182.5104167              | 0.80220779 | 617466  | 0.12579023             |
| SEMA6A                             | 8      | 8.08E-04              | 2.02272727                | 0.49438026           | 0.04280361             | 4            | 130.8165265              | 0.79545455 | 338486  | 0.13848697             |
| IRF8                               | 48     | 7.70E-04              | 2.05584416                | 0.48641819           | 0.13475177             | 3            | 135.5208333              | 0.79883117 | 88926   | 0.09637269             |
| SSH1                               | 82     | 7.40E-04              | 1.98701299                | 0.50326797           | 0.05721168             | 3            | 185.036584               | 0.8025974  | 462778  | 0.12619662             |
| TBL1XR1                            | 79     | 7.39E-04              | 1.98051948                | 0.50491803           | 0.12087912             | 3            | 196.0769231              | 0.8018961  | 300292  | 0.13157804             |
| MIET                               | 55     | 7.21E-04              | 2.00974026                | 0.49756764           | 0.14478114             | 3            | 204.1545466              | 0.79805195 | 129262  | 0.13895662             |
| STAT1                              | 76     | 7.07E-04              | 1.97414102                | 0.49714102           | 0.14675135             | 3            | 147.789515               | 0.79714286 | 117329  | 0.13522286             |
| FOXK3                              | 83     | 6.92E-04              | 1.98051948                | 0.50491803           | 0.0649427              | 3            | 200.3373494              | 0.8038961  | 474454  | 0.13522286             |
| EFNB2                              | 72     | 6.88E-04              | 2.00324675                | 0.49918963           | 0.06416275             | 3            | 182.875                  | 0.79935065 | 297750  | 0.12545756             |
| SNX1                               | 74     | 6.86E-04              | 2.01298701                | 0.49677419           | 0.03989519             | 3            | 162.8378378              | 0.7974026  | 349804  | 0.13886176             |
| TRAF3                              | 71     | 6.83E-04              | 2.02272727                | 0.49438026           | 0.04386318             | 4            | 145.3802817              | 0.79545455 | 355996  | 0.10241832             |
| PRKCB                              | 86     | 6.63E-04              | 1.98246734                | 0.50442188           | 0.04409647             | 3            | 173.4609767              | 0.80350649 | 378654  | 0.13848697             |
| ATM                                | 72     | 6.30E-04              | 1.99155844                | 0.50211933           | 0.10093897             | 3            | 176.013889               | 0.80168831 | 217210  | 0.11891892             |
| NEDD4                              | 55     | 6.29E-04              | 2.02207792                | 0.49454078           | 0.07609428             | 3            | 186.4727273              | 0.79558442 | 167580  | 0.12889476             |
| SSR1                               | 63     | 6.27E-04              | 1.98896104                | 0.50277506           | 0.0514259              | 3            | 174.4731183              | 0.80220779 | 466758  | 0.11984628             |
| SPRED2                             | 73     | 6.16E-04              | 1.99480519                | 0.50130208           | 0.0848554              | 3            | 199.1369863              | 0.80103896 | 355998  | 0.13558683             |
| DRP2                               | 49     | 6.08E-04              | 2.02807013                | 0.49264125           | 0.04489796             | 3            | 190.4489796              | 0.79454545 | 419944  | 0.13990473             |
| PRP2                               | 87     | 6.05E-04              | 1.98636364                | 0.50343249           | 0.03742315             | 3            | 186.4367816              | 0.80272727 | 472584  | 0.12726802             |
| RBBP4                              | 93     | 5.88E-04              | 1.98376623                | 0.50409165           | 0.07246377             | 4            | 173.688172               | 0.80324675 | 384090  | 0.11820637             |
| PPP3CA                             | 61     | 5.74E-04              | 2.00649351                | 0.49838188           | 0.09071038             | 3            | 203.6229508              | 0.79870103 | 256632  | 0.13911455             |
| ETV1                               | 77     | 5.59E-04              | 2                         | 0.5                  | 0.0645931              | 3            | 189.5584416              | 0.8        | 414322  | 0.12799681             |
| GUCY1A3                            | 83     | 5.44E-04              | 2.02727273                | 0.49327354           | 0.08313458             | 3            | 181.3641458              | 0.79454545 | 419904  | 0.13099096             |
| SCRN1                              | 77     | 5.40E-04              | 1.98831169                | 0.50293926           | 0.05741627             | 4            | 180.0500961              | 0.80233766 | 435778  | 0.12240481             |
| RB1                                | 60     | 5.38E-04              | 2.01558442                | 0.49613402           | 0.14202221             | 4            | 154.5932203              | 0.79688312 | 98828   | 0.10603102             |
| POLIM5                             | 61     | 5.18E-04              | 2.01168831                | 0.4970949            | 0.06284153             | 3            | 185.4262295              | 0.79766234 | 240432  | 0.12737311             |
| NFIB                               | 80     | 5.18E-04              | 1.98506494                | 0.50376186           | 0.0835443              | 3            | 202.4                    | 0.80298701 | 397914  | 0.13689953             |
| IRFPP1                             | 51     | 5.09E-04              | 2.01428571                | 0.49645139           | 0.04545139             | 3            | 200.4372788              | 0.79714286 | 417329  | 0.13717529             |
| TRIM33                             | 87     | 5.09E-04              | 1.98051948                | 0.50491803           | 0.06789628             | 4            | 195.6436782              | 0.8038961  | 441608  | 0.13256965             |
| ILET5                              | 88     | 5.08E-04              | 1.98441558                | 0.5039267            | 0.06400209             | 4            | 189.204545               | 0.80311688 | 412668  | 0.12841758             |
| THBS1                              | 41     | 5.04E-04              | 2.03896104                | 0.49044586           | 0.12804878             | 3            | 212.5609756              | 0.79220779 | 101038  | 0.14797201             |
| ARHDS8                             | 84     | 5.00E-04              | 1.98766234                | 0.50130356           | 0.06913368             | 4            | 192.7619048              | 0.80246753 | 399766  | 0.13100094             |
| NR1D2                              | 62     | 4.93E-04              | 2.03896104                | 0.49044586           | 0.04041122             | 4            | 177.6208897              | 0.79220779 | 402668  | 0.13609842             |
| RAB11FIP1                          | 65     | 4.88E-04              | 2.02772727                | 0.49327354           | 0.04038466             | 4            | 176.3230769              | 0.79454545 | 284544  | 0.1240195              |
| SYK                                | 67     | 4.86E-04              | 2.01298701                | 0.49677419           | 0.13898981             | 3            | 174.2537313              | 0.7974026  | 157164  | 0.12007159             |
| STK3BL                             | 62     | 4.85E-04              | 2.02662138                | 0.49143159           | 0.0460074              | 4            | 201.8387097              | 0.79467532 | 245944  | 0.14123069             |
| CXCL12                             | 75     | 4.85E-04              | 2.00324675                | 0.49918963           | 0.0600099              | 3            | 168.6                    | 0.79935065 | 373176  | 0.11618391             |
| TMED10                             | 64     | 4.76E-04              | 2.00714286                | 0.49823054           | 0.10015941             | 3            | 195.892625               | 0.79857143 | 146625  | 0.13959135             |
| SETX                               | 51     | 4.68E-04              | 2.03636364                | 0.49107143           | 0.05803922             | 3            | 193.2352941              | 0.79272727 | 186846  | 0.13573812             |
| ASPH                               | 98     | 4.67E-04              | 1.97792208                | 0.50558109           | 0.04923206             | 3            | 196.5                    | 0.80441558 | 547868  | 0.13371584             |
| ZEB2                               | 77     | 4.63E-04              | 1.9974026                 | 0.5006502            | 0.0683527              | 4            | 182.5714286              | 0.80051948 | 343896  | 0.12467178             |
| TSR1                               | 26     | 4.57E-04              | 2.1487013                 | 0.4653974            | 0.08923077             | 4            | 145.3076923              | 0.77025974 | 27752   | 0.11322453             |
| MDI2                               | 64     | 4.54E-04              | 2.01233766                | 0.49693449           | 0.04693449             | 3            | 192.1282057              | 0.79733247 | 402668  | 0.13609842             |
| ATP9A                              | 71     | 4.53E-04              | 2.00844156                | 0.49789948           | 0.06076459             | 3            | 166.719181               | 0.7983117  | 340044  | 0.12222524             |
| USP46                              | 75     | 4.43E-04              | 2.02142857                | 0.49469965           | 0.04612613             | 3            | 172.5333333              | 0.79571429 | 313476  | 0.12146582             |
| PPP1CB                             | 71     | 4.43E-04              | 2.00584416                | 0.49854322           | 0.06197183             | 4            | 183.6056338              | 0.79883117 | 259304  | 0.12628559             |
| COND2                              | 74     | 4.34E-04              | 2.0038961                 | 0.49902787           | 0.07404665             | 4            | 184.7297297              | 0.79922078 | 300644  | 0.12667297             |
| CELF2                              | 77     | 4.34E-04              | 2.00974026                | 0.49757674           | 0.07153138             | 3            | 171.653138               | 0.79805195 | 419904  | 0.13099096             |
| PTPN11                             | 62     | 4.33E-04              | 2.00649351                | 0.49838188           | 0.08196721             | 3            | 178.1290323              | 0.79870103 | 290608  | 0.12177399             |
| PPM1H                              | 68     | 4.31E-04              | 2.0012987                 | 0.49967554           | 0.08296752             | 4            | 206.176471               | 0.79974026 | 310808  | 0.14054851             |
| PHACTR2                            | 86     | 4.27E-04              | 2.00194805                | 0.49951346           | 0.02927497             | 3            | 188.8139535              | 0.79961039 | 482434  | 0.13186697             |
| ATP2A2                             | 81     | 4.24E-04              | 1.99025974                | 0.50244608           | 0.06214568             | 3            | 185.1973309              | 0.80194805 | 368110  | 0.12587389             |
| ATG16L1                            | 92     | 4.21E-04              | 2.0012987                 | 0.49697954           | 0.08010896             | 3            | 197.6208897              | 0.7974026  | 480520  | 0.13609842             |
| CD44                               | 67     | 4.21E-04              | 1.9987013                 | 0.50032486           | 0.07149791             | 3            | 205.1641791              | 0.80025974 | 260456  | 0.13917786             |
| LPGAT1                             | 88     | 4.21E-04              | 1.99025974                | 0.50244608           | 0.04676071             | 3            | 189.25                   | 0.80194805 | 457414  | 0.1295688              |
| C3                                 | 14     | 4.17E-04              | 2.24415584                | 0.44560185           | 0.16483516             | 4            | 200.0714286              | 0.75116883 | 18758   | 0.17376195             |
| KPNAB1                             | 73     | 4.14E-04              | 2.02077922                | 0.49485861           | 0.05745834             | 4            | 174.246573               | 0.79584416 | 268136  | 0.127188892            |
| SNAC1                              | 67     | 4.12E-04              | 2.06948952                | 0.48321305           | 0.02537134             | 4            | 186.1039                 | 0.7861039  | 280952  | 0.15672495             |
| ARHGAP29                           | 80     | 4.11E-04              | 2.00779221                | 0.49805951           | 0.03512658             | 4            | 185.2125                 | 0.79844156 | 405936  | 0.129910851            |
| PGM3                               | 71     | 4.08E-04              | 2.06428571                | 0.48442907           | 0.01408451             | 4            | 182.9014085              | 0.78714286 | 318108  | 0.13680885             |
| SPTLC2                             | 76     | 4.08E-04              | 2.02727273                | 0.49327354           | 0.0589649              | 3            | 175.75                   | 0.79454545 | 361602  | 0.13818174             |
| ZNF652                             | 87     | 4.07E-04              | 2.01038961                | 0.49741062           | 0.02813467             | 4            | 190.5632184              | 0.79792208 | 467512  | 0.13405135             |
| FBNP1                              | 56     | 4.03E-04              | 2.01883117                | 0.49538312           | 0.08981029             | 3            | 192.731429               | 0.79623766 | 419904  | 0.13099096             |
| BCLAF1                             | 67     | 4.02E-04              | 2.01688312                | 0.49584155           | 0.08641791             | 3            | 188.641791               | 0.79662338 | 335316  | 0.1317399              |
| ZNF264                             | 75     | 3.99E-04              | 2.10584416                | 0.47486895           | 7.21E-04               | 4            | 162.24                   | 0.77883117 | 419316  | 0.13090909             |
| ABHD2                              | 92     | 3.98E-04              | 1.98116883                | 0.50475254           | 0.08576206             | 3            | 194.4021739              | 0.80176623 | 387692  | 0.13161962             |
| RBMB8A                             | 75     | 3.94E-04              | 2.01103896                | 0.49725541           | 0.04648649             | 3            | 172.8666667              | 0.79779221 | 352058  | 0                      |

|          |    |          |            |             |             |   |             |             |         |             |
|----------|----|----------|------------|-------------|-------------|---|-------------|-------------|---------|-------------|
| RP56KA2  | 46 | 3.24E-04 | 2.04350649 | 0.48935494  | 0.0927362   | 3 | 151.5652174 | 0.7912987   | 125274  | 0.10650951  |
| TRB2     | 39 | 3.22E-04 | 2.06883117 | 0.48336472  | 0.04723347  | 4 | 184.1798872 | 0.78623377  | 139002  | 0.1331611   |
| RCYH1    | 52 | 3.21E-04 | 2.03051948 | 0.45248481  | 0.06412056  | 4 | 199.9807692 | 0.7939961   | 140762  | 0.13901519  |
| HP5A5    | 55 | 3.19E-04 | 2.02142857 | 0.49454078  | 0.1146      | 3 | 156.1368013 | 0.79558442  | 82896   | 0.13415767  |
| PSMC2    | 41 | 3.18E-04 | 2.10324675 | 0.4745539   | 0.1         | 4 | 144.2439024 | 0.77935065  | 68360   | 0.1077592   |
| UBE3A    | 28 | 3.18E-04 | 2.1487013  | 0.4653974   | 0.07407407  | 4 | 167.9285714 | 0.77025974  | 30212   | 0.13112923  |
| NUP153   | 41 | 3.11E-04 | 2.05844156 | 0.48580442  | 0.1         | 3 | 154.2439024 | 0.78831169  | 73134   | 0.10965201  |
| MINBL1   | 58 | 3.10E-04 | 2.01298701 | 0.49677419  | 0.07743497  | 4 | 204.1551724 | 0.7974026   | 198998  | 0.1398688   |
| HEG1     | 65 | 3.10E-04 | 2.02142857 | 0.49499965  | 0.05048077  | 4 | 199.9840174 | 0.79771429  | 247394  | 0.1348471   |
| NNT      | 28 | 3.10E-04 | 2.0961039  | 0.47707559  | 0.13492063  | 4 | 203.25      | 0.78077922  | 37834   | 0.14906718  |
| PIPAK2A  | 61 | 3.08E-04 | 2.01298701 | 0.49677419  | 0.09180328  | 3 | 196.9344262 | 0.7974026   | 240650  | 0.13563286  |
| ELAVL1   | 48 | 3.07E-04 | 2.06818182 | 0.48351648  | 0.08776596  | 3 | 144.6458333 | 0.78636364  | 110910  | 0.1058876   |
| SIRT1    | 58 | 3.07E-04 | 2.00324675 | 0.49918963  | 0.11688312  | 4 | 196.6428571 | 0.79935065  | 139668  | 0.13131004  |
| HNRNP3A  | 61 | 3.07E-04 | 2.04935965 | 0.48795944  | 0.05087466  | 4 | 163.15      | 0.79012987  | 184825  | 0.13676718  |
| ELL2     | 71 | 3.06E-04 | 2.00064935 | 0.49983772  | 0.09577465  | 3 | 209.028169  | 0.79987013  | 225958  | 0.1424772   |
| LPL      | 30 | 3.04E-04 | 2.17402597 | 0.45997611  | 0.02985806  | 4 | 158.4333333 | 0.76519481  | 78806   | 0.1282697   |
| CPD      | 65 | 3.04E-04 | 2.02467532 | 0.49390635  | 0.05863385  | 3 | 181.3230769 | 0.79506494  | 250146  | 0.12656854  |
| UBE2V1   | 47 | 3.02E-04 | 2.04265714 | 0.48951049  | 0.10453284  | 4 | 203.1914894 | 0.79342857  | 125766  | 0.14256573  |
| REV3L    | 37 | 3.01E-04 | 2.04220779 | 0.48966514  | 0.1513515   | 4 | 220.432424  | 0.79155844  | 69110   | 0.15327219  |
| JAK1     | 59 | 3.00E-04 | 2.01623377 | 0.49597424  | 0.10526316  | 3 | 189.0344828 | 0.79675325  | 145832  | 0.12997439  |
| ZNF148   | 78 | 3.00E-04 | 1.99285714 | 0.50179211  | 0.06759907  | 4 | 199.3205128 | 0.80142857  | 328414  | 0.13539054  |
| RPA1     | 43 | 2.99E-04 | 2.07727272 | 0.48245614  | 0.08637874  | 4 | 147.1627907 | 0.78545455  | 80046   | 0.12656389  |
| PKN2     | 57 | 2.99E-04 | 2.02012987 | 0.49501768  | 0.06126568  | 3 | 184.4736842 | 0.79597403  | 191734  | 0.12765466  |
| CNT3     | 67 | 2.98E-04 | 2.0461039  | 0.48873174  | 0.03030303  | 4 | 190.72922   | 0.79072922  | 267162  | 0.12975341  |
| TANK     | 43 | 2.98E-04 | 2.02337662 | 0.49422336  | 0.11184939  | 3 | 210.255814  | 0.79532468  | 101070  | 0.14416053  |
| SRSF1    | 50 | 2.97E-04 | 2.12662338 | 0.47022901  | 0.0522449   | 4 | 143.94      | 0.77467532  | 121008  | 0.11147287  |
| SEMSA4   | 66 | 2.94E-04 | 2.01298701 | 0.49677419  | 0.05286065  | 3 | 183.8181818 | 0.7974026   | 246540  | 0.12688348  |
| NUP50    | 58 | 2.94E-04 | 2.02862338 | 0.49343159  | 0.05686631  | 3 | 187.741793  | 0.79467532  | 175472  | 0.13860015  |
| HDAC5    | 64 | 2.93E-04 | 2.01493206 | 0.495291291 | 0.05012984  | 4 | 186.1125    | 0.79701299  | 184952  | 0.13926189  |
| RAO21    | 47 | 2.93E-04 | 2.0356494  | 0.49138481  | 0.13320999  | 3 | 180.021766  | 0.79298701  | 80832   | 0.1251065   |
| CD93     | 47 | 2.92E-04 | 2.05519481 | 0.48657188  | 0.04810361  | 3 | 179.5319149 | 0.78896104  | 179068  | 0.12857535  |
| CD7      | 47 | 2.91E-04 | 2.03701299 | 0.49091489  | 0.09990749  | 3 | 185.893617  | 0.7925974   | 92064   | 0.12967885  |
| HP5A4    | 57 | 2.91E-04 | 2.03701299 | 0.49091489  | 0.12077295  | 3 | 170.195522  | 0.7925974   | 52838   | 0.11835051  |
| PSMA1    | 36 | 2.90E-04 | 2.05844156 | 0.495844156 | 0.12777778  | 4 | 214.277778  | 0.78831169  | 56932   | 0.13666022  |
| VIM      | 42 | 2.89E-04 | 2.02987013 | 0.49264235  | 0.1126597   | 3 | 207.380524  | 0.79402597  | 99430   | 0.14123559  |
| GRIP2    | 57 | 2.89E-04 | 2.07467532 | 0.48200313  | 0.03070175  | 3 | 159.5614035 | 0.78506494  | 228706  | 0.1335149   |
| CCPG1    | 56 | 2.87E-04 | 2.02277272 | 0.49438202  | 0.07597403  | 4 | 184.1701429 | 0.79545455  | 220836  | 0.12777228  |
| PIA2     | 46 | 2.86E-04 | 2.02077922 | 0.49454078  | 0.06888889  | 4 | 212.826687  | 0.79558442  | 150290  | 0.14611204  |
| TP53BP2  | 45 | 2.85E-04 | 2.04676623 | 0.4916986   | 0.1020203   | 4 | 183.755556  | 0.79124675  | 117746  | 0.12762675  |
| LPN2     | 56 | 2.84E-04 | 2.03376623 | 0.4916986   | 0.06103896  | 3 | 197.7321429 | 0.79324675  | 174308  | 0.13850235  |
| CDH6     | 72 | 2.83E-04 | 2.04350649 | 0.48253532  | 0.04225352  | 3 | 168.7638889 | 0.7912987   | 292002  | 0.12132096  |
| TMCC1    | 63 | 2.81E-04 | 2.02857143 | 0.49295775  | 0.04915515  | 4 | 196.8730159 | 0.79428571  | 252520  | 0.13831402  |
| NBE11A   | 63 | 2.81E-04 | 2.02402597 | 0.49406481  | 0.07526882  | 3 | 180.9047619 | 0.79519481  | 170892  | 0.12578096  |
| TGFB2    | 63 | 2.75E-04 | 2.01168831 | 0.49270949  | 0.10138249  | 4 | 193.860794  | 0.797166234 | 628018  | 0.1368385   |
| DYPD     | 49 | 2.73E-04 | 2.0356494  | 0.49138481  | 0.07482993  | 4 | 212.004082  | 0.79298701  | 146276  | 0.14806258  |
| YWHAH    | 33 | 2.73E-04 | 2.09935065 | 0.47633777  | 0.1780303   | 3 | 139.9090909 | 0.78012987  | 26146   | 0.10338417  |
| NOTCH2   | 66 | 2.71E-04 | 2.00324675 | 0.49918963  | 0.07599068  | 3 | 196.836364  | 0.79935065  | 255900  | 0.13425524  |
| ACTR3    | 38 | 2.70E-04 | 2.03831169 | 0.49062504  | 0.12371895  | 4 | 202.157795  | 0.7923766   | 92490   | 0.15433114  |
| WNT5A    | 58 | 2.69E-04 | 2.02467532 | 0.49201178  | 0.0584811   | 4 | 194.144716  | 0.79350649  | 218534  | 0.13976723  |
| CAPRN1   | 64 | 2.69E-04 | 2.02922078 | 0.4928      | 0.05208333  | 3 | 185.8125    | 0.79415584  | 270776  | 0.13057904  |
| UBR5     | 47 | 2.69E-04 | 2.04480519 | 0.48904414  | 0.07030527  | 3 | 202.769575  | 0.79103896  | 126942  | 0.14273299  |
| ZC3H13   | 45 | 2.66E-04 | 2.02987013 | 0.49264235  | 0.09229299  | 3 | 197.866667  | 0.79402597  | 121136  | 0.13979115  |
| KCTD12   | 70 | 2.66E-04 | 2.00212987 | 0.49501768  | 0.04972536  | 3 | 186.2       | 0.79597403  | 294140  | 0.13028211  |
| NRF2     | 46 | 2.66E-04 | 2.04220779 | 0.48966514  | 0.09173913  | 4 | 201.173913  | 0.79155844  | 122506  | 0.13804652  |
| HP5A8    | 35 | 2.65E-04 | 2.09285714 | 0.4778157   | 0.12605042  | 4 | 140.7142857 | 0.78142857  | 29828   | 0.10334838  |
| XPO1     | 43 | 2.64E-04 | 2.04675325 | 0.48857868  | 0.12292359  | 4 | 171.8372093 | 0.79064935  | 68108   | 0.12063953  |
| FAM129A  | 73 | 2.63E-04 | 1.9987013  | 0.50032489  | 0.07420091  | 3 | 207.095804  | 0.80025974  | 300140  | 0.14141216  |
| PAK2     | 51 | 2.62E-04 | 2.03831169 | 0.49062504  | 0.09862353  | 3 | 171.862451  | 0.7923766   | 119746  | 0.12550229  |
| RC1D     | 70 | 2.62E-04 | 2.02077922 | 0.49485861  | 0.115229412 | 4 | 193.281569  | 0.79584416  | 191118  | 0.13666022  |
| CEP350   | 62 | 2.62E-04 | 2.01038961 | 0.49741602  | 0.07244844  | 4 | 205.338797  | 0.79792208  | 236712  | 0.14069513  |
| DICER1   | 58 | 2.61E-04 | 2.05324675 | 0.48703352  | 0.05626134  | 4 | 176.2241379 | 0.78935065  | 178266  | 0.12648633  |
| DDX3X    | 50 | 2.61E-04 | 2.03116883 | 0.49323737  | 0.10204082  | 3 | 186.98      | 0.79376623  | 118362  | 0.12997218  |
| ALDH1A3  | 53 | 2.61E-04 | 2.05909091 | 0.48565121  | 0.0478955   | 4 | 174.1320755 | 0.78818182  | 204888  | 0.12550229  |
| CDH7     | 64 | 2.61E-04 | 2.05844156 | 0.49058416  | 0.09854322  | 4 | 208.987143  | 0.79883117  | 230722  | 0.1300898   |
| CDZC7    | 51 | 2.61E-04 | 2.02772773 | 0.49327354  | 0.10431373  | 4 | 182.254902  | 0.79454545  | 99364   | 0.12623483  |
| EIF5     | 60 | 2.60E-04 | 2.01818182 | 0.4954955   | 0.09491525  | 3 | 183.2       | 0.79636364  | 138960  | 0.12639752  |
| PTPRB    | 55 | 2.60E-04 | 2.01818182 | 0.4954955   | 0.07744106  | 3 | 199.3636364 | 0.79636364  | 150178  | 0.13732222  |
| MAPK4    | 55 | 2.57E-04 | 2.01883117 | 0.49533612  | 0.07991428  | 3 | 200.2549455 | 0.79623377  | 145578  | 0.13761949  |
| SYN2     | 57 | 2.56E-04 | 2.02727273 | 0.49327354  | 0.09327354  | 4 | 186.1157495 | 0.79454545  | 1259904 | 0.13995904  |
| FIN      | 41 | 2.56E-04 | 2.07012987 | 0.48306148  | 0.1474359   | 3 | 154.375     | 0.78597403  | 42968   | 0.11090158  |
| SEC23IP  | 53 | 2.55E-04 | 2.02027922 | 0.49454078  | 0.07184325  | 3 | 191.1132076 | 0.79558442  | 177812  | 0.13199724  |
| E1F4E    | 49 | 2.55E-04 | 2.03246753 | 0.49031278  | 0.07134694  | 4 | 197.755102  | 0.79350649  | 120488  | 0.13730159  |
| SP1D     | 76 | 2.54E-04 | 2.0604935  | 0.49825772  | 0.05847731  | 4 | 209.9347105 | 0.79987013  | 307754  | 0.13730159  |
| RCOR3    | 61 | 2.53E-04 | 2.00844156 | 0.49789848  | 0.08469848  | 4 | 198.118169  | 0.79831169  | 214511  | 0.14616448  |
| ANKA1    | 39 | 2.50E-04 | 2.04090909 | 0.48997773  | 0.10661269  | 3 | 216.974359  | 0.79181818  | 102068  | 0.15149886  |
| FND3B    | 72 | 2.49E-04 | 2.0025974  | 0.49935149  | 0.06416275  | 4 | 201.8888889 | 0.79948052  | 284012  | 0.1380624   |
| SRSF10   | 54 | 2.47E-04 | 2.01194805 | 0.47574915  | 0.03563941  | 4 | 161.777778  | 0.77961039  | 137688  | 0.12997218  |
| PHACTR4  | 49 | 2.47E-04 | 2.0356494  | 0.49138481  | 0.07991937  | 4 | 223.591867  | 0.79598701  | 186672  | 0.15586496  |
| TGFB2    | 68 | 2.46E-04 | 2.09220779 | 0.5019567   | 0.12818262  | 4 | 202.941765  | 0.80158442  | 141308  | 0.13666022  |
| ATXN7    | 54 | 2.45E-04 | 2.04480519 | 0.48904414  | 0.05310971  | 4 | 188.925926  | 0.79103896  | 171520  | 0.1334041   |
| CD2AP    | 55 | 2.43E-04 | 2.04155844 | 0.48982188  | 0.03973064  | 4 | 183.8363636 | 0.79168831  | 193478  | 0.13030518  |
| SCAMP1   | 67 | 2.42E-04 | 2.00974026 | 0.49757428  | 0.06558118  | 3 | 198.7079103 | 0.79805195  | 253006  | 0.13686611  |
| BAG1A5   | 42 | 2.42E-04 | 2.0519481  | 0.48657188  | 0.07084785  | 4 | 204.2657143 | 0.78896104  | 125346  | 0.14514326  |
| REST     | 58 | 2.41E-04 | 2.07012987 | 0.48306148  | 0.03387873  | 4 | 185.365517  | 0.78597403  | 193318  | 0.13666022  |
| ARMHAP12 | 44 | 2.41E-04 | 2.03246753 | 0.49201278  | 0.06871036  | 4 | 210.909091  | 0.79350649  | 130858  | 0.146611294 |
| CHL1     | 56 | 2.39E-04 | 2.04285714 | 0.48951049  | 0.0742026   | 3 | 188.7321429 | 0.79142857  | 203288  | 0.13399838  |
| ASCC3    | 56 | 2.38E-04 | 2.02337662 | 0.49422336  | 0.07207792  | 3 | 192.7321429 | 0.79532468  | 147328  | 0.13334157  |
| ZNF280D  | 45 | 2.38E-04 | 2.09025974 | 0.47849044  | 0.0232322   | 4 | 186.6       | 0.7834085   | 139870  | 0.13349007  |
| TCF3     | 54 | 2.37E-04 | 2.02844156 | 0.49789848  | 0.14814815  | 4 | 206.160296  | 0.79831169  | 195668  | 0.13666022  |
| PTPA42   | 65 | 2.36E-04 | 2.00324675 | 0.4991      |             |   |             |             |         |             |

|          |    |          |            |             |             |   |             |            |          |            |
|----------|----|----------|------------|-------------|-------------|---|-------------|------------|----------|------------|
| LPCT1    | 31 | 1.94E-04 | 2.12662338 | 0.47022901  | 0.0516129   | 4 | 171.8064516 | 0.77467532 | 71506    | 0.1314813  |
| TRAM2    | 54 | 1.94E-04 | 2.02792208 | 0.49311559  | 0.06848358  | 4 | 189.981485  | 0.79441558 | 173152   | 0.13159892 |
| NTSE     | 59 | 1.91E-04 | 2.0525974  | 0.4871876   | 0.09466984  | 3 | 221         | 0.78948052 | 77560    | 0.13509314 |
| FASTD2   | 66 | 1.91E-04 | 2.02896104 | 0.490441686 | 0.039146084 | 4 | 190.613121  | 0.79220779 | 225904   | 0.13564959 |
| NHLR2    | 63 | 1.91E-04 | 2.01168831 | 0.4970949   | 0.07424475  | 3 | 200.3809524 | 0.79766234 | 216286   | 0.13750803 |
| TFPI     | 41 | 1.91E-04 | 2.07662338 | 0.48155097  | 0.04146341  | 4 | 187.4878049 | 0.78467532 | 97022    | 0.13647515 |
| STAM     | 48 | 1.90E-04 | 2.03376623 | 0.4916986   | 0.06737589  | 3 | 215.0791667 | 0.79324675 | 168186   | 0.15052592 |
| GLS      | 47 | 1.88E-04 | 2.0538961  | 0.48687954  | 0.08140611  | 4 | 201         | 0.78922078 | 122298   | 0.14271035 |
| IL1H1    | 37 | 1.88E-04 | 2.0623177  | 0.48397234  | 0.07372927  | 4 | 190.6097561 | 0.78675325 | 105345   | 0.17451404 |
| AMMECR1  | 40 | 1.87E-04 | 2.15519481 | 0.46399518  | 0.02820513  | 4 | 153.25      | 0.76896104 | 117768   | 0.12788817 |
| SIAM1    | 24 | 1.87E-04 | 2.11493506 | 0.47282776  | 0.12318841  | 4 | 184.6666667 | 0.77701299 | 21452    | 0.13795466 |
| PLAZ64A  | 34 | 1.86E-04 | 2.07857143 | 0.48109966  | 0.07486631  | 4 | 173.4177647 | 0.78428571 | 76208    | 0.12653282 |
| KIAJ0468 | 31 | 1.85E-04 | 2.10519481 | 0.47612656  | 0.14628656  | 4 | 161         | 0.77896104 | 140218   | 0.13965674 |
| RNDC     | 36 | 1.85E-04 | 2.06233766 | 0.48488665  | 0.17201587  | 3 | 156.9722222 | 0.78753247 | 28822    | 0.12154545 |
| EP400    | 43 | 1.85E-04 | 2.08311688 | 0.48004988  | 0.0429679   | 4 | 174.4651163 | 0.78337662 | 131032   | 0.12824948 |
| BTBD3    | 60 | 1.84E-04 | 2.02272727 | 0.49438202  | 0.06610169  | 3 | 193.9166667 | 0.79545455 | 193948   | 0.13468844 |
| PTPN3    | 56 | 1.84E-04 | 2.04350649 | 0.48935494  | 0.04935065  | 3 | 177.9285714 | 0.7912987  | 168536   | 0.12625558 |
| DES12    | 44 | 1.84E-04 | 2.15928574 | 0.45602606  | 0.00317125  | 4 | 170.0909091 | 0.76142857 | 143878   | 0.14534562 |
| MCN      | 41 | 1.83E-04 | 2.04805195 | 0.48626886  | 0.11219512  | 3 | 190.6097561 | 0.79038961 | 72744    | 0.1340891  |
| RASSF2   | 55 | 1.83E-04 | 2.06948052 | 0.48321305  | 0.02154882  | 4 | 183.8       | 0.7861039  | 186622   | 0.13548344 |
| LAPTM5   | 44 | 1.83E-04 | 2.02337662 | 0.49422336  | 0.13424947  | 3 | 210.1363636 | 0.79532468 | 131516   | 0.14451292 |
| RANBP2   | 59 | 1.82E-04 | 2.03896104 | 0.49044586  | 0.13360324  | 4 | 175.8205128 | 0.79220779 | 54404    | 0.12199505 |
| APFC72   | 34 | 1.82E-04 | 2.03571429 | 0.49122807  | 0.0507306   | 4 | 215.7777778 | 0.79285714 | 175042   | 0.15238128 |
| WPF1     | 47 | 1.82E-04 | 2.05       | 0.48780488  | 0.09907409  | 3 | 197.244881  | 0.7912987  | 111780   | 0.13978106 |
| DYRK2    | 58 | 1.81E-04 | 2.00779221 | 0.49805951  | 0.0907441   | 4 | 214.7931035 | 0.79844156 | 186104   | 0.14619375 |
| PTBP3    | 51 | 1.81E-04 | 2.15519481 | 0.46399518  | 0.00784314  | 4 | 172.5294118 | 0.76896104 | 130650   | 0.14103802 |
| SLC26A2  | 55 | 1.79E-04 | 2.0461039  | 0.48873374  | 0.49115825  | 4 | 192.6727273 | 0.79077922 | 171874   | 0.13700421 |
| SAHMD4   | 56 | 1.79E-04 | 2.01233766 | 0.49693499  | 0.1025974   | 4 | 216.407143  | 0.79753247 | 199816   | 0.14788995 |
| TNFAIP2  | 33 | 1.78E-04 | 2.08311688 | 0.47885172  | 0.06439606  | 4 | 182.626906  | 0.78337662 | 7298     | 0.13564959 |
| SOCS5    | 45 | 1.77E-04 | 2.06948052 | 0.48321305  | 0.06060606  | 4 | 184.4       | 0.7861039  | 149982   | 0.1333977  |
| SCD      | 55 | 1.77E-04 | 2.02662338 | 0.49343159  | 0.07542088  | 4 | 200.2363636 | 0.79467532 | 159142   | 0.13882234 |
| BBX      | 52 | 1.76E-04 | 2.05454545 | 0.48672566  | 0.05580606  | 4 | 202.9615385 | 0.78909091 | 164930   | 0.14050888 |
| DVL3     | 46 | 1.76E-04 | 2.08411558 | 0.47975078  | 0.04521028  | 4 | 178.826087  | 0.78311688 | 108604   | 0.13205879 |
| ALG9     | 56 | 1.76E-04 | 2.06883117 | 0.49436472  | 0.04374143  | 3 | 190.6097561 | 0.78623743 | 179068   | 0.13466988 |
| MYO1B    | 37 | 1.75E-04 | 2.0487013  | 0.4881141   | 0.10960961  | 4 | 232         | 0.79025974 | 73688    | 0.16254096 |
| ADAM10   | 46 | 1.75E-04 | 2.03896104 | 0.49044586  | 0.0978454   | 4 | 201.2173913 | 0.79220779 | 119328   | 0.14038654 |
| TNIX     | 41 | 1.72E-04 | 2.03116883 | 0.49323737  | 0.11585366  | 3 | 220.7317073 | 0.79376623 | 82098    | 0.15238849 |
| CLU      | 38 | 1.72E-04 | 2.06038961 | 0.48534651  | 0.11095306  | 4 | 211.7894737 | 0.78792208 | 74998    | 0.15038128 |
| TPD52    | 59 | 1.71E-04 | 2.01038961 | 0.49741602  | 0.10057401  | 4 | 190.6097561 | 0.79792208 | 154538   | 0.13978106 |
| EIF4B    | 49 | 1.71E-04 | 2.04350649 | 0.48935494  | 0.089701    | 4 | 206.8372093 | 0.7912987  | 90970    | 0.14454033 |
| RBP1     | 23 | 1.70E-04 | 2.09155844 | 0.47811239  | 0.17989418  | 3 | 202.5357143 | 0.78168831 | 32084    | 0.1478921  |
| TOMM20   | 45 | 1.70E-04 | 2.04350649 | 0.48935494  | 0.06666667  | 4 | 197.9111111 | 0.7912987  | 112190   | 0.13890499 |
| MARCKS   | 54 | 1.70E-04 | 2.01883117 | 0.49533612  | 0.09014675  | 4 | 204.444444  | 0.79623777 | 152700   | 0.14030606 |
| GATE     | 56 | 1.69E-04 | 2.025974   | 0.47602122  | 0.04306122  | 4 | 179.488052  | 0.7832987  | 162576   | 0.1322957  |
| TXNDC5   | 44 | 1.69E-04 | 2.05909091 | 0.48565121  | 0.0602537   | 3 | 176.0881818 | 0.78818182 | 108114   | 0.12582911 |
| ELF1     | 32 | 1.68E-04 | 2.06883117 | 0.48336472  | 0.09475806  | 3 | 227.84375   | 0.78623377 | 75882    | 0.16279485 |
| PLEKHA1  | 54 | 1.68E-04 | 2.00974026 | 0.4957674   | 0.10132774  | 3 | 208.1348148 | 0.79805195 | 145142   | 0.14186598 |
| ATRN     | 49 | 1.68E-04 | 2.03961039 | 0.49828972  | 0.06717687  | 3 | 207.2244898 | 0.79027792 | 135622   | 0.14526147 |
| UBE2J1   | 41 | 1.68E-04 | 2.0753247  | 0.48166434  | 0.0428195   | 4 | 178.49351   | 0.7849351  | 144622   | 0.13961914 |
| ANKK5    | 26 | 1.67E-04 | 2.07142857 | 0.48275862  | 0.12        | 3 | 229.4651385 | 0.78571429 | 55312    | 0.16379121 |
| ANKA2    | 33 | 1.65E-04 | 2.06038961 | 0.4853451   | 0.09848485  | 3 | 239         | 0.78792208 | 66480    | 0.16941758 |
| EFEMP1   | 41 | 1.65E-04 | 2.0525974  | 0.4871766   | 0.12019467  | 3 | 204.195122  | 0.78948052 | 91784    | 0.1442558  |
| AMIGO2   | 59 | 1.65E-04 | 2.0519481  | 0.49870466  | 0.08591683  | 3 | 213.4067797 | 0.79896104 | 177950   | 0.14505294 |
| ENDOD1   | 52 | 1.64E-04 | 2.02922078 | 0.4928      | 0.06938163  | 4 | 190.6097561 | 0.79415584 | 142796   | 0.13466988 |
| RALGAPB  | 50 | 1.63E-04 | 2.1038961  | 0.47530864  | 0.07195918  | 4 | 172.7       | 0.77922078 | 157912   | 0.13211051 |
| RAB14    | 41 | 1.62E-04 | 2.05       | 0.48780488  | 0.07195122  | 3 | 195.9756098 | 0.79       | 113258   | 0.13821712 |
| SOAT1    | 56 | 1.62E-04 | 2.01883117 | 0.49533612  | 0.09935065  | 4 | 209.25      | 0.79623377 | 154118   | 0.14414936 |
| MTUS1    | 58 | 1.61E-04 | 2.00909091 | 0.49773756  | 0.10828796  | 3 | 204.8103488 | 0.79818182 | 148746   | 0.13599999 |
| YES1     | 51 | 1.59E-04 | 2.06883117 | 0.48336472  | 0.08585859  | 4 | 184.444444  | 0.78623777 | 70900    | 0.13978106 |
| IFI44L   | 56 | 1.59E-04 | 2.09805195 | 0.47663262  | 0.02207792  | 4 | 175.9107143 | 0.78038961 | 171238   | 0.13422232 |
| IL33     | 33 | 1.58E-04 | 2.06558442 | 0.48412449  | 0.08901515  | 3 | 206.6666667 | 0.78688312 | 59200    | 0.14740553 |
| ARID1A   | 50 | 1.58E-04 | 2.01818182 | 0.4954955   | 0.12326531  | 3 | 221.24      | 0.79636364 | 127660   | 0.15150685 |
| CASP1    | 38 | 1.58E-04 | 2.07402997 | 0.48515404  | 0.11805443  | 3 | 154.768421  | 0.78519481 | 35942    | 0.13116663 |
| NWTF     | 48 | 1.58E-04 | 2.0957429  | 0.49122807  | 0.06117031  | 4 | 190.6097561 | 0.79285714 | 150672   | 0.14079249 |
| LBH      | 41 | 1.57E-04 | 2.02922078 | 0.4928      | 0.10365854  | 3 | 219.365837  | 0.79415584 | 99204    | 0.15095765 |
| WASF3    | 44 | 1.55E-04 | 2.04285714 | 0.48951049  | 0.08879493  | 4 | 209.1818182 | 0.79142857 | 124112   | 0.14643812 |
| GN5      | 34 | 1.54E-04 | 2.05779221 | 0.48595772  | 0.07843137  | 4 | 217.0882353 | 0.78844156 | 94786    | 0.15364106 |
| NAP1L1   | 55 | 1.54E-04 | 2.04025974 | 0.49033367  | 0.0727227   | 4 | 182.4545454 | 0.79194805 | 138770   | 0.12899434 |
| PCGF3    | 41 | 1.54E-04 | 2.12077922 | 0.47152448  | 0.03211517  | 4 | 175.84416   | 0.79303376 | 125190   | 0.13304426 |
| PTGS1    | 55 | 1.53E-04 | 2.0525974  | 0.4871876   | 0.04713805  | 4 | 183.6       | 0.78948052 | 161838   | 0.13163219 |
| SPG7     | 55 | 1.53E-04 | 2.06168831 | 0.48503937  | 0.0907563   | 3 | 201.8285714 | 0.78766234 | 75432    | 0.14338512 |
| IVNS1ABP | 58 | 1.53E-04 | 2.00714286 | 0.48822064  | 0.12401694  | 3 | 226.6034483 | 0.79857143 | 148202   | 0.15040721 |
| TXNRD1   | 51 | 1.53E-04 | 2.01493506 | 0.49629392  | 0.12515082  | 4 | 214.9215886 | 0.79102299 | 126098   | 0.15350331 |
| DESL1    | 31 | 1.52E-04 | 2.09155844 | 0.47811239  | 0.07311831  | 3 | 186.806156  | 0.78311688 | 62508    | 0.13961914 |
| TNFAIP8  | 33 | 1.52E-04 | 2.06428571 | 0.48442907  | 0.09469697  | 3 | 188.484485  | 0.78714286 | 74258    | 0.13431029 |
| FCHSD2   | 52 | 1.52E-04 | 2.02077922 | 0.09728507  | 0.09728507  | 3 | 218.5       | 0.79584416 | 149578   | 0.15033882 |
| NID1     | 53 | 1.52E-04 | 2.01753247 | 0.49565497  | 0.07837446  | 3 | 210.5283019 | 0.79649351 | 153740   | 0.14360397 |
| SKAP1    | 46 | 1.52E-04 | 2.03441558 | 0.49154165  | 0.11111111  | 3 | 206         | 0.79311688 | 121424   | 0.13472917 |
| ATG13    | 56 | 1.51E-04 | 2.05       | 0.48780488  | 0.05269714  | 3 | 190.6097561 | 0.795226   | 155226   | 0.14079249 |
| TNMEM123 | 43 | 1.51E-04 | 2.04935065 | 0.48795944  | 0.0730897   | 3 | 199.3488372 | 0.79012987 | 114308   | 0.14078396 |
| EIF3B    | 27 | 1.51E-04 | 2.12532468 | 0.47051635  | 0.12535613  | 4 | 159.5185185 | 0.77493506 | 36114    | 0.15825474 |
| PECAM1   | 46 | 1.50E-04 | 2.0461039  | 0.48873374  | 0.06280193  | 4 | 201.0652174 | 0.79077922 | 130318   | 0.14178761 |
| CANX     | 36 | 1.49E-04 | 2.10974026 | 0.4733992   | 0.08235998  | 3 | 162.5727778 | 0.77805195 | 12102065 | 0.12202605 |
| ABR1     | 46 | 1.49E-04 | 2.02462753 | 0.49201278  | 0.11690821  | 4 | 186.806156  | 0.78950649 | 109572   | 0.14079249 |
| MED14    | 33 | 1.49E-04 | 2.0538961  | 0.48687954  | 0.15151515  | 3 | 194         | 0.78922078 | 37236    | 0.13623596 |
| DDX18    | 36 | 1.49E-04 | 2.06818182 | 0.48351648  | 0.06190476  | 4 | 197.5555556 | 0.78636364 | 74874    | 0.15178599 |
| KRCC5    | 30 | 1.49E-04 | 2.06363636 | 0.484351    | 0.11522048  | 4 | 197.368421  | 0.7872273  | 55508    | 0.14046334 |
| SPARC    | 38 | 1.49E-04 | 2.11948052 | 0.4871876   | 0.17816092  | 4 | 195.966667  | 0.7761039  | 48010    | 0.14862883 |
| SF3B1    | 37 | 1.48E-04 | 2.1485714  | 0.46666667  | 0.11689112  | 4 | 170.4207    | 0.77142857 | 28150    | 0.175102   |
| IL13RA1  | 31 | 1.48E-04 | 2.17142857 | 0.          |             |   |             |            |          |            |

|          |    |          |            |             |            |   |             |            |        |            |
|----------|----|----------|------------|-------------|------------|---|-------------|------------|--------|------------|
| SGK3     | 45 | 1.29E-04 | 2.06623377 | 0.48397234  | 0.06060606 | 4 | 207.5777778 | 0.78675325 | 106898 | 0.14936405 |
| WDR37    | 41 | 1.29E-04 | 2.05324675 | 0.48703352  | 0.07560976 | 3 | 210.365837  | 0.78935065 | 108876 | 0.14889795 |
| MAPKAPK5 | 20 | 1.28E-04 | 2.18051948 | 0.45860651  | 0.09473684 | 4 | 154.75      | 0.7638961  | 20844  | 0.12449734 |
| APPC5    | 34 | 1.28E-04 | 2.07402057 | 0.48215404  | 0.08030912 | 3 | 208.93941   | 0.78519481 | 61380  | 0.13837198 |
| AKAP12   | 52 | 1.28E-04 | 2.02532468 | 0.493748    | 0.09049774 | 3 | 208.903862  | 0.79493506 | 131486 | 0.14443474 |
| SPATL2L  | 24 | 1.28E-04 | 2.19480519 | 0.4556213   | 0.0288551  | 4 | 157.9166667 | 0.76103896 | 49584  | 0.13024283 |
| MTM1     | 26 | 1.28E-04 | 2.14220779 | 0.46680812  | 0.04       | 4 | 196.5       | 0.77155844 | 51610  | 0.15264798 |
| ATP13A3  | 43 | 1.28E-04 | 2.05064935 | 0.48765041  | 0.04761905 | 4 | 214         | 0.78987013 | 125348 | 0.15154547 |
| USP9L    | 48 | 1.28E-04 | 2.04285714 | 0.48951049  | 0.08156018 | 4 | 204.0625    | 0.79142857 | 125512 | 0.14501489 |
| TUBA1A   | 27 | 1.27E-04 | 2.1487013  | 0.4653974   | 0.16239316 | 4 | 160.1111111 | 0.77025974 | 27442  | 0.12473658 |
| TSPAN3   | 47 | 1.27E-04 | 2.05519481 | 0.48657188  | 0.05920444 | 4 | 199.0425532 | 0.78896104 | 118902 | 0.14879858 |
| PSMD1    | 26 | 1.25E-04 | 2.1525974  | 0.46455505  | 0.17846154 | 4 | 147.5       | 0.76948052 | 17016  | 0.1152944  |
| SFQF     | 37 | 1.25E-04 | 2.07012987 | 0.48306148  | 0.10510511 | 4 | 210.2162162 | 0.78597403 | 68008  | 0.15102881 |
| PARR     | 32 | 1.24E-04 | 2.09675325 | 0.47692784  | 0.0988812  | 4 | 179.824286  | 0.78864895 | 49042  | 0.13687346 |
| RLS2401  | 30 | 1.24E-04 | 2.07987013 | 0.48079925  | 0.12643678 | 3 | 223.9       | 0.78402597 | 35990  | 0.16161252 |
| RASA1    | 36 | 1.24E-04 | 2.06363636 | 0.4845815   | 0.0311746  | 3 | 207.8333333 | 0.78727273 | 72664  | 0.14807555 |
| LYST     | 53 | 1.22E-04 | 2.01818182 | 0.4954955   | 0.06486866 | 3 | 220.5471698 | 0.79636364 | 146452 | 0.15170954 |
| PRK1     | 30 | 1.22E-04 | 2.09545455 | 0.47722343  | 0.16738169 | 4 | 187.3333333 | 0.78909099 | 35016  | 0.13741746 |
| NAMPT    | 40 | 1.21E-04 | 2.08571429 | 0.47945205  | 0.03717949 | 4 | 189.205     | 0.78285714 | 118824 | 0.13924354 |
| TGM2     | 45 | 1.21E-04 | 2.03376623 | 0.4916986   | 0.15059055 | 3 | 214.2666667 | 0.79324675 | 89378  | 0.14857451 |
| CD36     | 45 | 1.20E-04 | 2.03311688 | 0.49185564  | 0.1        | 4 | 209.7777778 | 0.79337662 | 101810 | 0.14551623 |
| IPOS     | 46 | 1.20E-04 | 2.07402597 | 0.48215404  | 0.08019324 | 4 | 175.7608696 | 0.78519481 | 89330  | 0.1273472  |
| OPT19L1  | 36 | 1.20E-04 | 2.13111688 | 0.46879756  | 0.03133333 | 4 | 162.8333333 | 0.7737662  | 97586  | 0.12676038 |
| B2M      | 16 | 1.20E-04 | 2.25779221 | 0.44291956  | 0.13313333 | 4 | 157.5625    | 0.74844156 | 9506   | 0.13970915 |
| CAND1    | 49 | 1.19E-04 | 2.02662338 | 0.49343159  | 0.13010204 | 3 | 213.6122449 | 0.79467532 | 110680 | 0.14749408 |
| CROCC    | 26 | 1.18E-04 | 2.09415584 | 0.47751938  | 0.08923077 | 3 | 230.2307692 | 0.78116883 | 62362  | 0.16884107 |
| FAS      | 37 | 1.18E-04 | 2.06103896 | 0.48519219  | 0.12162162 | 4 | 186.027027  | 0.78779221 | 44454  | 0.13208308 |
| RCN1     | 42 | 1.18E-04 | 2.07012987 | 0.48991489  | 0.09295121 | 4 | 209.8095238 | 0.7925974  | 91562  | 0.14576922 |
| MALT1    | 54 | 1.17E-04 | 2.04857325 | 0.48857688  | 0.0988812  | 4 | 179.49035   | 0.79049035 | 13958  | 0.1454163  |
| ZNFX2    | 23 | 1.17E-04 | 2.13116883 | 0.46922608  | 0.07509881 | 4 | 215.130438  | 0.77376623 | 44302  | 0.16377253 |
| LAPTM4B  | 30 | 1.17E-04 | 2.08246753 | 0.48019956  | 0.06206897 | 4 | 218.6666667 | 0.78350649 | 82572  | 0.13818822 |
| LAMC2    | 52 | 1.17E-04 | 2.02922078 | 0.4928      | 0.08220211 | 3 | 204.3269231 | 0.79415584 | 143150 | 0.14210963 |
| BAG5     | 46 | 1.16E-04 | 2.12792208 | 0.474994202 | 0.01923267 | 4 | 177.8478261 | 0.77441558 | 117472 | 0.13917276 |
| HMG20A   | 45 | 1.16E-04 | 2.0512987  | 0.47498604  | 0.09295121 | 4 | 202.7272727 | 0.78974026 | 13184  | 0.145682   |
| SOX9     | 47 | 1.15E-04 | 2.03766234 | 0.49075844  | 0.07678076 | 3 | 215.829782  | 0.79246753 | 121684 | 0.15085553 |
| E1F3     | 33 | 1.15E-04 | 2.06948052 | 0.48321305  | 0.13825758 | 4 | 200.1212121 | 0.7861039  | 43234  | 0.14300258 |
| AURKAIP1 | 29 | 1.15E-04 | 2.12857143 | 0.46979866  | 0.04187192 | 4 | 218.739103  | 0.77428571 | 58848  | 0.1675104  |
| SS18     | 34 | 1.15E-04 | 2.06753247 | 0.48666834  | 0.08734403 | 3 | 203.441765  | 0.78649351 | 77860  | 0.14568838 |
| CBR4     | 52 | 1.15E-04 | 2.02103896 | 0.47415602  | 0.1075641  | 4 | 212.842077  | 0.79722028 | 139968 | 0.14790315 |
| ALDH18A1 | 31 | 1.14E-04 | 2.11038961 | 0.47384615  | 0.05806452 | 4 | 182.2903226 | 0.77792208 | 53002  | 0.13650433 |
| SMARCC1  | 41 | 1.14E-04 | 2.04220779 | 0.48966614  | 0.1583659  | 4 | 201.6826268 | 0.79155844 | 60312  | 0.14054559 |
| CN8B1    | 28 | 1.14E-04 | 2.13116883 | 0.46922608  | 0.11111111 | 4 | 156.6428571 | 0.77376623 | 33470  | 0.1397398  |
| AZIN1    | 55 | 1.13E-04 | 2.01883117 | 0.47548515  | 0.13737374 | 4 | 216.4727273 | 0.79623377 | 128956 | 0.14578428 |
| GALNT7   | 51 | 1.13E-04 | 2.02896104 | 0.49045486  | 0.06908092 | 4 | 199.0454545 | 0.78649351 | 73682  | 0.1476682  |
| GLP1R1   | 47 | 1.13E-04 | 2.05974026 | 0.48549811  | 0.05272895 | 4 | 197.5957447 | 0.78805195 | 122602 | 0.1417116  |
| PAWR     | 24 | 1.13E-04 | 2.12857143 | 0.46979866  | 0.0543783  | 3 | 199.9583333 | 0.77428571 | 44920  | 0.1523855  |
| MAGI2    | 49 | 1.12E-04 | 2.03766234 | 0.49075844  | 0.09098639 | 3 | 207.1623653 | 0.79246753 | 113032 | 0.14491367 |
| CRNN1    | 35 | 1.11E-04 | 2.0987013  | 0.47648515  | 0.07508844 | 4 | 177.9142857 | 0.78025974 | 48610  | 0.13153001 |
| FZD1     | 38 | 1.10E-04 | 2.06558442 | 0.48412149  | 0.10110811 | 4 | 192.761579  | 0.78688112 | 78640  | 0.1379011  |
| ATRX     | 40 | 1.10E-04 | 2.12987013 | 0.4695122   | 0.02948718 | 4 | 179.3       | 0.77402597 | 92720  | 0.13877036 |
| AMACR    | 37 | 1.10E-04 | 2.10779221 | 0.4743007   | 0.07537574 | 4 | 196.8108108 | 0.78844156 | 95140  | 0.14825089 |
| SRPK2    | 39 | 1.09E-04 | 2.05974026 | 0.48549811  | 0.1207867  | 3 | 197.8205128 | 0.78805195 | 66652  | 0.14039781 |
| ONQA     | 36 | 1.09E-04 | 2.0480519  | 0.48904414  | 0.11420795 | 4 | 213.6944444 | 0.79103896 | 105863 | 0.15588463 |
| TOR1AIP1 | 47 | 1.09E-04 | 2.02987013 | 0.49264235  | 0.08698548 | 4 | 228.936548  | 0.79402597 | 102364 | 0.15796661 |
| STK39    | 35 | 1.09E-04 | 2.04480519 | 0.48904414  | 0.14789916 | 3 | 221.0857143 | 0.79103896 | 66758  | 0.15430966 |
| D1EXF    | 46 | 1.09E-04 | 2.2012987  | 0.45427729  | 0.9666-04  | 4 | 164.2608696 | 0.75974026 | 128556 | 0.14212737 |
| HNRNP1   | 28 | 1.09E-04 | 2.12597403 | 0.47037263  | 0.15079365 | 4 | 150.25      | 0.77480519 | 24916  | 0.11391205 |
| SKN1     | 26 | 1.08E-04 | 2.15519481 | 0.46399538  | 0.15384615 | 4 | 184.4320769 | 0.78696104 | 25910  | 0.1321205  |
| RHM2     | 42 | 1.07E-04 | 2.06428571 | 0.46428571  | 0.08242027 | 4 | 194.320013  | 0.78714286 | 83018  | 0.13902129 |
| NCK1     | 24 | 1.07E-04 | 2.26753247 | 0.44100802  | 0.10869565 | 4 | 96.375      | 0.74649351 | 10772  | 0.08726201 |
| GBP2     | 25 | 1.07E-04 | 2.13051948 | 0.46936099  | 0.06666667 | 4 | 217.68      | 0.7738961  | 41854  | 0.16611154 |
| CDH1     | 47 | 1.07E-04 | 2.0461039  | 0.48873174  | 0.12884864 | 3 | 195.893617  | 0.79077922 | 83014  | 0.13775922 |
| MCXYC    | 43 | 1.07E-04 | 2.0487013  | 0.4861639   | 0.11420795 | 4 | 213.4186047 | 0.79025974 | 94900  | 0.14973593 |
| TUSC1    | 41 | 1.06E-04 | 2.0512987  | 0.48749804  | 0.0895122  | 4 | 197.365837  | 0.78974026 | 96020  | 0.1496218  |
| ACTN1    | 41 | 1.05E-04 | 2.03181818 | 0.49217002  | 0.19512195 | 4 | 221.975698  | 0.79363636 | 51314  | 0.15298112 |
| SOD2     | 24 | 1.05E-04 | 2.10194805 | 0.47574915  | 0.12318841 | 4 | 215.6666667 | 0.77961039 | 37074  | 0.15892933 |
| IQGAP1   | 43 | 1.05E-04 | 2.02857143 | 0.4929575   | 0.12846069 | 3 | 213.1488372 | 0.79428571 | 80732  | 0.14691844 |
| PCNA3    | 34 | 1.05E-04 | 2.11493506 | 0.48728276  | 0.0516934  | 4 | 172.441765  | 0.7701299  | 49912  | 0.14017744 |
| UNAF1    | 46 | 1.05E-04 | 2.04805195 | 0.48826386  | 0.10513409 | 3 | 203.895951  | 0.79038961 | 85446  | 0.14761204 |
| GAD45G   | 22 | 1.05E-04 | 2.12272727 | 0.47109208  | 0.15151515 | 4 | 223.6363636 | 0.77545455 | 27966  | 0.16839077 |
| ST6GAL1  | 44 | 1.04E-04 | 2.03571429 | 0.49122807  | 0.09302326 | 3 | 225.2272727 | 0.79285714 | 95180  | 0.15676437 |
| HSPA13   | 43 | 1.04E-04 | 2.07727273 | 0.48140044  | 0.04201895 | 4 | 206.8837209 | 0.78454545 | 116884 | 0.15121257 |
| SLC35E28 | 33 | 1.03E-04 | 2.26103896 | 0.47242755  | 0.00189394 | 4 | 151.1212121 | 0.74779221 | 80650  | 0.13828997 |
| LEPROT   | 44 | 1.03E-04 | 2.06428571 | 0.48428571  | 0.05267389 | 4 | 195.2045455 | 0.78714286 | 108312 | 0.14023593 |
| VPS26A   | 35 | 1.03E-04 | 2.07012987 | 0.48306148  | 0.12941716 | 3 | 194.4285714 | 0.78597403 | 58824  | 0.13933436 |
| HTATIP2  | 25 | 1.02E-04 | 2.11363636 | 0.47311828  | 0.11       | 4 | 210.12      | 0.77772727 | 34396  | 0.15686333 |
| KCTD3    | 44 | 1.01E-04 | 2.04350649 | 0.48935494  | 0.102537   | 3 | 219.2727273 | 0.7912987  | 98276  | 0.1538118  |
| CLU1     | 36 | 1.01E-04 | 2.07077922 | 0.48703352  | 0.0703587  | 4 | 213.7777778 | 0.78984416 | 62176  | 0.15406817 |
| SC11A    | 24 | 1.01E-04 | 2.11558442 | 0.47246263  | 0.07710131 | 4 | 202.943131  | 0.77688112 | 46038  | 0.1379011  |
| PER1     | 29 | 1.00E-04 | 2.06493506 | 0.48427673  | 0.17243139 | 4 | 239.3103448 | 0.78701299 | 33672  | 0.16957892 |
| MSH2     | 21 | 1.00E-04 | 2.16623377 | 0.4616307   | 0.18571429 | 4 | 163.1904762 | 0.76675325 | 12162  | 0.12917091 |
| CCSER2   | 47 | 9.99E-05 | 2.1806494  | 0.4576523   | 9.25E-04   | 4 | 174.8510638 | 0.76298701 | 128904 | 0.14875416 |
| MYO1D    | 37 | 9.95E-05 | 2.03831169 | 0.4906021   | 0.14114134 | 4 | 233.243243  | 0.79237366 | 74874  | 0.16186207 |
| PXN8     | 38 | 9.94E-05 | 2.07373662 | 0.48230504  | 0.08236313 | 4 | 188.2368421 | 0.78514286 | 74610  | 0.15676437 |
| MDI7     | 25 | 9.92E-05 | 2.12857143 | 0.46979866  | 0.15       | 3 | 177.2       | 0.77428571 | 23922  | 0.13462006 |
| HNRNP2   | 28 | 9.90E-05 | 2.19285714 | 0.45602606  | 0.08949709 | 4 | 134.6785714 | 0.76142857 | 22420  | 0.1209736  |
| HEY1     | 35 | 9.90E-05 | 2.07402597 | 0.48215404  | 0.12605042 | 4 | 194.174286  | 0.78519481 | 80816  | 0.13981062 |
| ST15     | 38 | 9.90E-05 | 2.08766234 | 0.47900467  | 0.0455192  | 4 | 186.7589474 | 0.78246753 | 92930  | 0.13729977 |
| CRPSD2   | 42 | 9.90E-05 | 2.05124075 | 0.48703352  | 0.0852349  | 4 | 195.595281  | 0.78935065 | 82442  | 0.15126724 |
| STA2     | 39 | 9.88E-05 | 2.06558442 | 0           |            |   |             |            |        |            |

|           |    |          |            |            |            |   |             |            |        |            |
|-----------|----|----------|------------|------------|------------|---|-------------|------------|--------|------------|
| ACTG1     | 24 | 8.51E-05 | 2.15       | 0.46511628 | 0.11956522 | 4 | 166.125     | 0.77       | 26572  | 0.1292153  |
| ILF2      | 28 | 8.50E-05 | 2.15       | 0.46511628 | 0.12189361 | 4 | 165.6785714 | 0.77       | 16842  | 0.1292066  |
| MSL1      | 25 | 8.49E-05 | 2.0742857  | 0.48275862 | 0.16073096 | 4 | 218.5714286 | 0.78774229 | 68832  | 0.15672394 |
| PMASE4    | 38 | 8.49E-05 | 2.0742857  | 0.48275862 | 0.03840643 | 4 | 168.032158  | 0.78774229 | 75782  | 0.16324643 |
| PROM1     | 35 | 8.46E-05 | 2.06428571 | 0.48442907 | 0.09243697 | 4 | 207.8857143 | 0.78714286 | 68630  | 0.14809083 |
| AIDA      | 39 | 8.45E-05 | 2.08441558 | 0.47975078 | 0.04723347 | 4 | 190.6410256 | 0.78311688 | 87226  | 0.13995098 |
| CSF2R8    | 29 | 8.44E-05 | 2.12402597 | 0.47080404 | 0.12008966 | 3 | 175.9310345 | 0.77519481 | 45960  | 0.13365675 |
| GRI1      | 28 | 8.38E-05 | 2.16038961 | 0.46297947 | 0.07407407 | 3 | 171.9642857 | 0.76792208 | 46206  | 0.13636106 |
| IRAN      | 28 | 8.38E-05 | 2.1        | 0.47619048 | 0.15793965 | 4 | 187.731429  | 0.781429   | 2808   | 0.13800997 |
| FLG2      | 40 | 8.32E-05 | 2.13766234 | 0.46780073 | 0.01666667 | 4 | 191.275     | 0.77246753 | 104026 | 0.15060917 |
| GNAI3     | 43 | 8.31E-05 | 2.03636364 | 0.49107143 | 0.03023236 | 4 | 201.5348837 | 0.79277277 | 83704  | 0.13984152 |
| PRKD3     | 42 | 8.29E-05 | 2.10844156 | 0.47428395 | 0.03047944 | 4 | 190.8333333 | 0.77831169 | 109566 | 0.14488675 |
| GMB1      | 40 | 8.21E-05 | 2.05714286 | 0.48611111 | 0.08717949 | 4 | 219.6       | 0.78857143 | 85180  | 0.15578424 |
| VTCL1     | 48 | 8.20E-05 | 2.06103896 | 0.48512919 | 0.09358974 | 4 | 198.425     | 0.78779221 | 81862  | 0.1413578  |
| PGD       | 38 | 8.18E-05 | 2.11818182 | 0.472103   | 0.07671958 | 4 | 188.9642857 | 0.77636364 | 53522  | 0.14245283 |
| MMMD      | 27 | 8.15E-05 | 2.05974026 | 0.48549811 | 0.08108108 | 4 | 209.7027027 | 0.78805195 | 82008  | 0.14894639 |
| NUP160    | 28 | 8.12E-05 | 2.1025974  | 0.47560222 | 0.07671958 | 4 | 191.0714286 | 0.77948052 | 46552  | 0.14129745 |
| LAPTM4A   | 22 | 8.08E-05 | 2.13246753 | 0.46894032 | 0.06926407 | 4 | 221.2272727 | 0.77350649 | 28226  | 0.13686759 |
| IRF114    | 20 | 8.04E-05 | 2.23441558 | 0.44754432 | 0.0364211  | 4 | 180.35      | 0.75311688 | 25998  | 0.15562771 |
| CAV2      | 35 | 8.02E-05 | 2.12012987 | 0.47166922 | 0.0487395  | 4 | 185.6285714 | 0.77597403 | 57190  | 0.14143948 |
| EGLN3     | 32 | 7.99E-05 | 2.11818182 | 0.472103   | 0.06021505 | 4 | 193         | 0.77636364 | 53016  | 0.14644916 |
| PNMA2     | 36 | 7.99E-05 | 2.08610309 | 0.47855121 | 0.06571429 | 4 | 177.9444444 | 0.78207792 | 69918  | 0.13069853 |
| ANKX4     | 37 | 7.99E-05 | 2.04415584 | 0.48919949 | 0.18216216 | 3 | 245.151351  | 0.79110883 | 58970  | 0.17102657 |
| DBRL1     | 29 | 7.98E-05 | 2.08831169 | 0.47880572 | 0.1091113  | 4 | 196.2344828 | 0.78337366 | 42884  | 0.14280499 |
| P5P1      | 32 | 7.97E-05 | 2.11753247 | 0.47224778 | 0.0540323  | 4 | 188.40625   | 0.77649351 | 52412  | 0.14288089 |
| LINC7     | 47 | 7.95E-05 | 2.07597403 | 0.4817016  | 0.04810361 | 4 | 196.3617021 | 0.78480519 | 112488 | 0.14339928 |
| KDM58     | 42 | 7.91E-05 | 2.04155844 | 0.48982188 | 0.0943089  | 4 | 220.7857143 | 0.79168831 | 92324  | 0.15403915 |
| CMB1      | 40 | 7.88E-05 | 2.05909091 | 0.4856511  | 0.08675385 | 3 | 214.25      | 0.78818182 | 84912  | 0.15525641 |
| NR02      | 20 | 7.83E-05 | 2.12441558 | 0.46851232 | 0.04149425 | 4 | 173.830     | 0.77116888 | 21570  | 0.1457307  |
| SDCBP     | 21 | 7.83E-05 | 2.13831169 | 0.46765867 | 0.05714286 | 4 | 209.8573429 | 0.77237366 | 24510  | 0.16067777 |
| UZAF2     | 25 | 7.80E-05 | 2.1461039  | 0.46596067 | 0.12       | 4 | 162.84      | 0.77077922 | 15458  | 0.12640249 |
| CTGF      | 31 | 7.77E-05 | 2.05909091 | 0.48565121 | 0.15608955 | 3 | 236.0645161 | 0.78818182 | 57484  | 0.16695204 |
| KDELK3    | 25 | 7.77E-05 | 2.26818182 | 0.44088176 | 0.0133333  | 4 | 156.72      | 0.74636364 | 34176  | 0.14325069 |
| GALNT12   | 32 | 7.74E-05 | 2.16753247 | 0.46135541 | 0.08926407 | 4 | 196.4909091 | 0.76649351 | 31706  | 0.14266802 |
| DRAM1     | 38 | 7.69E-05 | 2.08311688 | 0.48004988 | 0.0469146  | 4 | 198.3947368 | 0.78337366 | 85366  | 0.14515134 |
| GINS1     | 37 | 7.69E-05 | 2.12987013 | 0.4695122  | 0.0303003  | 4 | 178.8648649 | 0.77402597 | 71612  | 0.1383545  |
| TBK1      | 28 | 7.69E-05 | 2.06493506 | 0.48427673 | 0.12698413 | 4 | 212.3928571 | 0.78701299 | 39512  | 0.15047585 |
| FZRL1     | 21 | 7.68E-05 | 2.11558442 | 0.47268263 | 0.0133333  | 3 | 231.476305  | 0.77688312 | 25034  | 0.17298857 |
| TPM1      | 41 | 7.66E-05 | 2.0512987  | 0.48749604 | 0.1097161  | 4 | 196.5609754 | 0.78974026 | 75558  | 0.14368483 |
| GDJ2      | 31 | 7.65E-05 | 2.07337662 | 0.48230504 | 0.07741935 | 4 | 209.8064516 | 0.78532468 | 49698  | 0.15077744 |
| SGP1      | 33 | 7.63E-05 | 2.10649351 | 0.47472256 | 0.06628788 | 3 | 180.8181818 | 0.7787013  | 61832  | 0.13549914 |
| KIFAP3    | 17 | 7.62E-05 | 2.17012987 | 0.46080192 | 0.09558824 | 4 | 262.7058824 | 0.76597403 | 31322  | 0.20385668 |
| ZBN1      | 31 | 7.61E-05 | 2.06233766 | 0.48488665 | 0.0125281  | 4 | 220.7096774 | 0.78751247 | 54936  | 0.16341547 |
| CAMSA2P   | 30 | 7.59E-05 | 2.20960309 | 0.48375553 | 0.0190425  | 4 | 202.735     | 0.74207792 | 72350  | 0.14424499 |
| SPAST     | 35 | 7.57E-05 | 2.11818182 | 0.472103   | 0.04705882 | 4 | 193.9428571 | 0.77636364 | 66544  | 0.14726779 |
| TRIP12    | 17 | 7.57E-05 | 2.17402597 | 0.45997611 | 0.04705882 | 4 | 194.4705882 | 0.76519481 | 12174  | 0.1548629  |
| RPS6K1    | 33 | 7.56E-05 | 2.07142857 | 0.48275862 | 0.09090909 | 3 | 209.5151515 | 0.78571429 | 65300  | 0.15049125 |
| HPNA2     | 20 | 7.55E-05 | 2.16369836 | 0.46218487 | 0.0133333  | 4 | 195.9       | 0.76772723 | 20312  | 0.15433412 |
| MDI1      | 19 | 7.52E-05 | 2.12727273 | 0.47080847 | 0.10718954 | 3 | 213.1111111 | 0.77454545 | 9158   | 0.16079665 |
| HLCS1     | 18 | 7.52E-05 | 2.18701299 | 0.45724466 | 0.1372549  | 3 | 173.1111111 | 0.7625974  | 19142  | 0.14056007 |
| RG54      | 33 | 7.51E-05 | 2.10909091 | 0.47413793 | 0.06439394 | 4 | 187.3333333 | 0.77818182 | 71094  | 0.14029349 |
| KMT5B     | 37 | 7.48E-05 | 2.25       | 0.44444444 | 0          | 4 | 170.2432432 | 0.75       | 86822  | 0.15948665 |
| ANKN1     | 28 | 7.41E-05 | 2.14970505 | 0.4652568  | 0.07930508 | 4 | 172.9642857 | 0.77012987 | 40972  | 0.13921854 |
| CTC8      | 19 | 7.40E-05 | 2.31168831 | 0.46478819 | 0.04678819 | 4 | 216.7476884 | 0.73766234 | 15438  | 0.14234848 |
| PSL1      | 37 | 7.37E-05 | 2.10324675 | 0.47545539 | 0.08408408 | 4 | 184.6216162 | 0.77935065 | 72940  | 0.13751158 |
| GADD45B   | 37 | 7.36E-05 | 2.0512987  | 0.48749604 | 0.10909091 | 4 | 218.8378378 | 0.78974026 | 59148  | 0.15383738 |
| POGK      | 35 | 7.34E-05 | 2.09155844 | 0.47811239 | 0.0654622  | 4 | 206.4285714 | 0.78168831 | 71696  | 0.15213139 |
| VCAN      | 28 | 7.30E-05 | 2.04959065 | 0.48795944 | 0.07396871 | 4 | 221.4210526 | 0.79012987 | 74988  | 0.15588059 |
| TNC       | 32 | 7.26E-05 | 2.18896104 | 0.45683773 | 0.05833333 | 4 | 2125        | 0.76220779 | 65883  | 0.16688833 |
| SART3     | 31 | 7.26E-05 | 2.08896104 | 0.47870687 | 0.09247312 | 4 | 199.1612903 | 0.78220779 | 41506  | 0.14546784 |
| MYOF      | 32 | 7.25E-05 | 2.08506494 | 0.47960137 | 0.09677419 | 4 | 209.4375    | 0.78298701 | 56950  | 0.15242626 |
| ENO1      | 33 | 7.23E-05 | 2.09090909 | 0.47826087 | 0.04166667 | 4 | 204.8181818 | 0.78181818 | 48228  | 0.14972089 |
| CSJANACT2 | 36 | 7.20E-05 | 2.07597403 | 0.4817016  | 0.06190476 | 4 | 210.3888889 | 0.78480519 | 72882  | 0.15202458 |
| NRNCL     | 30 | 7.18E-05 | 2.09285714 | 0.47781357 | 0.0871795  | 4 | 185.7       | 0.78142857 | 71488  | 0.13788889 |
| EPB414A   | 47 | 7.16E-05 | 2.05194805 | 0.48734177 | 0.11738649 | 4 | 196.372093  | 0.78961039 | 81122  | 0.13856658 |
| RTN3      | 23 | 7.15E-05 | 2.08571429 | 0.47945205 | 0.08262108 | 4 | 212.962963  | 0.78285714 | 45896  | 0.15452271 |
| DNAI814   | 31 | 7.11E-05 | 2.0714286  | 0.47457627 | 0.05806452 | 4 | 188.741936  | 0.7857143  | 54994  | 0.14054613 |
| ZBN1      | 43 | 7.09E-05 | 2.05       | 0.48780488 | 0.08748616 | 4 | 188.741936  | 0.7857143  | 54994  | 0.14054613 |
| CTSS      | 42 | 7.06E-05 | 2.08051948 | 0.48564919 | 0.08748616 | 4 | 188.741936  | 0.7857143  | 54994  | 0.14054613 |
| HMRNPK    | 26 | 7.06E-05 | 2.12987013 | 0.4695122  | 0.14461538 | 4 | 148.3076923 | 0.77402597 | 14758  | 0.11269581 |
| ENP4      | 36 | 7.05E-05 | 2.11753247 | 0.47224778 | 0.04603175 | 4 | 187.3055556 | 0.77649351 | 82030  | 0.14242193 |
| SNK2      | 20 | 7.05E-05 | 2.04534748 | 0.45347488 | 0.11052634 | 4 | 152.15      | 0.75896104 | 15920  | 0.12639235 |
| ST3GAL4   | 31 | 7.02E-05 | 2.08701299 | 0.47971537 | 0.10576354 | 3 | 204.0967742 | 0.7825974  | 54994  | 0.14868805 |
| ADNP      | 35 | 6.94E-05 | 2.07662338 | 0.48155097 | 0.0789915  | 4 | 198.8857143 | 0.78675312 | 64870  | 0.14783791 |
| SACS      | 23 | 6.94E-05 | 2.12532468 | 0.47051635 | 0.07905138 | 4 | 209.2719313 | 0.77493506 | 34958  | 0.15862798 |
| IFIT5     | 31 | 6.93E-05 | 2.12662338 | 0.47022901 | 0.06236559 | 4 | 195.2903226 | 0.77467532 | 62142  | 0.14904261 |
| DOX5      | 28 | 6.92E-05 | 2.10649351 | 0.47472256 | 0.1031746  | 4 | 188.3214286 | 0.7787013  | 40506  | 0.13957429 |
| RNF138    | 43 | 6.91E-05 | 2.04480519 | 0.48904414 | 0.0401639  | 4 | 177.1395349 | 0.79103896 | 82038  | 0.15312346 |
| PRC11     | 42 | 6.90E-05 | 2.0405974  | 0.49913367 | 0.12311266 | 4 | 217.380924  | 0.79148025 | 79992  | 0.16519203 |
| PDA5      | 15 | 6.86E-05 | 2.13896104 | 0.4675167  | 0.13333333 | 4 | 345.5333333 | 0.77220779 | 21076  | 0.26381462 |
| RPL5      | 20 | 6.85E-05 | 2.15779221 | 0.46343665 | 0.13684211 | 4 | 181.65      | 0.76844156 | 14406  | 0.14216915 |
| CZCD2     | 33 | 6.81E-05 | 2.09480519 | 0.47373168 | 0.05681818 | 4 | 195.03003   | 0.78033896 | 63212  | 0.14364651 |
| PSMD6     | 18 | 6.72E-05 | 2.11883117 | 0.45308774 | 0.2875817  | 4 | 149         | 0.75633777 | 11412  | 0.15769515 |
| HMGNA     | 35 | 6.70E-05 | 2.06298701 | 0.48473403 | 0.07236891 | 4 | 194.7428571 | 0.7874026  | 76788  | 0.16592861 |
| MBD4      | 44 | 6.68E-05 | 2.13246753 | 0.46894032 | 0.04016913 | 4 | 184.054546  | 0.77350649 | 97915  | 0.14342488 |
| ANKX3     | 24 | 6.68E-05 | 2.11688312 | 0.47239264 | 0.15217391 | 4 | 211.5       | 0.77662338 | 22398  | 0.15836454 |
| SLK       | 37 | 6.67E-05 | 2.06558442 | 0.48412449 | 0.08258258 | 4 | 215.1891892 | 0.78688312 | 71388  | 0.15365244 |
| ZZZ3      | 37 | 6.66E-05 | 2.05584416 | 0.48481819 | 0.0797958  | 4 | 219.945946  | 0.78883117 | 80246  | 0.15589598 |
| PTPRC     | 36 | 6.60E-05 | 2.06493506 | 0.48427673 | 0.0911174  | 4 | 209.1174    | 0.78701299 | 8174   | 0.14042152 |
| HEATR1    | 29 | 6.53E-05 | 2.14155844 | 0.46694967 | 0.08866995 | 4 | 169.7931035 | 0.77168831 | 40172  | 0.13126383 |
| ACSL      |    |          |            |            |            |   |             |            |        |            |

|          |    |          |            |              |             |   |              |            |       |            |
|----------|----|----------|------------|--------------|-------------|---|--------------|------------|-------|------------|
| TROVE2   | 32 | 5.63E-05 | 2.10649351 | 0.47472256   | 0.09475806  | 4 | 180.96875    | 0.7787013  | 47228 | 0.13462612 |
| FNBP4    | 35 | 5.62E-05 | 2.07857143 | 0.48109966   | 0.08739496  | 4 | 227.5714286  | 0.78428571 | 61164 | 0.16440958 |
| FBXO5    | 15 | 5.62E-05 | 2.34545455 | 0.42550559   | 0.12380952  | 4 | 148          | 0.73090909 | 11156 | 0.14839597 |
| ADGRG6   | 18 | 5.56E-05 | 2.28441558 | 0.423774872  | 0           | 4 | 165.3571429  | 0.74311688 | 53156 | 0.15593857 |
| DDOST    | 28 | 5.55E-05 | 2.12987013 | 0.4695122    | 0.08201058  | 4 | 190.1785714  | 0.77402597 | 32346 | 0.14500926 |
| RBMI2    | 29 | 5.51E-05 | 2.19545455 | 0.45548654   | 0.01231527  | 4 | 184.9310345  | 0.76090909 | 45772 | 0.15460783 |
| ABCC4    | 34 | 5.51E-05 | 2.07207792 | 0.48260733   | 0.08734403  | 4 | 226.1764706  | 0.78558442 | 60352 | 0.16239858 |
| AVI9     | 12 | 5.49E-05 | 2.18831169 | 0.45697729   | 0.10606061  | 4 | 249.3831333  | 0.76237766 | 15996 | 0.20175439 |
| PAL10    | 17 | 5.48E-05 | 2.0461039  | 0.48973174   | 0.12762763  | 3 | 213.8108108  | 0.79077922 | 67126 | 0.12737292 |
| SLC30A5  | 30 | 5.48E-05 | 2.08116883 | 0.48049922   | 0.12873563  | 4 | 200.9333333  | 0.78376623 | 32144 | 0.14505451 |
| CDK16    | 32 | 5.46E-05 | 2.18376623 | 0.45792447   | 0.02825281  | 4 | 157.375      | 0.76324675 | 43632 | 0.12964876 |
| TGFB1    | 34 | 5.45E-05 | 2.07207792 | 0.48260733   | 0.17825512  | 3 | 215.6470588  | 0.78558442 | 47488 | 0.15466755 |
| ECT2     | 33 | 5.41E-05 | 2.05649351 | 0.4862646    | 0.09059309  | 4 | 227.30090909 | 0.7887013  | 52648 | 0.16084575 |
| XPMPF1   | 29 | 5.40E-05 | 2.07373662 | 0.48230504   | 0.091133    | 4 | 238.2680666  | 0.78512468 | 45288 | 0.17085427 |
| TLR7     | 39 | 5.39E-05 | 2.13506494 | 0.46836083   | 0.02024291  | 4 | 203.7948718  | 0.77298701 | 72028 | 0.15937657 |
| TPBG     | 26 | 5.39E-05 | 2.1538961  | 0.46427495   | 0.08        | 4 | 189.3846154  | 0.76922078 | 40022 | 0.14858904 |
| NENF     | 21 | 5.36E-05 | 2.20909091 | 0.4526749    | 0.11904762  | 4 | 171.6666667  | 0.75818182 | 25284 | 0.14349427 |
| EXT2     | 35 | 5.36E-05 | 2.07597403 | 0.4817016    | 0.10338681  | 4 | 210          | 0.78480519 | 53994 | 0.15343502 |
| RP1      | 12 | 5.34E-05 | 2.19090909 | 0.45643154   | 0.07359307  | 4 | 169.3181818  | 0.76181818 | 16000 | 0.13837227 |
| PLS3     | 29 | 5.33E-05 | 2.10714286 | 0.47457627   | 0.0789163   | 4 | 200.7586207  | 0.77857143 | 47424 | 0.14955386 |
| CYP24A1  | 27 | 5.32E-05 | 2.11623377 | 0.47253759   | 0.12535613  | 4 | 200.4074074  | 0.77675325 | 34686 | 0.15028757 |
| BET1     | 33 | 5.32E-05 | 2.06948052 | 0.48321305   | 0.08901515  | 3 | 205.3030303  | 0.7861039  | 58448 | 0.14697838 |
| SLAMF8   | 12 | 5.31E-05 | 2.2461039  | 0.4552158    | 0.0604839   | 4 | 168.09175    | 0.75077922 | 56224 | 0.15064752 |
| STAT2    | 29 | 5.30E-05 | 2.2961039  | 0.43552036   | 0.05608801  | 4 | 240.77822    | 0.74077922 | 47950 | 0.14959167 |
| PROS1    | 29 | 5.29E-05 | 2.1025974  | 0.47560222   | 0.07635468  | 3 | 202.1724138  | 0.77948052 | 53378 | 0.14985163 |
| GOLIM4   | 24 | 5.27E-05 | 2.07467532 | 0.48200313   | 0.1557971   | 3 | 270.75       | 0.78506494 | 33534 | 0.19347153 |
| CYBSR4   | 18 | 5.21E-05 | 2.17402597 | 0.45997611   | 0.05882353  | 4 | 216.5555556  | 0.76519481 | 24442 | 0.17270146 |
| ARF3     | 29 | 5.19E-05 | 2.09545455 | 0.47722343   | 0.10334428  | 4 | 198.6208697  | 0.78090909 | 36652 | 0.14586578 |
| DOX5     | 29 | 5.18E-05 | 2.11298701 | 0.47326368   | 0.07569221  | 3 | 272.40224    | 0.10759231 | 51326 | 0.15350272 |
| PLEK     | 27 | 5.10E-05 | 2.15714286 | 0.46357616   | 0.04273504  | 4 | 184.8518159  | 0.76857143 | 49102 | 0.14660745 |
| PDIA4    | 19 | 5.10E-05 | 2.16233766 | 0.46246246   | 0.05879553  | 4 | 190.6842105  | 0.76753247 | 13688 | 0.15604726 |
| AP3B1    | 27 | 5.08E-05 | 2.07662338 | 0.48155097   | 0.08547009  | 4 | 229.8888889  | 0.78467532 | 43262 | 0.16513566 |
| ZNF277   | 26 | 5.07E-05 | 2.12467532 | 0.47066015   | 0.06769221  | 4 | 224.1153846  | 0.77506494 | 50038 | 0.18989511 |
| PLSCR1   | 25 | 5.04E-05 | 2.20714286 | 0.4730730343 | 0.193666667 | 4 | 219.6666667  | 0.75867143 | 20402 | 0.15897143 |
| TCF1     | 16 | 5.02E-05 | 2.15064935 | 0.46497585   | 0.20833333  | 4 | 207.9375     | 0.76987013 | 6962  | 0.16081787 |
| GURX3    | 26 | 5.01E-05 | 2.08571429 | 0.47945205   | 0.19076923  | 4 | 258.5384615  | 0.78285714 | 26646 | 0.18704776 |
| ARMCX3   | 31 | 4.99E-05 | 2.20714286 | 0.4530743    | 0.03870968  | 4 | 176.6129032  | 0.75857143 | 58414 | 0.14974215 |
| CASD1    | 31 | 4.95E-05 | 2.1298701  | 0.47326368   | 0.06246359  | 4 | 206.4516129  | 0.7774026  | 50742 | 0.15288799 |
| EFTCL1   | 34 | 4.95E-05 | 2.10584416 | 0.47486895   | 0.04417112  | 4 | 169.3181818  | 0.7788117  | 69954 | 0.15992167 |
| GNPTAB   | 33 | 4.95E-05 | 2.14285714 | 0.46666667   | 0.03030303  | 4 | 197.4844845  | 0.77142857 | 67042 | 0.1546073  |
| BMPR1A   | 34 | 4.95E-05 | 2.07207792 | 0.48260733   | 0.06773619  | 4 | 228.2647059  | 0.78558442 | 62968 | 0.16436236 |
| LCP2     | 22 | 4.95E-05 | 2.14220779 | 0.46680812   | 0.18181818  | 4 | 184.9090909  | 0.77155844 | 20076 | 0.15231887 |
| RAP2C    | 31 | 4.91E-05 | 2.1188317  | 0.47195832   | 0.0496237   | 4 | 215.8387097  | 0.78273377 | 61812 | 0.15384153 |
| MICAL2   | 22 | 4.90E-05 | 2.05519481 | 0.48657188   | 0.08712043  | 3 | 287.6666667  | 0.7812043  | 67000 | 0.16084909 |
| WDR61    | 10 | 4.88E-05 | 2.27857143 | 0.43887147   | 0.08888889  | 4 | 227.3        | 0.74428571 | 7784  | 0.20533937 |
| EGF      | 29 | 4.88E-05 | 2.13571429 | 0.46822742   | 0.04433498  | 4 | 201.5862069  | 0.77285714 | 38776 | 0.15558578 |
| GPC4     | 30 | 4.87E-05 | 2.16103896 | 0.46274038   | 0.05747126  | 4 | 188.1        | 0.76779221 | 46232 | 0.14976077 |
| CHRNA3   | 34 | 4.86E-05 | 2.16103896 | 0.46274038   | 0.03971569  | 4 | 217.9705882  | 0.76779221 | 40466 | 0.14238879 |
| UREC1    | 25 | 4.84E-05 | 2.10909091 | 0.474117793  | 0.09        | 4 | 210.52       | 0.77181818 | 36476 | 0.15699151 |
| ATXN10   | 35 | 4.84E-05 | 2.06753247 | 0.48366834   | 0.1092437   | 3 | 230.4571429  | 0.78649351 | 58600 | 0.16468906 |
| PCMT02   | 27 | 4.84E-05 | 2.14155844 | 0.46694967   | 0.03703704  | 4 | 193.0740741  | 0.77168831 | 41242 | 0.14978976 |
| MGEA5    | 37 | 4.83E-05 | 2.05779221 | 0.4859572    | 0.12162162  | 4 | 226.5405405  | 0.78844156 | 50280 | 0.16019343 |
| DNAC10   | 37 | 4.82E-05 | 2.10194805 | 0.47577495   | 0.0985057   | 3 | 188.7666667  | 0.77961039 | 39360 | 0.13946113 |
| ITGAM1   | 20 | 4.78E-05 | 2.12207792 | 0.47326368   | 0.08421053  | 4 | 215.6566667  | 0.7758442  | 24466 | 0.15956399 |
| EED      | 29 | 4.76E-05 | 2.07597403 | 0.4817016    | 0.12068966  | 4 | 223.862069   | 0.78480519 | 45382 | 0.16083691 |
| APOBEC3B | 16 | 4.75E-05 | 2.21818182 | 0.45081967   | 0.18333333  | 4 | 182.125      | 0.75636364 | 13272 | 0.15325126 |
| XBP1     | 31 | 4.73E-05 | 2.09025974 | 0.47840944   | 0.13333333  | 4 | 200.7677419  | 0.78194805 | 41696 | 0.16114915 |
| SKCHD1   | 34 | 4.72E-05 | 2.11558442 | 0.47286263   | 0.04098622  | 4 | 194.4252594  | 0.77688312 | 53066 | 0.14699798 |
| ANRHD10  | 16 | 4.72E-05 | 2.04220779 | 0.48966514   | 0.149266667 | 4 | 185.6166667  | 0.79155844 | 20926 | 0.15092366 |
| MTMR4    | 35 | 4.69E-05 | 2.06948052 | 0.48321305   | 0.09915966  | 4 | 220.1428571  | 0.7861039  | 50202 | 0.15763406 |
| TUBA1B   | 18 | 4.67E-05 | 2.16883117 | 0.46107784   | 0.23222222  | 4 | 233.2222222  | 0.76623377 | 14584 | 0.18465734 |
| LOXL1    | 19 | 4.65E-05 | 2.12662338 | 0.47022901   | 0.14619883  | 4 | 246.8421053  | 0.77467532 | 16556 | 0.18607605 |
| ARPC3    | 19 | 4.64E-05 | 2.12142857 | 0.47178007   | 0.19298246  | 4 | 213.315795   | 0.77571429 | 11876 | 0.17336069 |
| FNIA     | 23 | 4.56E-05 | 2.12373662 | 0.47304801   | 0.06666667  | 3 | 273.22468    | 0.77324675 | 28110 | 0.15362744 |
| TNMEM24B | 26 | 4.55E-05 | 2.31883117 | 0.43125175   | 0           | 4 | 163.9615835  | 0.73623377 | 43004 | 0.16166819 |
| EOGT     | 22 | 4.54E-05 | 2.39805195 | 0.41700514   | 0           | 4 | 137.5454546  | 0.72038961 | 39398 | 0.15104586 |
| MATN2    | 30 | 4.52E-05 | 2.11493506 | 0.48272776   | 0.05287376  | 4 | 208.4666667  | 0.77701299 | 43286 | 0.15708176 |
| DRE1     | 33 | 4.52E-05 | 2.07727727 | 0.48465614   | 0.12121212  | 4 | 221.0060606  | 0.7854555  | 50262 | 0.15892787 |
| OC42     | 32 | 4.47E-05 | 2.26168831 | 0.44214757   | 0.0358772   | 4 | 185.616632   | 0.74766232 | 32434 | 0.14297423 |
| PRPF18   | 25 | 4.43E-05 | 2.11688312 | 0.47239264   | 0.08666667  | 4 | 210.28       | 0.77662338 | 43352 | 0.15783621 |
| TAC1     | 15 | 4.40E-05 | 2.27077922 | 0.44037747   | 0.11428571  | 4 | 179.8        | 0.74584416 | 13932 | 0.16224029 |
| COBP1    | 21 | 4.40E-05 | 2.12727273 | 0.47008547   | 0.14285714  | 4 | 216.2857143  | 0.77454545 | 17612 | 0.16379563 |
| PAPC3    | 28 | 4.39E-05 | 2.0841558  | 0.47370508   | 0.11640212  | 4 | 195.1785714  | 0.78311688 | 30448 | 0.14117738 |
| ZNF292   | 26 | 4.38E-05 | 2.12857143 | 0.46979866   | 0.08        | 4 | 252.3692308  | 0.77428571 | 41254 | 0.16464009 |
| PRMT3    | 29 | 4.31E-05 | 2.07207792 | 0.48260733   | 0.13054187  | 3 | 246.9655172  | 0.78558442 | 48684 | 0.17660698 |
| TRAM1    | 33 | 4.28E-05 | 2.07857143 | 0.48109966   | 0.10795455  | 4 | 217.6363636  | 0.78428571 | 47604 | 0.15727777 |
| SLC39A6  | 31 | 4.28E-05 | 2.09220779 | 0.477964     | 0.10332281  | 4 | 219          | 0.78155844 | 44204 | 0.16034503 |
| NARX4S   | 28 | 4.27E-05 | 2.1012987  | 0.47589617   | 0.0634296   | 4 | 210.1428571  | 0.77974026 | 38956 | 0.15527261 |
| DOT3     | 23 | 4.24E-05 | 2.09350449 | 0.477467749  | 0.10769211  | 4 | 213.6153846  | 0.7712987  | 32770 | 0.15169718 |
| WIP1     | 20 | 4.24E-05 | 2.14025974 | 0.46723301   | 0.15789474  | 4 | 200.8        | 0.77194805 | 15690 | 0.15391104 |
| PDIA6    | 23 | 4.22E-05 | 2.10584416 | 0.47486895   | 0.1541502   | 4 | 208.2680666  | 0.77883117 | 30242 | 0.15386099 |
| BARRE51  | 33 | 4.22E-05 | 2.06623377 | 0.48397234   | 0.125       | 4 | 223.8484848  | 0.78675325 | 46078 | 0.15920945 |
| DNM5     | 29 | 4.20E-05 | 2.09525714 | 0.4778157    | 0.08374394  | 4 | 220.241793   | 0.78142857 | 47124 | 0.16173935 |
| SNR107   | 22 | 4.18E-05 | 2.1538961  | 0.46427495   | 0.0413935   | 4 | 186.9375     | 0.76922078 | 52238 | 0.16083691 |
| CNM3     | 31 | 4.17E-05 | 2.08311688 | 0.48004988   | 0.07526882  | 3 | 239.9032258  | 0.78337662 | 59444 | 0.17464497 |
| TRPC1    | 29 | 4.14E-05 | 2.08571429 | 0.47945205   | 0.12561576  | 4 | 208.5172414  | 0.78285714 | 35906 | 0.15126871 |
| HABP2    | 31 | 4.14E-05 | 2.10974026 | 0.4739981    | 0.08172043  | 4 | 219.7096777  | 0.77805195 | 51438 | 0.16423164 |
| PRN      | 24 | 4.13E-05 | 2.12373662 | 0.47094802   | 0.10567197  | 4 | 195.8333333  | 0.77532468 | 21448 | 0.1470044  |
| PRCC     | 15 | 4.12E-05 | 2.15194805 | 0.46469123   | 0.13333333  | 3 | 7696.1039    | 0.78311688 | 16926 | 0.15901563 |
| BPTF     | 30 | 4.12E-05 | 2.10844156 | 0.47428395   | 0.          |   |              |            |       |            |

|          |      |          |            |            |               |   |             |            |       |            |
|----------|------|----------|------------|------------|---------------|---|-------------|------------|-------|------------|
| AVP11    | 26   | 3.31E-05 | 2.08766234 | 0.47900467 | 0.16923077    | 3 | 249.2692308 | 0.78246753 | 32008 | 0.18096754 |
| NBRF2    | 20   | 3.28E-05 | 2.15649351 | 0.46371575 | 0.06842055    | 4 | 244.45      | 0.7687013  | 35576 | 0.19163934 |
| KANSL1L  | 30   | 3.28E-05 | 2.26038961 | 0.44240161 | 0.00229885    | 4 | 179.6333333 | 0.74792208 | 51390 | 0.16409595 |
| LAMB1    | 21   | 3.26E-05 | 2.12280713 | 0.46951122 | 0.05714286    | 3 | 217.620297  | 0.77402597 | 39268 | 0.17276823 |
| SEL1L3   | 24   | 3.22E-05 | 2.15909091 | 0.46315789 | 0.09057971    | 4 | 173.75      | 0.76818182 | 28934 | 0.13693765 |
| RAB11FP3 | 21   | 3.22E-05 | 2.12727273 | 0.47008547 | 0.09047619    | 4 | 224.2857143 | 0.77454545 | 29210 | 0.16945614 |
| WDR44    | 26   | 3.20E-05 | 2.09480519 | 0.47737136 | 0.1386154     | 3 | 237.7307692 | 0.78103896 | 25032 | 0.16363739 |
| DCD7     | 18   | 3.20E-05 | 2.11792208 | 0.46994202 | 0.09150327    | 4 | 254         | 0.77441558 | 24202 | 0.15919201 |
| TCF1     | 26   | 3.15E-05 | 2.20844156 | 0.43119369 | 0.04119369    | 4 | 168.576931  | 0.73811169 | 36482 | 0.16301257 |
| CLDND1   | 26   | 3.13E-05 | 2.11688312 | 0.47239264 | 0.05538462    | 4 | 203.6153846 | 0.77662338 | 33464 | 0.15329505 |
| MS4AAA   | 16   | 3.13E-05 | 2.17792208 | 0.45915125 | 0.09166667    | 4 | 212.125     | 0.76441558 | 15022 | 0.16958567 |
| MDAC1    | 26   | 3.12E-05 | 2.09805195 | 0.47663262 | 0.14133846    | 4 | 216.3846154 | 0.78038961 | 21990 | 0.15861155 |
| MOXD1    | 26   | 3.11E-05 | 2.08051948 | 0.48064919 | 0.12307692    | 4 | 235.8846154 | 0.7838961  | 36262 | 0.16955151 |
| ZFAND1   | 22   | 3.10E-05 | 2.27272727 | 0.43921176 | 0.004329      | 4 | 174.818182  | 0.74654545 | 35752 | 0.16073737 |
| CDL213   | 19   | 3.09E-05 | 2.14350649 | 0.4665253  | 0.11111111    | 4 | 226.7894737 | 0.7712987  | 19426 | 0.17446619 |
| BLNK     | 17   | 3.09E-05 | 2.15064935 | 0.46497585 | 0.11764706    | 3 | 216.2352941 | 0.76987013 | 14068 | 0.16783217 |
| RG51     | 24   | 3.08E-05 | 2.11038961 | 0.47384615 | 0.13043478    | 4 | 250.25      | 0.77792208 | 33496 | 0.18585934 |
| NNMT     | 16   | 3.07E-05 | 2.17377662 | 0.48011253 | 0.125         | 4 | 248.8125    | 0.76532468 | 17614 | 0.19816587 |
| MNS1     | 21   | 3.02E-05 | 2.09090909 | 0.47262687 | 0.15714286    | 4 | 250.3809524 | 0.78181818 | 21250 | 0.18162949 |
| FBLN5    | 16   | 3.02E-05 | 2.27532468 | 0.43494772 | 0.05          | 4 | 168.9375    | 0.74493506 | 17230 | 0.15226965 |
| GRAM03   | 22   | 3.01E-05 | 2.13311688 | 0.46879756 | 0.15584416    | 3 | 237.6818182 | 0.77337662 | 25614 | 0.18133241 |
| ZNF200   | 27   | 3.00E-05 | 2.16428571 | 0.46240402 | 0.10943032    | 4 | 201.6666667 | 0.76714286 | 44996 | 0.16167575 |
| CKAP7    | 23   | 2.99E-05 | 2.1512987  | 0.4648355  | 0.0513834     | 4 | 216.6080957 | 0.76974026 | 35556 | 0.16912821 |
| URA      | 29   | 2.98E-05 | 2.16168831 | 0.46260138 | 0.0348276     | 4 | 210.37391   | 0.76760234 | 46454 | 0.16367603 |
| IL1ORA   | 23   | 2.98E-05 | 2.11363636 | 0.47131828 | 0.12252964    | 4 | 229.3043478 | 0.77772727 | 31378 | 0.17102531 |
| EPB412   | 25   | 2.93E-05 | 2.08246753 | 0.48019956 | 0.17333333    | 4 | 233.64      | 0.78350649 | 30930 | 0.16829971 |
| ARPC1A   | 17   | 2.89E-05 | 2.27597403 | 0.43937233 | 0.16911765    | 4 | 171.1764706 | 0.74480519 | 11156 | 0.15534759 |
| TASPL    | 18   | 2.88E-05 | 2.15454545 | 0.46413502 | 0.05882353    | 4 | 221.6111111 | 0.76909091 | 21752 | 0.17278688 |
| PRR4     | 22   | 2.83E-05 | 2.2025974  | 0.43429216 | 0.10846667    | 4 | 188.1166667 | 0.73948052 | 5796  | 0.16985669 |
| UGCG     | 23   | 2.82E-05 | 2.1025974  | 0.47560222 | 0.13043478    | 4 | 250.826087  | 0.77948052 | 26878 | 0.18463853 |
| COL2     | 17   | 2.77E-05 | 2.105      | 0.46511628 | 0.20588235    | 4 | 221.5882353 | 0.77       | 14326 | 0.16373703 |
| ST13     | 21   | 2.76E-05 | 2.1487013  | 0.4653974  | 0.17412857    | 4 | 209.4761905 | 0.77025974 | 20000 | 0.16275709 |
| MYCL1    | 25   | 2.75E-05 | 2.3538961  | 0.42482759 | 0             | 4 | 170.64      | 0.7657143  | 39766 | 0.17561077 |
| AT2C1    | 23   | 2.74E-05 | 2.12346753 | 0.46894903 | 0.10846667    | 4 | 217.57      | 0.77350649 | 34804 | 0.15360485 |
| VCAM1    | 23   | 2.74E-05 | 2.11623377 | 0.47253759 | 0.11462451    | 4 | 216.826087  | 0.77675325 | 24766 | 0.16193136 |
| SRP22    | 26   | 2.74E-05 | 2.11038961 | 0.47384615 | 0.11692308    | 4 | 227.0384615 | 0.77792208 | 31564 | 0.16896729 |
| TGIF1    | 27   | 2.73E-05 | 2.07922078 | 0.48094941 | 0.2022792     | 3 | 256.6666667 | 0.78415584 | 23974 | 0.18451953 |
| IFNGAP3  | 18   | 2.70E-05 | 2.15734286 | 0.46357516 | 0.14379085    | 4 | 217.5       | 0.76857143 | 11508 | 0.16992442 |
| FAPB5    | 23   | 2.69E-05 | 2.12727272 | 0.47109208 | 0.1           | 4 | 177.545454  | 0.77454545 | 2958  | 0.16767419 |
| SRGN     | 22   | 2.68E-05 | 2.10194805 | 0.47574915 | 0.07359307    | 3 | 221.5       | 0.77961039 | 28106 | 0.16326736 |
| PSMCG    | 14   | 2.66E-05 | 2.2487013  | 0.36263736 | 0.170.2857143 | 3 | 210.2857143 | 0.75025974 | 3312  | 0.14878871 |
| CD9      | 25   | 2.65E-05 | 2.08311688 | 0.48004988 | 0.2           | 4 | 271.28      | 0.78337662 | 25688 | 0.195671   |
| RNF219   | 20   | 2.65E-05 | 2.1920779  | 0.45616114 | 0.13684211    | 4 | 190.75      | 0.76155844 | 29466 | 0.15671888 |
| CD9      | 26   | 2.63E-05 | 2.08636364 | 0.47303083 | 0.12666667    | 4 | 186.2222222 | 0.76272727 | 28102 | 0.16762217 |
| GMDS     | 22   | 2.63E-05 | 2.10064935 | 0.47604328 | 0.1254113     | 4 | 257.3181818 | 0.77987013 | 30212 | 0.18907086 |
| FHL1     | 18   | 2.63E-05 | 2.22402597 | 0.44963504 | 0.08496732    | 4 | 169.4444444 | 0.75519481 | 15010 | 0.14401891 |
| ABC81    | 17   | 2.60E-05 | 2.14675325 | 0.46581972 | 0.125         | 4 | 238.8235294 | 0.77064935 | 18626 | 0.18394161 |
| CEP57    | 21   | 2.58E-05 | 2.12727273 | 0.4708547  | 0.10952381    | 4 | 233.1428571 | 0.77454545 | 25756 | 0.16873941 |
| OCT1     | 20   | 2.58E-05 | 2.09805195 | 0.47613262 | 0.13684211    | 3 | 256.1       | 0.78038961 | 21964 | 0.17798535 |
| LAMP3    | 27   | 2.57E-05 | 2.15519481 | 0.46399518 | 0.06267806    | 4 | 206.148182  | 0.76896104 | 35026 | 0.16208807 |
| CX3CR1   | 24   | 2.56E-05 | 2.14935065 | 0.4652568  | 0.10144928    | 4 | 202.5833333 | 0.77012987 | 26818 | 0.15755512 |
| MARK3K1  | 22   | 2.55E-05 | 2.11298701 | 0.47326368 | 0.12554113    | 4 | 256.6818182 | 0.7774026  | 33206 | 0.19127517 |
| PSMB1    | 12   | 2.52E-05 | 2.48056494 | 0.40240397 | 0.1969097     | 4 | 103.0833333 | 0.70298701 | 35020 | 0.13055909 |
| SHMARCA1 | 19   | 2.50E-05 | 2.13374429 | 0.46822742 | 0.13854597    | 4 | 172.857143  | 0.73851669 | 14334 | 0.16985669 |
| MP2L2    | 26   | 2.50E-05 | 2.13376623 | 0.4686549  | 0.11384615    | 4 | 208.5       | 0.77324675 | 30130 | 0.15934486 |
| EV2A     | 23   | 2.48E-05 | 2.16493506 | 0.46190762 | 0.08303995    | 4 | 202.213913  | 0.76701299 | 28850 | 0.16035197 |
| ZNF451   | 20   | 2.47E-05 | 2.13116883 | 0.46922608 | 0.06842055    | 4 | 219.85      | 0.77376623 | 22398 | 0.16695917 |
| GNL3     | 13   | 2.46E-05 | 2.22807013 | 0.44845661 | 0.12794872    | 4 | 197.846539  | 0.75025974 | 33886 | 0.16868111 |
| FGF13    | 22   | 2.39E-05 | 2.1461029  | 0.46596067 | 0.10846667    | 4 | 250.818182  | 0.77077922 | 28496 | 0.17008457 |
| ZC3H7A   | 24   | 2.39E-05 | 2.09415584 | 0.47751938 | 0.07246377    | 4 | 267.5       | 0.78116883 | 24776 | 0.19550511 |
| STXBP3   | 21   | 2.39E-05 | 2.11948052 | 0.48571429 | 0.08571429    | 4 | 244.4761905 | 0.7761039  | 28322 | 0.18346392 |
| TNMF57   | 19   | 2.39E-05 | 2.12337662 | 0.47094801 | 0.12280702    | 4 | 254.205263  | 0.77532468 | 22498 | 0.19116075 |
| TMX4     | 26   | 2.38E-05 | 2.12012987 | 0.47166922 | 0.12615385    | 4 | 226.0769231 | 0.77597403 | 31636 | 0.17037399 |
| CHI      | 23   | 2.35E-05 | 2.14644444 | 0.48444444 | 0.03809524    | 4 | 199.1333333 | 0.73809524 | 914   | 0.16157117 |
| TRIM22   | 22   | 2.33E-05 | 2.15649351 | 0.46371575 | 0.06060606    | 4 | 209.7272727 | 0.7687013  | 25208 | 0.16440702 |
| NEU1     | 15   | 2.33E-05 | 2.22727273 | 0.44897959 | 0.180.2666667 | 4 | 180.2666667 | 0.75454545 | 13724 | 0.15367521 |
| ITGB2    | 20   | 2.31E-05 | 2.13311688 | 0.46879756 | 0.17368421    | 4 | 237.35      | 0.7737662  | 18858 | 0.18045627 |
| PAPPA2   | 25   | 2.30E-05 | 2.15194805 | 0.4697953  | 0.10333333    | 4 | 208.2       | 0.76961039 | 23502 | 0.16288475 |
| NUP1051  | 24   | 2.29E-05 | 2.18896104 | 0.45483773 | 0.11978012    | 4 | 173.2142857 | 0.76135219 | 5318  | 0.17502427 |
| TNMF131  | 24   | 2.29E-05 | 2.07337662 | 0.48230504 | 0.14492754    | 3 | 280.9583333 | 0.78532468 | 20312 | 0.20025541 |
| GPER1    | 16   | 2.28E-05 | 2.41363636 | 0.41431262 | 0.150.3125    | 4 | 150.3125    | 0.71727273 | 18282 | 0.16776685 |
| PSMB9    | 14   | 2.28E-05 | 2.33311688 | 0.42861111 | 0.15384615    | 4 | 126.6428571 | 0.73337662 | 3592  | 0.12468301 |
| SEC24D   | 19   | 2.26E-05 | 2.12524468 | 0.47051353 | 0.14619883    | 4 | 236.3684211 | 0.77493506 | 11850 | 0.17804307 |
| DCARF    | 20   | 2.25E-05 | 2.12441558 | 0.46851232 | 0.12631529    | 4 | 195.35      | 0.77311688 | 22734 | 0.16710025 |
| AGA      | 17   | 2.22E-05 | 2.24025974 | 0.44637681 | 0.01470588    | 4 | 186.4750882 | 0.75194805 | 20890 | 0.16157272 |
| CXCL6    | 20   | 2.20E-05 | 2.19155844 | 0.4562963  | 0.13157895    | 4 | 200.45      | 0.76168831 | 18232 | 0.1634584  |
| ARF4     | 22   | 2.19E-05 | 2.12922078 | 0.4696535  | 0.06060606    | 4 | 226.0454546 | 0.77415584 | 29598 | 0.17146407 |
| IRM      | 16   | 2.18E-05 | 2.25194805 | 0.4405998  | 0.09166667    | 4 | 171.9375    | 0.74961039 | 15710 | 0.1533448  |
| CD24     | 23   | 2.18E-05 | 2.2974026  | 0.47527417 | 0.1310719     | 4 | 173.944444  | 0.77107714 | 19008 | 0.16157117 |
| ALG6     | 25   | 2.17E-05 | 2.10194805 | 0.47574915 | 0.13333333    | 4 | 241.88      | 0.77961039 | 29118 | 0.17828909 |
| EIF3M    | 21   | 2.17E-05 | 2.19090909 | 0.45643154 | 0.08088235    | 4 | 222         | 0.76181818 | 13802 | 0.18074801 |
| DENNDC4  | 21   | 2.16E-05 | 2.25454545 | 0.44354839 | 0.10940762    | 4 | 174.2857143 | 0.74909091 | 21164 | 0.15548728 |
| TAF1A    | 16   | 2.14E-05 | 2.13311688 | 0.46879756 | 0.15          | 4 | 260.75      | 0.7737662  | 10830 | 0.17574729 |
| RAB21A   | 19   | 2.13E-05 | 2.15909091 | 0.46435789 | 0.1254386     | 4 | 193.847684  | 0.76818182 | 23734 | 0.16157117 |
| CDH11    | 17   | 2.12E-05 | 2.16623377 | 0.4616307  | 0.13970588    | 3 | 215.5294118 | 0.76675325 | 18224 | 0.17046248 |
| HNRNPAB  | 13   | 2.11E-05 | 2.31233766 | 0.43246279 | 0.15151515    | 4 | 154.5       | 0.7375247  | 7152  | 0.17045028 |
| ANKA2P2  | 6    | 2.10E-05 | 2.42532468 | 0.41231593 | 0             | 4 | 220.3333333 | 0.74193506 | 4022  | 0.24942422 |
| CLCN3    | 23   | 2.10E-05 | 2.0993905  | 0.4697953  | 0.18181818    | 4 | 248.7931904 | 0.78012987 | 22418 | 0.18243006 |
| ZNF131   | 19   | 2.10E-05 | 2.17532478 | 0.47224778 | 0.17909094    | 4 | 213.684105  | 0.77449514 | 17702 | 0.17276773 |
| TYRPI    | 22   | 2.08E-05 | 2.18116883 | 0.45846078 | 0.04761905    | 4 | 196.3636364 | 0.76376623 | 22454 | 0.15879623 |
| FCGR3B   | 19</ |          |            |            |               |   |             |            |       |            |

|           |    |          |            |            |            |   |             |            |       |            |
|-----------|----|----------|------------|------------|------------|---|-------------|------------|-------|------------|
| COL1A2    | 17 | 1.58E-05 | 2.17727273 | 0.45929019 | 0.14705882 | 4 | 199.3529412 | 0.76454545 | 12140 | 0.15943529 |
| DCK       | 17 | 1.53E-05 | 2.14415584 | 0.46638401 | 0.06617647 | 4 | 269.8823529 | 0.77116883 | 19330 | 0.20792484 |
| PCGF2     | 13 | 1.48E-05 | 2.2524675  | 0.46638403 | 0.04610256 | 4 | 221.6923077 | 0.74955065 | 12334 | 0.19422246 |
| CCCL1     | 18 | 1.46E-05 | 2.16753247 | 0.46135141 | 0.13775491 | 4 | 264.8333333 | 0.76649951 | 16356 | 0.13732142 |
| CSTF3     | 20 | 1.45E-05 | 2.22402597 | 0.44893504 | 0.05789474 | 4 | 191.75      | 0.75519481 | 17824 | 0.16270178 |
| PAIP1     | 16 | 1.41E-05 | 2.24480519 | 0.44547295 | 0.05       | 4 | 198.5625    | 0.75103896 | 14210 | 0.17313156 |
| TSPAN1    | 17 | 1.41E-05 | 2.16231766 | 0.46246246 | 0.05882353 | 4 | 238.7058824 | 0.76753247 | 17694 | 0.1875781  |
| COIL      | 12 | 1.41E-05 | 2.31493506 | 0.43197756 | 0.07575758 | 4 | 184.3333333 | 0.73701299 | 8772  | 0.15722969 |
| TLR1      | 15 | 1.39E-05 | 2.22142857 | 0.45160777 | 0.15138095 | 4 | 177.6666667 | 0.75717429 | 8722  | 0.19265137 |
| COL3A1    | 16 | 1.39E-05 | 2.29415584 | 0.43589018 | 0.15       | 4 | 172.625     | 0.74116883 | 8650  | 0.16067272 |
| H53ST1    | 19 | 1.39E-05 | 2.1461039  | 0.46596067 | 0.0877193  | 4 | 249         | 0.77077922 | 20298 | 0.19241259 |
| SRR       | 16 | 1.37E-05 | 2.20974026 | 0.45254187 | 0.08333333 | 4 | 191.625     | 0.75805195 | 13792 | 0.19595092 |
| USO1      | 21 | 1.37E-05 | 2.11623177 | 0.47253759 | 0.07575758 | 4 | 255.952381  | 0.77675325 | 15866 | 0.19161848 |
| KRT1      | 16 | 1.36E-05 | 2.24155844 | 0.46611819 | 0.05833333 | 4 | 196.8875    | 0.75168831 | 15454 | 0.17128821 |
| UBO       | 11 | 1.36E-05 | 2.33961039 | 0.42742159 | 0.09090909 | 4 | 167.7272727 | 0.73207792 | 3500  | 0.16627508 |
| GONT3     | 16 | 1.33E-05 | 2.12662338 | 0.47022901 | 0.11666667 | 3 | 232.0625    | 0.74667532 | 13088 | 0.17478335 |
| HUA-G     | 10 | 1.32E-05 | 2.3025974  | 0.43429216 | 0.13333333 | 4 | 212.9       | 0.73948052 | 2666  | 0.19951573 |
| HMGN1     | 16 | 1.32E-05 | 2.14480519 | 0.46624281 | 0.16666667 | 3 | 222.1875    | 0.77103896 | 8624  | 0.17086538 |
| SEIL      | 16 | 1.31E-05 | 2.21688312 | 0.45110817 | 0.09166667 | 4 | 201.5625    | 0.75623232 | 12414 | 0.16893876 |
| TSPAN13   | 12 | 1.31E-05 | 2.4512987  | 0.40794702 | 0.0        | 4 | 149.8333333 | 0.70974026 | 12528 | 0.17448222 |
| IBTK      | 14 | 1.31E-05 | 2.28311688 | 0.43799772 | 0.02197802 | 4 | 201.4285714 | 0.74337662 | 14710 | 0.18499013 |
| QTRT2     | 14 | 1.30E-05 | 2.41883117 | 0.41342282 | 0          | 4 | 171.7142857 | 0.71623377 | 13096 | 0.1991573  |
| ABCA4     | 12 | 1.28E-05 | 2.25519481 | 0.44342067 | 0.13636364 | 4 | 215.0813333 | 0.74896104 | 7170  | 0.18755389 |
| CYP3A7    | 16 | 1.26E-05 | 2.18831169 | 0.45697329 | 0.07619048 | 4 | 244.6666667 | 0.74616667 | 11466 | 0.19482995 |
| CLEC2B    | 18 | 1.24E-05 | 2.20064935 | 0.45441133 | 0.09803922 | 4 | 192.6666667 | 0.75987013 | 13124 | 0.15874324 |
| BTD       | 15 | 1.24E-05 | 2.17987013 | 0.45874293 | 0.15238095 | 4 | 244.1333333 | 0.76402597 | 10662 | 0.19551282 |
| FAM149A   | 13 | 1.23E-05 | 2.16753247 | 0.4613541  | 0.07692308 | 4 | 279.1538462 | 0.76649351 | 12718 | 0.22037093 |
| NUDT3     | 20 | 1.21E-05 | 2.10212987 | 0.47589517 | 0.05789474 | 4 | 281.75      | 0.77974026 | 14396 | 0.19175824 |
| LAMP      | 19 | 1.20E-05 | 2.17153247 | 0.47224778 | 0.19883041 | 3 | 276.8421053 | 0.77495194 | 12332 | 0.22547671 |
| SNK3      | 17 | 1.19E-05 | 2.13181818 | 0.46908316 | 0.11764706 | 4 | 240.7647059 | 0.77363636 | 11606 | 0.18228361 |
| DSE       | 15 | 1.18E-05 | 2.17402597 | 0.45997611 | 0.18095238 | 4 | 242.7333333 | 0.75519481 | 12068 | 0.19309799 |
| GSPT2     | 9  | 1.18E-05 | 2.31753247 | 0.43149342 | 0.13888889 | 4 | 212.8888889 | 0.73649351 | 3206  | 0.20418401 |
| CCNI      | 14 | 1.16E-05 | 2.17521468 | 0.45970148 | 0.18681319 | 4 | 279.7142857 | 0.76493506 | 8906  | 0.22279162 |
| PPP2R3C   | 13 | 1.14E-05 | 2.22077912 | 0.45029204 | 0.09090909 | 4 | 256.8888889 | 0.74861539 | 9745  | 0.20584245 |
| IFI44     | 13 | 1.13E-05 | 2.21818182 | 0.45081967 | 0.08974359 | 4 | 230.3846154 | 0.75636364 | 8632  | 0.19360269 |
| DHX29     | 9  | 1.13E-05 | 2.33376623 | 0.42849193 | 0.11111111 | 4 | 214.6666667 | 0.73324675 | 3208  | 0.20981608 |
| TFRP2     | 14 | 1.10E-05 | 2.23181818 | 0.44806517 | 0.17582418 | 4 | 230.3571429 | 0.75363636 | 7556  | 0.17398483 |
| PKNO5     | 17 | 1.09E-05 | 2.18996104 | 0.45683773 | 0.08088235 | 4 | 225.7647059 | 0.76220779 | 11384 | 0.18325508 |
| GLD4      | 12 | 1.08E-05 | 2.26818182 | 0.44088176 | 0.14088176 | 4 | 247.6363636 | 0.74636364 | 8720  | 0.19639565 |
| ATPSD     | 11 | 1.07E-05 | 2.2961039  | 0.43552036 | 0.12727273 | 4 | 199.4545455 | 0.74077922 | 7224  | 0.18563077 |
| SERPINF2  | 8  | 1.06E-05 | 2.34350649 | 0.426711   | 0.03571429 | 4 | 247         | 0.7312987  | 4668  | 0.24625    |
| MOB1A     | 17 | 1.06E-05 | 2.3038961  | 0.43404703 | 0.0441765  | 4 | 193.2352941 | 0.73922078 | 10984 | 0.18832353 |
| BAG2      | 14 | 1.05E-05 | 2.32467532 | 0.43041676 | 0.02197802 | 4 | 190.787143  | 0.73506494 | 8078  | 0.1855568  |
| EP7       | 13 | 1.05E-05 | 2.2987013  | 0.43502025 | 0.05410256 | 4 | 234.7693208 | 0.74025971 | 1200  | 0.22954767 |
| HOPX      | 16 | 1.05E-05 | 2.16168831 | 0.46260138 | 0.11666667 | 3 | 255.1875    | 0.76766234 | 13318 | 0.20608889 |
| BRD7      | 14 | 1.04E-05 | 2.18441558 | 0.45778835 | 0.04395604 | 4 | 267.5714286 | 0.76311688 | 9592  | 0.21601942 |
| FLII      | 10 | 1.03E-05 | 2.35324675 | 0.4249481  | 0.04444444 | 4 | 175.2       | 0.72935065 | 5308  | 0.1733874  |
| WNT10B    | 16 | 1.03E-05 | 2.1987013  | 0.45481394 | 0.05       | 4 | 232.4375    | 0.76025974 | 11684 | 0.19309506 |
| MYMP      | 13 | 1.01E-05 | 2.2474026  | 0.4449581  | 0.0410256  | 4 | 234.7693208 | 0.75051948 | 8558  | 0.20174718 |
| AGR2      | 13 | 1.01E-05 | 2.18376623 | 0.45792447 | 0.11538462 | 4 | 258.3846154 | 0.76324675 | 9858  | 0.20795884 |
| EV12B     | 13 | 1.00E-05 | 2.21038961 | 0.45240893 | 0.12820513 | 4 | 225.2307692 | 0.75792208 | 9394  | 0.18709636 |
| SPPI      | 16 | 1.00E-05 | 2.25844156 | 0.44278321 | 0.10909091 | 4 | 240.7272727 | 0.74831169 | 6118  | 0.18085278 |
| PSTN14    | 13 | 9.97E-06 | 2.13896104 | 0.46665373 | 0.01282051 | 4 | 212.4615385 | 0.75220779 | 11136 | 0.18317555 |
| FAM60A    | 19 | 9.95E-06 | 2.29025974 | 0.45665685 | 0.06363636 | 4 | 222.3636364 | 0.76180364 | 9480  | 0.20680236 |
| QRICH1    | 14 | 9.93E-06 | 2.17792208 | 0.45951525 | 0.07692308 | 4 | 286.4285714 | 0.76441558 | 11636 | 0.2283092  |
| KIAA0430  | 13 | 9.93E-06 | 2.22922078 | 0.44858724 | 0.03846154 | 4 | 251.8461539 | 0.75415584 | 10482 | 0.21521324 |
| HUA-B     | 9  | 9.49E-06 | 2.37727273 | 0.4206501  | 0.19444444 | 4 | 168.3333333 | 0.72454545 | 1892  | 0.17682073 |
| VLDLR     | 15 | 9.32E-06 | 2.26818182 | 0.44088176 | 0.02857143 | 4 | 197.3333333 | 0.74863684 | 9014  | 0.17807971 |
| MIND4     | 14 | 9.32E-06 | 2.22467532 | 0.44950179 | 0.05924047 | 4 | 214.8571    | 0.75505994 | 11544 | 0.20092922 |
| PON2      | 9  | 9.31E-06 | 2.31753247 | 0.43149342 | 0.13888889 | 4 | 210.7777778 | 0.73649351 | 4132  | 0.2017684  |
| COL15A1   | 17 | 9.23E-06 | 2.26623377 | 0.44126074 | 0.05147059 | 4 | 205.4705882 | 0.74675325 | 13984 | 0.18479818 |
| PALB2     | 11 | 9.21E-06 | 2.23060494 | 0.44741429 | 0.17272727 | 4 | 265.363636  | 0.75298701 | 6124  | 0.22830396 |
| NMI       | 12 | 9.07E-06 | 2.1987013  | 0.4481394  | 0.18181818 | 4 | 254.4166667 | 0.76025974 | 7582  | 0.2061371  |
| C10B      | 10 | 9.02E-06 | 2.28960309 | 0.43679553 | 0.02222222 | 4 | 248.7952322 | 0.74207792 | 9848  | 0.22120922 |
| MAN5C1    | 15 | 8.97E-06 | 2.17727273 | 0.45929019 | 0.13333333 | 4 | 259.7333333 | 0.76454545 | 12004 | 0.20751399 |
| ERBIN     | 17 | 8.88E-06 | 2.29350649 | 0.43601359 | 0.08823529 | 4 | 191.5882353 | 0.7412987  | 11788 | 0.1786657  |
| AP151     | 11 | 8.82E-06 | 2.32987013 | 0.42920847 | 0.03636364 | 4 | 171.3636364 | 0.73402597 | 6970  | 0.16173768 |
| PRMALL1   | 9  | 8.78E-06 | 2.62077922 | 0.38156991 | 0.0        | 4 | 151         | 0.67854416 | 2044  | 0.25083612 |
| GYC1      | 16 | 8.72E-06 | 2.13506494 | 0.46836983 | 0.15333333 | 4 | 276.375     | 0.77287013 | 12348 | 0.21007605 |
| TMEM45A   | 10 | 8.53E-06 | 2.28831169 | 0.43700341 | 0.02222222 | 4 | 243.8       | 0.74233766 | 6966  | 0.22396313 |
| UFL1      | 13 | 8.28E-06 | 2.41103896 | 0.41475896 | 0.0        | 4 | 170.6923077 | 0.71779221 | 9862  | 0.18668021 |
| TNFRSF11B | 16 | 8.20E-06 | 2.1961039  | 0.45535186 | 0.175      | 4 | 237.25      | 0.76077922 | 10450 | 0.20497799 |
| NELL1     | 13 | 7.99E-06 | 2.19415584 | 0.45759614 | 0.0521821  | 4 | 243.6153846 | 0.76116883 | 4062  | 0.19848265 |
| FAM208B   | 9  | 7.71E-06 | 2.54090909 | 0.39355993 | 0.0        | 4 | 159.3333333 | 0.69188182 | 5794  | 0.2183808  |
| SERPINE2  | 9  | 7.65E-06 | 2.34675325 | 0.42612064 | 0.05555556 | 4 | 206         | 0.73064935 | 6030  | 0.20955119 |
| HUA-C     | 7  | 7.60E-06 | 2.47337662 | 0.40430559 | 0.0952381  | 4 | 168.8571429 | 0.70532468 | 2164  | 0.20724842 |
| MRFAPL1   | 13 | 7.57E-06 | 2.25974026 | 0.44252874 | 0.15384615 | 4 | 209.9230769 | 0.74805195 | 5636  | 0.18427373 |
| TNFSB4X   | 11 | 7.55E-06 | 2.22467532 | 0.45950379 | 0.0        | 4 | 251.3636364 | 0.75506494 | 1994  | 0.21250577 |
| CLPX      | 13 | 7.45E-06 | 2.20714286 | 0.45307143 | 0.0        | 4 | 230.7692    | 0.75051948 | 8748  | 0.21145781 |
| CEP76     | 13 | 7.42E-06 | 2.16753247 | 0.4613541  | 0.07692308 | 4 | 256         | 0.76649351 | 8134  | 0.20194588 |
| CASP4     | 8  | 7.41E-06 | 2.39415584 | 0.41768375 | 0.03571429 | 4 | 192.75      | 0.72116883 | 2414  | 0.20667384 |
| CASP6     | 12 | 7.32E-06 | 2.25454545 | 0.44354839 | 0.12121212 | 4 | 205.3333333 | 0.74909091 | 4074  | 0.18037232 |
| ILF6      | 16 | 7.27E-06 | 2.12662338 | 0.47022901 | 0.15       | 3 | 329.8125    | 0.77467532 | 10988 | 0.22747663 |
| CLF1      | 14 | 7.27E-06 | 2.22987013 | 0.44846561 | 0.25454545 | 4 | 186.8090909 | 0.74502597 | 8166  | 0.22588499 |
| TMEM165   | 14 | 7.26E-06 | 2.27272727 | 0.4        | 0.07692308 | 4 | 196.7142857 | 0.74545455 | 7092  | 0.17712225 |
| CDK10     | 13 | 7.25E-06 | 2.21883117 | 0.45068774 | 0.11538462 | 4 | 229.0769231 | 0.75623377 | 7470  | 0.19221021 |
| SPON2     | 12 | 7.24E-06 | 2.22207792 | 0.45002922 | 0.07575758 | 4 | 254.9166667 | 0.7558442  | 5362  | 0.21487894 |
| ZKSCAN7   | 9  | 7.22E-06 | 2.35116883 | 0.3950744  | 0.0        | 4 | 150.8888889 | 0.69976623 | 8008  | 0.21743603 |
| PPP1R1A   | 16 | 7.04E-06 | 2.22467532 | 0.42553191 | 0.02222222 | 4 | 205.1       | 0.71779221 | 5952  | 0.205154   |
| ASNSD1    | 12 | 6.96E-06 | 2.18896104 | 0.45683773 | 0.10606061 | 4 | 262.0833333 | 0.76220779 | 6890  | 0.21204754 |
| RABEP2    | 13 | 6.91E-06 | 2.17142857 | 0.46052632 | 0.15384615 | 4 |             |            |       |            |

|          |    |          |            |            |            |   |             |             |      |            |
|----------|----|----------|------------|------------|------------|---|-------------|-------------|------|------------|
| GPR18    | 7  | 2.59E-06 | 2.37142857 | 0.42168675 | 0.14285714 | 4 | 217         | 0.72571429  | 1628 | 0.22495554 |
| RAJ2     | 10 | 2.58E-06 | 2.31493506 | 0.43197756 | 0.11111111 | 4 | 248.9       | 0.73701299  | 3782 | 0.23689228 |
| WIDC2    | 7  | 2.47E-06 | 2.31493506 | 0.43197756 | 0.14285714 | 4 | 284.8571429 | 0.73701299  | 2250 | 0.27023357 |
| PURD1    | 8  | 2.45E-06 | 2.36298701 | 0.42319318 | 0.07142857 | 4 | 227.75      | 0.7274026   | 2832 | 0.23318789 |
| INTS8    | 8  | 2.33E-06 | 2.38376623 | 0.41950422 | 0.10714286 | 4 | 221.25      | 0.72324675  | 2126 | 0.23359788 |
| IGSF6    | 8  | 2.29E-06 | 2.37532468 | 0.42099508 | 0.10714286 | 4 | 227.125     | 0.72493506  | 2494 | 0.23730366 |
| METTL1   | 7  | 2.15E-06 | 2.46298701 | 0.40601107 | 0.14285714 | 4 | 186.8571429 | 0.7074026   | 1590 | 0.22535546 |
| GZMK     | 7  | 2.13E-06 | 2.42857143 | 0.41176471 | 0          | 4 | 225.7142857 | 0.71428571  | 2368 | 0.25448956 |
| REG1A    | 8  | 2.01E-06 | 2.31883117 | 0.43125175 | 0.14285714 | 4 | 270.125     | 0.73623377  | 3206 | 0.25726883 |
| NELFCD   | 4  | 1.96E-06 | 2.75324675 | 0.36320755 | 0          | 4 | 158.5       | 0.64935065  | 274  | 0.38697789 |
| URH1     | 9  | 1.91E-06 | 2.51103896 | 0.39824153 | 0.11111111 | 4 | 186.1111111 | 0.69779221  | 2810 | 0.24206867 |
| ISOC2    | 9  | 1.87E-06 | 2.21558442 | 0.45134818 | 0.22222222 | 4 | 330.5555556 | 0.75688312  | 2310 | 0.27500462 |
| CFB      | 4  | 1.86E-06 | 2.59415584 | 0.38548185 | 0.33333333 | 4 | 201.5       | 0.68116883  | 460  | 0.312986   |
| SNARC2   | 9  | 1.82E-06 | 2.21038961 | 0.45240093 | 0.27777778 | 4 | 338.1111111 | 0.75792208  | 1948 | 0.27714814 |
| KDELC1   | 6  | 1.80E-06 | 2.49415584 | 0.40093726 | 0          | 4 | 235.5       | 0.70116883  | 2764 | 0.29534005 |
| TRIM16   | 7  | 1.77E-06 | 2.41493506 | 0.41408981 | 0.04761905 | 4 | 228.2857143 | 0.71701299  | 1588 | 0.2534203  |
| HLA-DQB1 | 7  | 1.70E-06 | 2.46883117 | 0.40504997 | 0.0952381  | 4 | 197.1428571 | 0.70623377  | 1780 | 0.24001395 |
| NUDIB7   | 7  | 1.67E-06 | 2.33116883 | 0.42896936 | 0          | 4 | 286         | 0.73376623  | 1542 | 0.27643065 |
| SEL12    | 6  | 1.62E-06 | 2.46428571 | 0.4057971  | 0          | 4 | 225         | 0.70714286  | 1884 | 0.26890756 |
| FAIM     | 7  | 1.61E-06 | 2.33701299 | 0.42789664 | 0.14285714 | 4 | 266.8571429 | 0.7325974   | 1994 | 0.26185798 |
| APOC3    | 5  | 1.51E-06 | 2.47207792 | 0.40451799 | 0.1        | 4 | 224.6       | 0.70558442  | 1028 | 0.27317073 |
| SGCE     | 6  | 1.50E-06 | 2.42402597 | 0.41253683 | 0          | 4 | 259.1666667 | 0.71519481  | 2174 | 0.28877703 |
| ITTF1    | 8  | 1.45E-06 | 2.23766234 | 0.44689495 | 0.28571429 | 4 | 315.625     | 0.75246753  | 1740 | 0.26988879 |
| SRPX     | 7  | 1.43E-06 | 2.35       | 0.42553191 | 0.19047619 | 4 | 246.4385714 | 0.73        | 1726 | 0.24731318 |
| FCER1A   | 6  | 1.40E-06 | 2.41948052 | 0.41331186 | 0.33333333 | 4 | 238.3333333 | 0.7161039   | 1444 | 0.26730266 |
| ZNF444   | 7  | 1.32E-06 | 2.28441558 | 0.43774872 | 0.19047619 | 4 | 308.8571429 | 0.74311688  | 1258 | 0.28128663 |
| CYP4F12  | 7  | 1.30E-06 | 2.34805195 | 0.42584896 | 0.14285714 | 4 | 291.2857143 | 0.73038961  | 1632 | 0.29114829 |
| DNMT3L   | 6  | 1.26E-06 | 2.41818182 | 0.41353383 | 0.33333333 | 4 | 215.1666667 | 0.71636364  | 346  | 0.24949811 |
| CC2B     | 6  | 1.26E-06 | 2.62727273 | 0.38962184 | 0.33333333 | 4 | 209.3333333 | 0.67454545  | 2200 | 0.30555556 |
| LTF      | 6  | 1.18E-06 | 2.39805195 | 0.41700514 | 0.26666667 | 4 | 253.3333333 | 0.72038961  | 1050 | 0.27387387 |
| TCF15    | 6  | 1.17E-06 | 2.35974026 | 0.42377545 | 0.33333333 | 4 | 276.5       | 0.72805195  | 1210 | 0.27935223 |
| RRP4     | 6  | 1.12E-06 | 2.36623377 | 0.42261251 | 0          | 4 | 332.1666667 | 0.72675325  | 1618 | 0.33896281 |
| SNHG4    | 7  | 1.06E-06 | 2.32987013 | 0.42920847 | 0.0952381  | 4 | 285         | 0.73402597  | 1156 | 0.27868149 |
| R3HDM4   | 5  | 1.03E-06 | 2.77012987 | 0.36099391 | 0          | 4 | 139.6       | 0.64597403  | 874  | 0.33843602 |
| HACD2    | 6  | 9.60E-07 | 2.66038961 | 0.37588479 | 0          | 4 | 175.3333333 | 0.66792208  | 1440 | 0.31411411 |
| NAK35    | 5  | 9.30E-07 | 2.57337662 | 0.3885945  | 0.1        | 4 | 172.8       | 0.68532468  | 404  | 0.26090909 |
| LY96     | 5  | 8.20E-07 | 2.42727272 | 0.41275797 | 0          | 4 | 310         | 0.71545455  | 1308 | 0.344098   |
| ZNF330   | 8  | 8.10E-07 | 2.21623377 | 0.45121594 | 0.35714286 | 4 | 335.25      | 0.75675325  | 814  | 0.27891015 |
| OTF1     | 5  | 8.00E-07 | 2.41103896 | 0.41475996 | 0          | 4 | 305.8       | 0.71779221  | 1196 | 0.33716814 |
| JCHAIN   | 6  | 7.80E-07 | 2.64025974 | 0.37875061 | 0          | 4 | 187.3333333 | 0.67194805  | 1344 | 0.31055556 |
| NAE1     | 4  | 7.60E-07 | 2.63896104 | 0.37893701 | 0          | 4 | 193         | 0.67220779  | 1038 | 0.31893688 |
| COX7A1   | 4  | 7.30E-07 | 2.54675325 | 0.39265681 | 0.16666667 | 4 | 231.25      | 0.69064935  | 520  | 0.32823613 |
| HLA-DRB3 | 4  | 5.90E-07 | 2.7487013  | 0.36380817 | 0          | 4 | 154.75      | 0.65015974  | 800  | 0.33791209 |
| FOLR3    | 6  | 5.70E-07 | 2.42441558 | 0.41077621 | 0.2        | 4 | 260.5       | 0.71311688  | 484  | 0.29972118 |
| HLA-DRA  | 4  | 5.40E-07 | 2.60064935 | 0.38451935 | 0.33333333 | 4 | 192.5       | 0.67987013  | 166  | 0.30958132 |
| KLRB1    | 3  | 5.10E-07 | 2.5987013  | 0.3848076  | 0          | 4 | 278.6666667 | 0.68025974  | 752  | 0.43934599 |
| RP2      | 5  | 4.60E-07 | 2.37337662 | 0.42134063 | 0          | 4 | 316         | 0.72532468  | 576  | 0.32744283 |
| IGFALS   | 3  | 4.40E-07 | 2.73701299 | 0.3653618  | 0          | 4 | 187.3333333 | 0.6525974   | 482  | 0.38638368 |
| CASP1    | 5  | 4.30E-07 | 2.64025974 | 0.37875061 | 0.6        | 4 | 186.8       | 0.67194805  | 68   | 0.33597122 |
| KLK1     | 3  | 3.90E-07 | 2.72142857 | 0.36745407 | 0          | 4 | 208.3333333 | 0.65571429  | 490  | 0.41215951 |
| SLC39A4  | 4  | 3.20E-07 | 2.62532468 | 0.38090527 | 0.16666667 | 4 | 185         | 0.67493506  | 248  | 0.31701031 |
| SPHAR    | 3  | 3.20E-07 | 2.73701299 | 0.3653618  | 0          | 4 | 178.3333333 | 0.6525974   | 332  | 0.39060206 |
| ELC8     | 3  | 2.90E-07 | 2.93116883 | 0.34116083 | 0.66666667 | 4 | 47.33333333 | 0.61176623  | 4    | 0.36692506 |
| GERMN2   | 3  | 2.20E-07 | 2.76168831 | 0.36209734 | 0          | 4 | 179.3333333 | 0.647166234 | 298  | 0.41472868 |
| HLA-DRB4 | 3  | 2.20E-07 | 2.74935065 | 0.36372225 | 0          | 4 | 193.3333333 | 0.65012987  | 422  | 0.43220974 |
| ABHD14A  | 3  | 2.10E-07 | 2.78376623 | 0.35922557 | 0.33333333 | 4 | 151.6666667 | 0.64324675  | 172  | 0.40463458 |
| AAMDC    | 3  | 2.00E-07 | 2.80194805 | 0.35689455 | 0          | 4 | 180.3333333 | 0.63961039  | 322  | 0.45865303 |
| ADIRF    | 3  | 1.70E-07 | 2.83116883 | 0.35321101 | 0          | 4 | 173.6666667 | 0.63376623  | 252  | 0.47176885 |
| NDUFA3   | 3  | 8.00E-08 | 2.42727272 | 0.41275797 | 0.33333333 | 4 | 425         | 0.71545455  | 132  | 0.47661803 |
| HLA-DRB1 | 2  | 8.00E-08 | 2.87272727 | 0.34810127 | 0          | 4 | 179         | 0.62545455  | 130  | 0.57234727 |
| SERPINC1 | 2  | 5.00E-08 | 2.65       | 0.37735849 | 0          | 4 | 352         | 0.67        | 72   | 0.62014134 |
| PRODH    | 2  | 5.00E-08 | 2.55649351 | 0.39116078 | 0          | 4 | 421.5       | 0.6887013   | 92   | 0.59815078 |
| TNFAIP6  | 3  | 0        | 2.45909091 | 0.40665434 | 1          | 4 | 372.6666667 | 0.70818182  | 0    | 0.44365079 |
| TRIMPL   | 3  | 0        | 2.46298701 | 0.40601107 | 0          | 4 | 388.6666667 | 0.7074026   | 0    | 0.46888796 |
| CEL      | 2  | 0        | 2.60844156 | 0.38377067 | 1          | 4 | 374         | 0.67831169  | 0    | 0.59649123 |
| CAB      | 1  | 0        | 2.87532468 | 0.34778681 | 0          | 4 | 262         | 0.62493506  | 0    | 0          |
| PRKY     | 1  | 0        | 3.00454545 | 0.33282905 | 0          | 5 | 71          | 0.59909091  | 0    | 0          |
| INTS13   | 1  | 0        | 3.12337662 | 0.32016632 | 0          | 5 | 38          | 0.57532468  | 0    | 0          |
| MCUB     | 1  | 0        | 2.97532468 | 0.33609777 | 0          | 5 | 212         | 0.60493506  | 0    | 0          |
| PRELID3B | 1  | 0        | 3.14415584 | 0.31805039 | 0          | 5 | 14          | 0.57116883  | 0    | 0          |
| IGKC     | 1  | 0        | 2.97727273 | 0.33587786 | 0          | 4 | 177         | 0.60454545  | 0    | 0          |
| TCEAL2   | 1  | 0        | 3.49220779 | 0.2863518  | 0          | 5 | 44          | 0.50155844  | 0    | 0          |
| ZNF358   | 1  | 0        | 2.93181818 | 0.34108527 | 0          | 4 | 306         | 0.61363636  | 0    | 0          |
| DNPH1    | 1  | 0        | 3.04090909 | 0.32884903 | 0          | 5 | 196         | 0.59381818  | 0    | 0          |
| NBP20    | 1  | 0        | 2.84025974 | 0.35208048 | 0          | 4 | 336         | 0.63194805  | 0    | 0          |

| Kinases  |        |                       |                           |                     |                       |              |                          |            |        |                        |
|----------|--------|-----------------------|---------------------------|---------------------|-----------------------|--------------|--------------------------|------------|--------|------------------------|
| Kinase   | Degree | BetweennessCentrality | AverageShortestPathLength | ClosenessCentrality | ClusteringCoefficient | Eccentricity | NeighborhoodConnectivity | Radiality  | Stress | TopologicalCoefficient |
| MAPK1    | 122    | 0.00303409            | 1.93506494                | 0.51677852          | 0.10377998            | 3            | 163.7704918              | 0.81298701 | 729866 | 0.10801722             |
| PRKCA    | 90     | 8.25E-04              | 1.99285714                | 0.50179211          | 0.05892634            | 3            | 146.2                    | 0.80142857 | 353750 | 0.10055823             |
| GSK3B    | 89     | 8.23E-04              | 1.97272727                | 0.50891244          | 0.13302347            | 3            | 159.3096629              | 0.80545455 | 234648 | 0.10674157             |
| SRC      | 52     | 7.71E-04              | 2.06363636                | 0.4845815           | 0.15384615            | 3            | 109.3076923              | 0.78727273 | 55492  | 0.0786814              |
| RPS6KA3  | 88     | 7.56E-04              | 1.9987013                 | 0.50032489          | 0.0545977             | 3            | 166.0681818              | 0.80025974 | 488904 | 0.11456961             |
| MAPK14   | 62     | 6.87E-04              | 1.9961039                 | 0.50097593          | 0.16816499            | 3            | 164.983871               | 0.80077922 | 114988 | 0.11123921             |
| CDK2     | 61     | 6.71E-04              | 2.00779221                | 0.49805951          | 0.14590164            | 3            | 153.7868853              | 0.79844156 | 109960 | 0.10483087             |
| PRKCB    | 86     | 6.63E-04              | 1.98240753                | 0.50442188          | 0.08399453            | 4            | 173.4069767              | 0.80350949 | 364560 | 0.11751516             |
| ATM      | 72     | 6.30E-04              | 1.99155844                | 0.50211593          | 0.10093897            | 3            | 176.0138889              | 0.80168831 | 217210 | 0.11891852             |
| CDK6     | 92     | 5.72E-04              | 2.03116883                | 0.49232737          | 0.02795031            | 4            | 165.5217391              | 0.79376623 | 460742 | 0.11977788             |
| CSNK2A1  | 48     | 4.87E-04              | 2.06883117                | 0.48336472          | 0.11258865            | 4            | 104.3541667              | 0.78623377 | 50366  | 0.07527658             |
| MAPK3    | 45     | 4.71E-04              | 2.03116883                | 0.49232737          | 0.19292929            | 3            | 167.9555556              | 0.79376623 | 61136  | 0.11607157             |
| MAPK9    | 57     | 4.47E-04              | 2.07597403                | 0.4817016           | 0.04699248            | 4            | 146.3684211              | 0.78490519 | 173246 | 0.10770663             |
| AKT1     | 49     | 4.37E-04              | 2.04285714                | 0.48951049          | 0.14555782            | 3            | 130.8979592              | 0.79142857 | 59698  | 0.09195864             |
| CDK1     | 57     | 4.35E-04              | 2.03441558                | 0.49154165          | 0.12781955            | 4            | 142.5087719              | 0.79311688 | 71122  | 0.09958684             |
| HIPK2    | 70     | 3.95E-04              | 2.05584416                | 0.48641819          | 0.01863354            | 4            | 161.7                    | 0.78883117 | 282496 | 0.11909686             |
| PRKAA2   | 68     | 3.85E-04              | 2.07597403                | 0.4817016           | 0.01843723            | 3            | 172.7941377              | 0.78480519 | 303786 | 0.1302521              |
| WDRB     | 54     | 3.45E-04              | 2.00649351                | 0.49838188          | 0.13642961            | 3            | 174.1509434              | 0.7987013  | 106732 | 0.11811014             |
| PRKACB   | 66     | 2.83E-04              | 2.06363636                | 0.4845815           | 0.04568765            | 4            | 165.969697               | 0.78727273 | 237916 | 0.1213785              |
| PAK2     | 51     | 2.62E-04              | 2.03831169                | 0.4906021           | 0.09882353            | 3            | 171.8627451              | 0.79233766 | 119746 | 0.12039518             |
| TGFR1    | 62     | 2.28E-04              | 2.05519481                | 0.48657188          | 0.07033316            | 3            | 175.8548387              | 0.78896104 | 207974 | 0.12647946             |
| ABL1     | 44     | 2.25E-04              | 2.13311688                | 0.46879756          | 0.13107822            | 3            | 114.5227273              | 0.77337662 | 36436  | 0.08875969             |
| CSNK1G1  | 69     | 2.24E-04              | 2.12012897                | 0.47166922          | 0.00724638            | 4            | 169.8885007              | 0.77597403 | 269580 | 0.13652099             |
| MAP2K1   | 27     | 2.16E-04              | 2.23116883                | 0.44819558          | 0.11965812            | 4            | 124.5185185              | 0.75376623 | 23648  | 0.10761886             |
| ATR      | 30     | 1.96E-04              | 2.10779221                | 0.47443007          | 0.17011494            | 4            | 138.7333333              | 0.77844156 | 24600  | 0.1031994              |
| SMG1     | 50     | 1.86E-04              | 2.16883117                | 0.46107784          | 0.0024898             | 4            | 160.04                   | 0.76623377 | 162520 | 0.13393939             |
| PRPF4B   | 50     | 1.86E-04              | 2.18506494                | 0.4576523           | 0.01061224            | 4            | 162.98                   | 0.76298701 | 147782 | 0.13797619             |
| PRKDC    | 36     | 1.85E-04              | 2.06231766                | 0.48488465          | 0.17015187            | 3            | 156.9722722              | 0.78753247 | 20822  | 0.11154546             |
| AKT1     | 58     | 1.81E-04              | 2.00779221                | 0.49805951          | 0.0907441             | 4            | 214.7931035              | 0.79844156 | 186104 | 0.14619375             |
| MTOR     | 28     | 1.73E-04              | 2.26558442                | 0.41187722          | 0.06613757            | 4            | 103.1071429              | 0.74688312 | 29240  | 0.09378259             |
| TAF1     | 36     | 1.65E-04              | 2.14350649                | 0.4665253           | 0.06666667            | 4            | 152.8055556              | 0.7712987  | 59052  | 0.11943575             |
| CHUK     | 30     | 1.60E-04              | 2.17792208                | 0.45915125          | 0.15172414            | 3            | 132.7333333              | 0.76441558 | 20756  | 0.10750945             |
| EPHA3    | 43     | 1.49E-04              | 2.15779221                | 0.46343665          | 0.03469939            | 4            | 149.28                   | 0.76844156 | 137598 | 0.13696297             |
| ACVR1B   | 34     | 1.22E-04              | 2.17337662                | 0.46011353          | 0.0695365             | 4            | 147.0588235              | 0.76532468 | 86262  | 0.11915107             |
| CSNK1D   | 29     | 1.18E-04              | 2.1961039                 | 0.45353186          | 0.13546798            | 4            | 131.1034483              | 0.76077922 | 28256  | 0.10844371             |
| CDK9     | 20     | 9.26E-05              | 2.33441558                | 0.42837274          | 0.16842105            | 4            | 105.8                    | 0.73311688 | 8894   | 0.10527888             |
| RPS6KA5  | 28     | 8.90E-05              | 2.17597403                | 0.45956481          | 0.1031746             | 4            | 155.75                   | 0.76480519 | 25348  | 0.12569236             |
| PRKAA1   | 38     | 8.39E-05              | 2.15844156                | 0.46297273          | 0.0149218             | 4            | 184.8157895              | 0.76831169 | 86860  | 0.15671478             |
| PRKDC    | 27     | 8.30E-05              | 2.16103896                | 0.46274038          | 0.21937322            | 4            | 123.8518519              | 0.76779221 | 11204  | 0.09787732             |
| CSNK2A2  | 23     | 8.10E-05              | 2.23766234                | 0.44684995          | 0.17391304            | 4            | 124.0434783              | 0.75246753 | 12662  | 0.10780641             |
| STK17A   | 38     | 7.63E-05              | 2.2038961                 | 0.4537419           | 0.00142248            | 4            | 171.6578947              | 0.75922078 | 86638  | 0.14716425             |
| IRAK1    | 29     | 7.50E-05              | 2.29285714                | 0.43613707          | 0.0320197             | 4            | 146.6206897              | 0.74142857 | 46814  | 0.1391133              |
| PRKACA   | 26     | 6.63E-05              | 2.11621377                | 0.47253759          | 0.18769231            | 3            | 145.3461539              | 0.77679325 | 11506  | 0.08873752             |
| MAPK10   | 31     | 6.43E-05              | 2.21363636                | 0.45174538          | 0.04301075            | 4            | 155.4516129              | 0.75727273 | 423190 | 0.13224981             |
| FGFR3    | 17     | 6.18E-05              | 2.36558442                | 0.42727852          | 0.02941176            | 4            | 124.3529412              | 0.72688312 | 20606  | 0.12899466             |
| NUAK1    | 35     | 5.86E-05              | 2.23181818                | 0.44806517          | 0.01008403            | 4            | 168.9714286              | 0.75363636 | 71048  | 0.14859569             |
| CDK5     | 19     | 4.65E-05              | 2.30844156                | 0.4319269           | 0.23976608            | 4            | 114.8421053              | 0.73831169 | 4054   | 0.10999105             |
| EPHA1    | 13     | 4.42E-05              | 2.40519481                | 0.41576674          | 0.0564103             | 4            | 144.1538462              | 0.71896104 | 7082   | 0.15976695             |
| MAPK4    | 23     | 4.16E-05              | 2.18701299                | 0.45724466          | 0.06719368            | 4            | 172.3043478              | 0.76595974 | 23264  | 0.14064613             |
| BMPRII   | 32     | 3.99E-05              | 2.19675325                | 0.45521726          | 0.03830645            | 4            | 176.40625                | 0.76064935 | 53018  | 0.14706036             |
| PIM1     | 16     | 3.91E-05              | 2.3474026                 | 0.42600277          | 0.05                  | 4            | 143.3125                 | 0.73051948 | 6422   | 0.14543024             |
| TP53RK   | 27     | 3.89E-05              | 2.29285714                | 0.43613707          | 0.00854701            | 4            | 159.6296296              | 0.74142857 | 36296  | 0.15039282             |
| STK11    | 14     | 3.82E-05              | 2.33818182                | 0.43137255          | 0.21978022            | 4            | 137.7857143              | 0.73636364 | 6424   | 0.13288827             |
| RPS6KA1  | 18     | 3.75E-05              | 2.28116883                | 0.43837176          | 0.15686275            | 3            | 120.1111111              | 0.74376623 | 7960   | 0.11044608             |
| RAF1     | 22     | 3.67E-05              | 2.32792208                | 0.42956764          | 0.1991342             | 3            | 103.2727273              | 0.73441558 | 3484   | 0.10200323             |
| CHEK2    | 15     | 3.53E-05              | 2.4987013                 | 0.4002079           | 0.20952381            | 4            | 78.2                     | 0.70025974 | 2604   | 0.10285463             |
| CSNK1E   | 16     | 3.25E-05              | 2.3487013                 | 0.42576721          | 0.15                  | 4            | 113.0625                 | 0.73025974 | 5018   | 0.11447769             |
| PLK3     | 14     | 3.02E-05              | 2.46103896                | 0.4083245           | 0.21978022            | 4            | 106.6428571              | 0.70779221 | 3384   | 0.13028292             |
| AURKA    | 12     | 2.72E-05              | 2.33181818                | 0.4288499           | 0.15151515            | 4            | 162.9166667              | 0.73363636 | 5138   | 0.15963363             |
| NLK      | 25     | 2.44E-05              | 2.19675325                | 0.45521726          | 0.06666667            | 4            | 180.24                   | 0.76064935 | 24782  | 0.14900662             |
| GSK3A    | 16     | 2.44E-05              | 2.32077922                | 0.43088976          | 0.16666667            | 4            | 120.625                  | 0.73584416 | 3584   | 0.17050597             |
| CDK8     | 12     | 2.33E-05              | 2.46298701                | 0.40601107          | 0.15151515            | 4            | 111.5833333              | 0.7074026  | 3188   | 0.13654003             |
| CSNK1G3  | 17     | 2.21E-05              | 2.32402597                | 0.43028779          | 0.01470588            | 4            | 171.2941177              | 0.73519481 | 17968  | 0.16729206             |
| MAPK3    | 11     | 2.13E-05              | 2.37987013                | 0.420191            | 0.09090909            | 4            | 160.3636364              | 0.72402597 | 6410   | 0.16029892             |
| MAPK11   | 12     | 2.09E-05              | 2.3461039                 | 0.42623858          | 0.04545455            | 4            | 148.6666667              | 0.73077922 | 5232   | 0.1493441              |
| CSNK1G2  | 11     | 1.96E-05              | 2.4461039                 | 0.40881338          | 0.07272727            | 4            | 150.8181818              | 0.71077922 | 8658   | 0.1772084              |
| MAPKAPK2 | 19     | 1.88E-05              | 2.2974026                 | 0.43527417          | 0.02929737            | 4            | 167.7894737              | 0.74051948 | 17744  | 0.15794448             |
| TNRC2    | 12     | 1.87E-05              | 2.38051948                | 0.42007438          | 0.10606061            | 4            | 137.9166667              | 0.72239961 | 3440   | 0.14629826             |
| CDK4     | 16     | 1.82E-05              | 2.29415584                | 0.43589018          | 0.14166667            | 4            | 135.9375                 | 0.74116883 | 4052   | 0.12686916             |
| CAMK1D   | 12     | 1.57E-05              | 2.47662338                | 0.4037556           | 0                     | 4            | 137.0833333              | 0.70467532 | 12476  | 0.16946866             |
| MAPK8    | 16     | 1.57E-05              | 2.22142857                | 0.45016077          | 0.38333333            | 4            | 186.0625                 | 0.75571429 | 2500   | 0.15701477             |
| FGFR4    | 10     | 1.54E-05              | 2.49545455                | 0.4007786           | 0.02222222            | 4            | 126                      | 0.7090909  | 3886   | 0.16302083             |
| PAK4     | 9      | 9.90E-06              | 2.54202779                | 0.39335888          | 0.05555556            | 4            | 169.158484               | 0.69158484 | 3728   | 0.17548001             |
| TACC2    | 10     | 9.67E-06              | 2.5038961                 | 0.39937759          | 0.06666667            | 4            | 121.3                    | 0.69922078 | 4014   | 0.15923483             |
| CSNK1A1L | 12     | 9.42E-06              | 2.37727273                | 0.4206501           | 0.06060606            | 4            | 175.0833333              | 0.72454545 | 4972   | 0.18357869             |
| CAMK4    | 11     | 8.15E-06              | 2.37662338                | 0.42076503          | 0.09090909            | 4            | 180.5454546              | 0.72467532 | 5992   | 0.18887723             |
| HIPK3    | 12     | 7.33E-06              | 2.31038961                | 0.43282743          | 0.12121212            | 4            | 187.8333333              | 0.73792208 | 5542   | 0.17857143             |
| VPRK     | 6      | 7.18E-06              | 2.65649351                | 0.37634308          | 0                     | 4            | 131.5                    | 0.6687013  | 1238   | 0.21211996             |
| CAMK1G   | 10     | 5.80E-06              | 2.42987013                | 0.41154663          | 0.02222222            | 4            | 178.4                    | 0.71402597 | 5506   | 0.20136054             |
| RPS6KA4  | 9      | 5.61E-06              | 2.51948052                | 0.39690722          | 0.30555556            | 4            | 120.8888889              | 0.6961039  | 930    | 0.16499666             |
| IKBKE    | 8      | 3.83E-06              | 2.57987013                | 0.38761641          | 0                     | 4            | 137.75                   | 0.68402597 | 1790   | 0.21333853             |
| PRK01    | 8      | 3.56E-06              | 2.54805195                | 0.39245668          | 0.07142857            | 4            | 155.875                  | 0.69038961 | 2446   | 0.2224212              |
| PRK2     | 9      | 3.19E-06              | 2.4987013                 | 0.4002079           | 0                     | 4            | 164.3333333              | 0.70025974 | 3674   | 0.20994002             |
| GRK5     | 4      | 3.18E-06              | 2.78051948                | 0.35964503          | 0                     | 4            | 136.5                    | 0.6438961  | 1318   | 0.35564304             |
| VPRK1    | 4      | 2.60E-06              | 2.69545455                | 0.37099494          | 0                     | 4            | 140.75                   | 0.66090909 | 280    | 0.29236402             |
| CDK7     | 7      | 1.98E-06              | 2.40714286                | 0.41543027          | 0.33333333            | 4            | 193.7142857              | 0.71857143 | 1076   | 0.21271586             |
| MAP3K10  | 7      | 1.80E-06              | 2.56168831                | 0.39036755          | 0.38095238            | 4            | 136.8571429              | 0.68766234 | 482    | 0.20335385             |
| MAP3L5   | 4      | 9.60E-07              | 2.80454545                | 0.35656402          | 0.33333333            | 4            | 91.75                    | 0.63909091 | 124    | 0.3                    |
| PRKACG   | 5      | 5.60E-07              | 2.41233766                | 0.41453567          | 0.1                   | 4            | 287.6                    | 0          |        |                        |

| Transcription Factors (TF) |        |                       |                           |                     |                       |              |                          |            |         |                        |                  |        |
|----------------------------|--------|-----------------------|---------------------------|---------------------|-----------------------|--------------|--------------------------|------------|---------|------------------------|------------------|--------|
| TF                         | Degree | BetweennessCentrality | AverageShortestPathLength | ClosenessCentrality | ClusteringCoefficient | Eccentricity | NeighborhoodConnectivity | Radiality  | Stress  | TopologicalCoefficient | microRNA         | Degree |
| RUNX1                      | 542    | 0.04066004            | 1.65779221                | 0.60321191          | 0.05064165            | 3            | 65.58395522              | 0.86844156 | 2881052 | 0.04283733             | hsa-miR-584      | 249    |
| HNF4A                      | 492    | 0.03070174            | 1.73311688                | 0.57699513          | 0.02284689            | 3            | 50.4743763               | 0.85337662 | 2688422 | 0.03495189             | hsa-miR-4684-3p  | 212    |
| FLI1                       | 447    | 0.02956503            | 1.73331688                | 0.57699513          | 0.02473932            | 3            | 53.09548533              | 0.85327662 | 2676254 | 0.03695058             | hsa-miR-4484     | 224    |
| AR                         | 490    | 0.02793457            | 1.77077922                | 0.56472314          | 0.01386879            | 3            | 46.81557377              | 0.84584416 | 2949874 | 0.03181814             | hsa-miR-921      | 222    |
| MTTF                       | 457    | 0.02790831            | 1.76883117                | 0.56534508          | 0.02817767            | 3            | 53.8380744               | 0.84623377 | 2290568 | 0.0378096              | hsa-miR-550b     | 208    |
| FOXA1                      | 479    | 0.02554678            | 1.77012887                | 0.5649303           | 0.01401979            | 3            | 46.55114823              | 0.84597403 | 2700376 | 0.03661124             | hsa-miR-4764-3p  | 186    |
| TP63                       | 387    | 0.02174495            | 1.79090909                | 0.55837563          | 0.03779019            | 3            | 59.0984456               | 0.84181818 | 1759342 | 0.04032078             | hsa-miR-3659     | 219    |
| GATA3                      | 364    | 0.01720834            | 1.86038661                | 0.53752182          | 0.01533315            | 3            | 45.89285714              | 0.82722208 | 1680410 | 0.03356881             | hsa-miR-496      | 208    |
| TCF4                       | 336    | 0.01707457            | 1.84069009                | 0.54320888          | 0.04168443            | 3            | 61.55357143              | 0.83181818 | 1348674 | 0.04286544             | hsa-miR-4637     | 221    |
| TP53                       | 264    | 0.01542461            | 1.87597403                | 0.53305642          | 0.0414729             | 3            | 58.25572519              | 0.82480519 | 1135442 | 0.03990237             | hsa-miR-28-3p    | 198    |
| EP300                      | 348    | 0.01505979            | 1.80324675                | 0.55455528          | 0.04157143            | 3            | 61.25997701              | 0.83935065 | 1401536 | 0.04107732             | hsa-miR-4704-5p  | 224    |
| SMAD4                      | 327    | 0.01469652            | 1.80974026                | 0.55256548          | 0.06929684            | 3            | 78.91104294              | 0.83805195 | 1185492 | 0.05242851             | hsa-miR-3659     | 186    |
| RUNX2                      | 319    | 0.01422182            | 1.82922078                | 0.54668087          | 0.04712967            | 3            | 65.12539185              | 0.84345584 | 1148182 | 0.03748006             | hsa-miR-2275-3p  | 176    |
| STAT3                      | 375    | 0.01217346            | 1.88246573                | 0.53121766          | 0.03306844            | 3            | 55.53618421              | 0.82350649 | 1051794 | 0.03955106             | hsa-miR-208a     | 218    |
| VDR                        | 275    | 0.01185835            | 1.89350649                | 0.52812071          | 0.03053394            | 3            | 53.67883212              | 0.8212987  | 887314  | 0.03775228             | hsa-miR-3146     | 205    |
| MYB                        | 305    | 0.01181091            | 1.87337662                | 0.53379549          | 0.02791199            | 3            | 52.37704918              | 0.82532468 | 1022758 | 0.03686216             | hsa-miR-1244     | 200    |
| WT1                        | 318    | 0.01120841            | 1.87207792                | 0.5341658           | 0.02239946            | 3            | 52.87735849              | 0.82558442 | 1278470 | 0.03770218             | hsa-miR-21       | 226    |
| KDM2B                      | 313    | 0.01050806            | 1.89220779                | 0.52848318          | 0.02105349            | 3            | 51.78913718              | 0.8152584  | 1181244 | 0.03748006             | hsa-miR-5905-3p  | 223    |
| SP1                        | 275    | 0.01018882            | 2.01233766                | 0.49693449          | 0.02103052            | 3            | 41.15636364              | 0.79753247 | 978386  | 0.03413216             | hsa-miR-3613-5p  | 199    |
| SMAD2                      | 287    | 0.01009141            | 1.83701299                | 0.54436197          | 0.07989204            | 3            | 88.18881119              | 0.8325974  | 1032226 | 0.05859722             | hsa-miR-4772-5p  | 184    |
| FOXM1                      | 306    | 0.01006868            | 1.93246753                | 0.51747312          | 0.01748634            | 3            | 50.4248366               | 0.81350649 | 1338456 | 0.03844925             | hsa-miR-4474-5p  | 207    |
| SOX2                       | 251    | 0.00970323            | 1.9474026                 | 0.5135045           | 0.02256574            | 3            | 49.30278884              | 0.81051948 | 841636  | 0.03663084             | hsa-miR-208b     | 212    |
| PPARG                      | 253    | 0.00823063            | 1.92027792                | 0.52027027          | 0.02640044            | 3            | 54.11857708              | 0.81558442 | 779702  | 0.03888609             | hsa-miR-4423-3p  | 172    |
| BACH1                      | 187    | 0.00752724            | 1.9025794                 | 0.52559777          | 0.07963889            | 3            | 86.65775401              | 0.81948052 | 559590  | 0.05769135             | hsa-miR-4445     | 204    |
| SMAD3                      | 253    | 0.00744489            | 1.86298791                | 0.53677239          | 0.07041675            | 3            | 75.50396825              | 0.8274026  | 642468  | 0.05036956             | hsa-miR-770-5p   | 206    |
| RELA                       | 179    | 0.00728386            | 1.97792208                | 0.50558109          | 0.03961222            | 3            | 58.0960452               | 0.80441558 | 542746  | 0.04189765             | hsa-miR-505      | 172    |
| NR3C1                      | 205    | 0.00713196            | 1.88116883                | 0.5315844           | 0.0363184             | 3            | 116.9850746              | 0.82376623 | 839006  | 0.07686273             | hsa-miR-4796-5p  | 196    |
| E2F4                       | 249    | 0.00699856            | 2.08571429                | 0.47945205          | 0.0100777             | 4            | 42.7510402               | 0.78265714 | 781420  | 0.0386777              | hsa-miR-4816-5p  | 201    |
| POU3F2                     | 198    | 0.0069774             | 1.98873479                | 0.50359712          | 0.04450597            | 3            | 62.32323232              | 0.80285714 | 425206  | 0.04630563             | hsa-miR-3177-5p  | 172    |
| NCOR1                      | 201    | 0.00629375            | 1.90714286                | 0.52434457          | 0.06045224            | 3            | 73.10606061              | 0.81857143 | 480376  | 0.04928925             | hsa-miR-3152-3p  | 174    |
| MAF                        | 204    | 0.00597418            | 1.92597418                | 0.5192178           | 0.05297981            | 3            | 74.44117647              | 0.81480519 | 509726  | 0.05153169             | hsa-miR-591      | 180    |
| FOXK2                      | 243    | 0.00596509            | 2.01753247                | 0.49565497          | 0.0161208             | 3            | 48.04526749              | 0.79649351 | 1739578 | 0.03873037             | hsa-miR-508-3p   | 198    |
| BRD4                       | 222    | 0.00568211            | 1.95841658                | 0.51061008          | 0.0086899             | 3            | 56.35135135              | 0.8081169  | 657012  | 0.04101297             | hsa-miR-4703-3p  | 199    |
| KLF6                       | 217    | 0.00535105            | 1.92337662                | 0.51991897          | 0.05107527            | 3            | 71.11981567              | 0.81532468 | 500730  | 0.04957291             | hsa-miR-2964a-5p | 189    |
| GATA6                      | 196    | 0.00491583            | 1.96233766                | 0.50959629          | 0.03521716            | 3            | 59.92857143              | 0.80753247 | 455714  | 0.04307003             | hsa-miR-4671-3p  | 193    |
| CTNNB1                     | 175    | 0.00490263            | 1.91818182                | 0.52132701          | 0.08579882            | 3            | 83.73372781              | 0.81636364 | 390166  | 0.05596779             | hsa-miR-512-5p   | 196    |
| ATF3                       | 194    | 0.0048801             | 1.97857143                | 0.50541516          | 0.0378574             | 3            | 56.02173913              | 0.80402857 | 394074  | 0.04071334             | hsa-miR-503      | 173    |
| TAL1                       | 175    | 0.00483287            | 1.95127992                | 0.51247992          | 0.05109295            | 3            | 63.55274126              | 0.81558442 | 370658  | 0.04426609             | hsa-miR-190      | 199    |
| CDK2                       | 191    | 0.00461144            | 2.20779221                | 0.45246118          | 0.00969964            | 4            | 42.88481675              | 0.75844156 | 515572  | 0.04416282             | hsa-miR-4694-5p  | 183    |
| TCF3                       | 186    | 0.00448965            | 1.97532468                | 0.50624589          | 0.04811986            | 3            | 64.94495459              | 0.80493506 | 366992  | 0.04671731             | hsa-miR-4317     | 171    |
| TTF2                       | 151    | 0.00448252            | 1.97077922                | 0.50741351          | 0.06216336            | 3            | 72.5099337               | 0.80584416 | 298310  | 0.05068772             | hsa-miR-219-1-3p | 188    |
| GATA4                      | 179    | 0.00418418            | 2.05064935                | 0.48765041          | 0.02673164            | 3            | 54.5294171               | 0.79987013 | 419264  | 0.04289293             | hsa-miR-502-3p   | 203    |
| ZNF217                     | 214    | 0.00415426            | 1.88796324                | 0.52975976          | 0.09345784            | 3            | 86.28971983              | 0.82465714 | 412978  | 0.05756486             | hsa-miR-4716-5p  | 159    |
| GATA3                      | 209    | 0.00406762            | 2.11487571                | 0.51336621          | 0.04759297            | 3            | 47.64593301              | 0.77174289 | 476646  | 0.04215369             | hsa-miR-3144-3p  | 195    |
| CTCF                       | 161    | 0.00405134            | 2.03311688                | 0.4918564           | 0.03361801            | 3            | 58.46583851              | 0.81373662 | 354058  | 0.04469194             | hsa-miR-4633-5p  | 189    |
| ELF3                       | 195    | 0.0039711             | 2.01233766                | 0.49693449          | 0.03409992            | 4            | 58.60512821              | 0.79753247 | 391286  | 0.04460991             | hsa-miR-3162-3p  | 176    |
| CHD1                       | 190    | 0.00389266            | 2.08246753                | 0.48019956          | 0.01793372            | 4            | 48.71578947              | 0.78350649 | 401018  | 0.04102324             | hsa-miR-151-3p   | 188    |
| ELF4                       | 175    | 0.00375037            | 2.05332468                | 0.48165232          | 0.02963233            | 3            | 54.57412957              | 0.78493506 | 395850  | 0.04431455             | hsa-miR-4305     | 187    |
| NR1B                       | 178    | 0.00334537            | 1.97532468                | 0.50624589          | 0.04557862            | 3            | 67.41573034              | 0.80493506 | 325106  | 0.04842931             | hsa-miR-190b     | 201    |
| FOXO3                      | 134    | 0.00324474            | 1.98701299                | 0.50326797          | 0.0823701             | 3            | 100.1268657              | 0.8025974  | 358474  | 0.07052475             | hsa-miR-296-3p   | 163    |
| KLF5                       | 163    | 0.00307185            | 2.04359649                | 0.48935494          | 0.03552223            | 3            | 57.19018405              | 0.7912987  | 288192  | 0.04412058             | hsa-miR-154      | 193    |
| KLF4                       | 187    | 0.00303094            | 1.99090909                | 0.50228311          | 0.03582313            | 3            | 58.57219251              | 0.80181818 | 327404  | 0.0429573              | hsa-miR-4791     | 196    |
| MYC                        | 124    | 0.00281885            | 1.95779221                | 0.51077944          | 0.05577778            | 3            | 95.17073171              | 0.80844156 | 223158  | 0.04625564             | hsa-miR-4759     | 178    |
| JUND                       | 153    | 0.00271645            | 2.12337662                | 0.47094801          | 0.0245098             | 3            | 50.51633987              | 0.77532468 | 306754  | 0.04283936             | hsa-miR-409-5p   | 192    |
| IRF1                       | 123    | 0.00246514            | 2.00519481                | 0.49870466          | 0.11750503            | 4            | 135.6478873              | 0.79896104 | 173058  | 0.09283628             | hsa-miR-3681     | 178    |
| FOXP3                      | 122    | 0.00215351            | 2.17142857                | 0.46052632          | 0.02479008            | 3            | 50.61788618              | 0.76571429 | 171658  | 0.0450539              | hsa-miR-4327     | 159    |
| KDM5A                      | 129    | 0.0021188             | 2.03181818                | 0.49217002          | 0.06225394            | 4            | 88.34375                 | 0.79363636 | 233316  | 0.06518879             | hsa-miR-383      | 169    |
| E2F1                       | 121    | 0.00209951            | 2.16948052                | 0.46091984          | 0.02078788            | 3            | 52.1322314               | 0.7661039  | 153724  | 0.04586339             | hsa-miR-4219     | 156    |
| XRN2                       | 124    | 0.00203482            | 2.28701299                | 0.43725156          | 0.01888277            | 4            | 44.55645161              | 0.7425974  | 183434  | 0.04743528             | hsa-miR-5556-5p  | 169    |
| PAX3                       | 126    | 0.00189715            | 2.02727273                | 0.49327354          | 0.05942857            | 4            | 74.72222222              | 0.79454455 | 175828  | 0.05456422             | hsa-miR-3545-5p  | 170    |
| PRDM14                     | 131    | 0.00161568            | 2.46493506                | 0.4056902           | 0.06022431            | 4            | 43.8778626               | 0.70701299 | 202064  | 0.07098359             | hsa-miR-4473     | 190    |
| ARNT                       | 116    | 0.00148765            | 2.03636364                | 0.49107143          | 0.08245877            | 3            | 83.0862069               | 0.79277227 | 154504  | 0.06077365             | hsa-miR-215-5p   | 188    |
| JUN                        | 67     | 0.00141308            | 2.03311688                | 0.4918564           | 0.13432836            | 3            | 101.7761184              | 0.8373662  | 103236  | 0.07169228             | hsa-miR-4777-3p  | 187    |
| CLCK                       | 95     | 0.00127267            | 2.07207792                | 0.48260733          | 0.07256439            | 4            | 91.88421053              | 0.7558442  | 138590  | 0.06590933             | hsa-miR-6258-3p  | 187    |
| CTBP2                      | 95     | 0.00120343            | 2.08890104                | 0.47870687          | 0.05999104            | 3            | 69.84210526              | 0.78220779 | 111760  | 0.05350661             | hsa-miR-3682-3p  | 159    |
| NFE2L2                     | 93     | 0.00120002            | 1.98051948                | 0.50491803          | 0.13330148            | 3            | 120.6630435              | 0.8038961  | 127138  | 0.08163941             | hsa-miR-3689a-5p | 205    |
| ELF5                       | 100    | 0.00108235            | 2.06363636                | 0.4845815           | 0.06444444            | 3            | 76.92                    | 0.78277273 | 106432  | 0.05749439             | hsa-miR-1284     | 159    |
| AHR                        | 103    | 0.00106489            | 1.97077922                | 0.50741351          | 0.14376238            | 3            | 123.2772277              | 0.80584416 | 155882  | 0.08307091             | hsa-miR-4216     | 175    |
| PAD14                      | 92     | 0.00101251            | 2.26623377                | 0.44126074          | 0.01911132            | 4            | 47.69565217              | 0.74675325 | 90448   | 0.04698283             | hsa-miR-3254-5p  | 163    |
| FUS                        | 76     | 9.64E-04              | 2.14544545                | 0.46610169          | 0.07315315            | 4            | 83.12                    | 0.77090099 | 88888   | 0.06730468             | hsa-miR-323b-5p  | 166    |
| IRF8                       | 48     | 7.70E-04              | 2.05584416                | 0.48641819          | 0.13475177            | 4            | 135.5208333              | 0.78883117 | 88926   | 0.09617269             | hsa-miR-3117-3p  | 159    |
| EME1E5                     | 74     | 7.14E-04              | 2.42523468                | 0.41231593          | 0.0188819             | 4            | 47.25675676              | 0.71493506 | 67678   | 0.05993702             | hsa-miR-1258     | 159    |
| HIF1A                      | 57     | 2.09E-04              | 2.06836364                | 0.79390283          | 0.10519483            | 3            | 91.64285714              | 0.80584416 | 14474   | 0.06787037             | hsa-miR-4516     | 159    |

|                  |     |
|------------------|-----|
| hsa-miR-548ad    | 125 |
| hsa-miR-3651     | 123 |
| hsa-miR-4798-3p  | 110 |
| hsa-miR-554      | 113 |
| hsa-miR-601      | 118 |
| hsa-miR-621      | 110 |
| hsa-miR-4462     | 74  |
| hsa-miR-3150b-5p | 120 |
| hsa-miR-3150a-5p | 120 |
| hsa-miR-4681     | 63  |
| hsa-miR-3676     | 66  |
| hsa-miR-553      | 67  |
| hsa-miR-1468     | 65  |
| hsa-miR-1537     | 58  |
| hsa-miR-191      | 56  |
| hsa-miR-4671-5p  | 52  |
| hsa-miR-4315     | 60  |
| hsa-miR-95       | 47  |
| hsa-miR-508      | 55  |
| hsa-miR-4304     | 49  |
| hsa-miR-1282     | 46  |
| hsa-miR-521      | 52  |
| hsa-miR-4790-5p  | 53  |
| hsa-miR-887      | 47  |
| hsa-miR-548a1    | 50  |
| hsa-miR-574-3p   | 47  |
| hsa-miR-933      | 47  |
| hsa-miR-518e     | 41  |
| hsa-miR-451      | 37  |
| hsa-miR-518d-3p  | 51  |
| hsa-miR-518a-3p  | 51  |
| hsa-miR-518b     | 51  |
| hsa-miR-518c     | 51  |
| hsa-miR-518f     | 51  |
| hsa-miR-891a     | 43  |
| hsa-miR-517c     | 36  |
| hsa-miR-517a     | 36  |
| hsa-miR-718      | 41  |
| hsa-miR-317-5p   | 42  |
| hsa-miR-4798-5p  | 35  |
| hsa-miR-3669     | 37  |
| hsa-miR-3186-3p  | 27  |
| hsa-miR-4636     | 35  |
| hsa-miR-1306     | 38  |
| hsa-miR-487b     | 37  |
| hsa-miR-3610     | 32  |
| hsa-miR-100      | 28  |
| hsa-miR-99b      | 28  |
| hsa-miR-99a      | 28  |

| microRNAs             |                           |                     |                       |              |                          |            |         |                        |  |
|-----------------------|---------------------------|---------------------|-----------------------|--------------|--------------------------|------------|---------|------------------------|--|
| BetweennessCentrality | AverageShortestPathLength | ClosenessCentrality | ClusteringCoefficient | Eccentricity | NeighborhoodConnectivity | Radiality  | Stress  | TopologicalCoefficient |  |
| 0.00540044            | 1.91883117                | 0.52115059          | 0.0295375             | 3            | 65.48192771              | 0.81623377 | 1063252 | 0.04684929             |  |
| 0.00513997            | 1.97597403                | 0.50607953          | 0.02566395            | 4            | 62.25943396              | 0.80480519 | 1016576 | 0.04621589             |  |
| 0.00509273            | 1.96238701                | 0.50942772          | 0.0238245             | 3            | 60.48460714              | 0.80740262 | 841098  | 0.04684869             |  |
| 0.00509155            | 1.9587013                 | 0.50031489          | 0.02087155            | 3            | 58.17117117              | 0.80025974 | 971636  | 0.04495782             |  |
| 0.00496663            | 1.96168831                | 0.50976498          | 0.02396878            | 4            | 58.83653846              | 0.80766234 | 797204  | 0.04295257             |  |
| 0.00486663            | 2                         | 0.5                 | 0.02539959            | 3            | 61.14516219              | 0.8        | 853632  | 0.04599896             |  |
| 0.00469491            | 1.96623377                | 0.50858653          | 0.02609861            | 3            | 63.49315068              | 0.80675325 | 907840  | 0.04689559             |  |
| 0.00452219            | 1.90636236                | 0.4845315           | 0.01616409            | 4            | 56.04807092              | 0.78727273 | 808406  | 0.04681155             |  |
| 0.00452204            | 2.03506494                | 0.49138481          | 0.01822295            | 3            | 56.57466063              | 0.79296701 | 869432  | 0.04573289             |  |
| 0.00451802            | 2.04155844                | 0.48982188          | 0.02302021            | 4            | 61.21212121              | 0.79168831 | 1102418 | 0.04899314             |  |
| 0.00437503            | 2.01168831                | 0.49707049          | 0.01805734            | 4            | 58.10267857              | 0.79766234 | 913396  | 0.04587646             |  |
| 0.00412123            | 2.01103896                | 0.49725541          | 0.02662017            | 4            | 59.34408602              | 0.79779221 | 698660  | 0.04515555             |  |
| 0.00411635            | 2.03896104                | 0.49044586          | 0.02019481            | 3            | 56.73863636              | 0.79220779 | 665798  | 0.04461595             |  |
| 0.00410838            | 1.98051948                | 0.50401803          | 0.02405615            | 3            | 60.19266055              | 0.8038961  | 759352  | 0.0450904              |  |
| 0.00405453            | 2.03896104                | 0.49044586          | 0.01807747            | 3            | 58                       | 0.79220779 | 787600  | 0.04663651             |  |
| 0.00405171            | 1.99285714                | 0.50179211          | 0.02422111            | 4            | 61.595                   | 0.80142857 | 708544  | 0.04629142             |  |
| 0.00394026            | 1.97207792                | 0.50707935          | 0.0253294             | 4            | 62.34070796              | 0.80558442 | 874020  | 0.04689394             |  |
| 0.00390058            | 1.98246753                | 0.50442188          | 0.02215993            | 4            | 60.47133632              | 0.80350649 | 904638  | 0.04573231             |  |
| 0.00386508            | 2.09935065                | 0.47633777          | 0.01324806            | 3            | 54.17085427              | 0.78012987 | 744946  | 0.04775651             |  |
| 0.00383587            | 2.00649351                | 0.49638188          | 0.02803516            | 3            | 63.52717391              | 0.7987013  | 714292  | 0.04769941             |  |
| 0.0037821             | 1.0844156                 | 0.47428395          | 0.01397683            | 4            | 57.1784396               | 0.77831169 | 795666  | 0.05109324             |  |
| 0.00377153            | 1.97922078                | 0.50524934          | 0.02445676            | 3            | 60.88679245              | 0.80415584 | 716596  | 0.04542827             |  |
| 0.00376057            | 2.04637625                | 0.48765042          | 0.02098944            | 4            | 62.71511628              | 0.79012867 | 878500  | 0.04555681             |  |
| 0.0037463             | 1.99350649                | 0.50162866          | 0.01951125            | 3            | 59.82352941              | 0.8012987  | 806336  | 0.04553211             |  |
| 0.00371156            | 2.03701299                | 0.49091489          | 0.01624438            | 3            | 57.50485437              | 0.7925974  | 879564  | 0.04663694             |  |
| 0.00354902            | 2.00779221                | 0.49805951          | 0.03073575            | 3            | 61.69767442              | 0.79844156 | 524246  | 0.04615425             |  |
| 0.00354172            | 2.0012987                 | 0.49967554          | 0.025955              | 3            | 61.46938776              | 0.79974026 | 699392  | 0.04651406             |  |
| 0.00350761            | 2.07377140                | 0.48820504          | 0.01803091            | 4            | 57.28772404              | 0.78531468 | 715548  | 0.04795287             |  |
| 0.00348319            | 1.98051948                | 0.50401803          | 0.03159204            | 4            | 64.2388097               | 0.8038961  | 618844  | 0.04744767             |  |
| 0.00346428            | 1.9987013                 | 0.50031489          | 0.02757292            | 3            | 64.63218391              | 0.80025974 | 637124  | 0.04801825             |  |
| 0.00346273            | 1.97012987                | 0.50758075          | 0.03500931            | 3            | 68.25                    | 0.80597403 | 598802  | 0.04900551             |  |
| 0.00343923            | 1.97272727                | 0.50691244          | 0.02491924            | 4            | 61.8030303               | 0.80545455 | 700038  | 0.04672921             |  |
| 0.00343476            | 1.97843679                | 0.49848363          | 0.02084369            | 4            | 64.26111111              | 0.80403597 | 640224  | 0.04795682             |  |
| 0.00342489            | 2.08961039                | 0.47855811          | 0.01649218            | 4            | 56.21693122              | 0.78618182 | 584272  | 0.04752032             |  |
| 0.0033801             | 2.01948052                | 0.49517685          | 0.02072539            | 3            | 58.36787565              | 0.7961039  | 682976  | 0.04535597             |  |
| 0.00335807            | 2.04415584                | 0.48919949          | 0.01679749            | 4            | 58.21938776              | 0.79116883 | 757546  | 0.04693382             |  |
| 0.00331495            | 2.12402597                | 0.47080044          | 0.01680333            | 3            | 53.47976879              | 0.75715481 | 515678  | 0.04699993             |  |
| 0.00329719            | 2.01883117                | 0.50253612          | 0.02053612            | 3            | 62.6834171               | 0.79623377 | 687694  | 0.04795682             |  |
| 0.00325375            | 2.10909091                | 0.47413793          | 0.01717408            | 3            | 56.48087432              | 0.78818182 | 661120  | 0.04934824             |  |
| 0.00322605            | 2.05584416                | 0.48641819          | 0.02112143            | 3            | 58.22222222              | 0.78883117 | 625196  | 0.04635857             |  |
| 0.00321552            | 2.06688312                | 0.48382023          | 0.01803391            | 4            | 57.95212766              | 0.78662338 | 617022  | 0.047544               |  |
| 0.00321082            | 2.02373762                | 0.49427336          | 0.01936302            | 4            | 59.7044315               | 0.79532468 | 799898  | 0.04718673             |  |
| 0.00319686            | 2.00714366                | 0.49820264          | 0.03640267            | 4            | 67.95939748              | 0.78877451 | 523446  | 0.05021468             |  |
| 0.00318373            | 2.07101299                | 0.49091489          | 0.01866244            | 3            | 57.73333333              | 0.7925974  | 644794  | 0.04573838             |  |
| 0.00316801            | 2.02857143                | 0.49295775          | 0.0194754             | 4            | 60.19047619              | 0.79428571 | 714158  | 0.04700998             |  |
| 0.0031406             | 2.01363636                | 0.496614            | 0.02551948            | 4            | 62.39204545              | 0.79727273 | 555204  | 0.04725789             |  |
| 0.00303301            | 2.06818182                | 0.48351648          | 0.01473433            | 3            | 56.95744681              | 0.78636364 | 637300  | 0.04718643             |  |
| 0.00300304            | 2.02373762                | 0.49672636          | 0.02455293            | 4            | 62.36363636              | 0.79532468 | 620896  | 0.04834648             |  |
| 0.00295797            | 2.01558442                | 0.49613402          | 0.0259204             | 3            | 64.32383008              | 0.79688312 | 707186  | 0.04980142             |  |
| 0.00289621            | 2.10064935                | 0.47604328          | 0.0161327             | 3            | 56.22699387              | 0.77987013 | 584584  | 0.04760736             |  |
| 0.0028875             | 2.04155844                | 0.48982188          | 0.019538              | 4            | 60.30569948              | 0.79168831 | 618164  | 0.04810363             |  |
| 0.00286086            | 2.02987013                | 0.49264235          | 0.01894296            | 4            | 60.81632653              | 0.79402597 | 774312  | 0.04800805             |  |
| 0.00285898            | 2.0714528                 | 0.48273627          | 0.02236827            | 4            | 62.55819798              | 0.78571429 | 649426  | 0.04901492             |  |
| 0.00285341            | 2.07857143                | 0.48109966          | 0.01788831            | 4            | 60.22359833              | 0.78428571 | 603908  | 0.0503283              |  |
| 0.00281633            | 2.13831169                | 0.46765867          | 0.01504475            | 4            | 57.85393258              | 0.77233766 | 595042  | 0.05225433             |  |
| 0.00279313            | 2.06883117                | 0.48336472          | 0.02483879            | 3            | 64.26415094              | 0.78623377 | 502022  | 0.05150256             |  |
| 0.00275924            | 2.00519481                | 0.49870466          | 0.0309242             | 3            | 67.3846138               | 0.79896048 | 581070  | 0.05015245             |  |
| 0.00275523            | 2.0025974                 | 0.49921449          | 0.0299421             | 4            | 65.80760121              | 0.79465455 | 430906  | 0.04902151             |  |
| 0.00274873            | 2.14480519                | 0.46624281          | 0.03130739            | 3            | 54.36312849              | 0.77103896 | 530354  | 0.04970937             |  |
| 0.00272346            | 2.02142857                | 0.49469965          | 0.02902889            | 4            | 65.08235294              | 0.79571429 | 495842  | 0.04948888             |  |
| 0.0026883             | 2.13961039                | 0.46737481          | 0.01258702            | 4            | 56.71052632              | 0.77207792 | 645226  | 0.05184863             |  |
| 0.00268083            | 1.98636364                | 0.50343249          | 0.02719308            | 3            | 64.76395745              | 0.80277277 | 589918  | 0.04778978             |  |
| 0.00266637            | 2.05234675                | 0.48767352          | 0.02073825            | 4            | 59.70718332              | 0.7893065  | 540372  | 0.04795388             |  |
| 0.00263969            | 2.16818182                | 0.46121593          | 0.01046518            | 4            | 56.45454545              | 0.76636364 | 608034  | 0.04545314             |  |
| 0.00263813            | 2.0974026                 | 0.47678019          | 0.0187087             | 4            | 57.26415094              | 0.78051948 | 442206  | 0.0476213              |  |
| 0.00263544            | 2.06298701                | 0.48471403          | 0.01683405            | 3            | 59.17560976              | 0.7874026  | 729114  | 0.04919547             |  |
| 0.00263251            | 2.04675325                | 0.48857868          | 0.02706791            | 4            | 62.27672956              | 0.79064935 | 485926  | 0.04844533             |  |
| 0.00259057            | 2.05454545                | 0.48672566          | 0.02449918            | 3            | 63.24571429              | 0.78009091 | 530180  | 0.05025971             |  |
| 0.00253438            | 2.02857143                | 0.49295775          | 0.03294706            | 4            | 66.43558282              | 0.78428571 | 502604  | 0.05036544             |  |
| 0.00253344            | 2.07922078                | 0.48094941          | 0.01935013            | 3            | 59.0060241               | 0.78415584 | 499542  | 0.04820758             |  |
| 0.00253095            | 2.10974026                | 0.4733992           | 0.01934559            | 3            | 61.18228994              | 0.77805195 | 631490  | 0.05214526             |  |
| 0.00252567            | 2.02142857                | 0.49469965          | 0.03104848            | 4            | 68.4842763               | 0.79571429 | 510122  | 0.05119949             |  |
| 0.00251976            | 2.07272727                | 0.49256514          | 0.02300772            | 4            | 63.20754717              | 0.79454545 | 533950  | 0.05082639             |  |
| 0.00251589            | 2.18831169                | 0.45697329          | 0.01190476            | 4            | 54.4132856               | 0.76231766 | 544250  | 0.05291284             |  |
| 0.00250271            | 2.01558442                | 0.49613402          | 0.03226539            | 4            | 68.71165644              | 0.79688312 | 458760  | 0.05124692             |  |
| 0.00249903            | 2.1987013                 | 0.45481394          | 0.0124005             | 3            | 52.17419355              | 0.76025974 | 456298  | 0.05056176             |  |
| 0.00249893            | 2.03181818                | 0.4954955           | 0.02491997            | 3            | 62.91061453              | 0.79636364 | 514796  | 0.04789299             |  |
| 0.00246158            | 2.04025974                | 0.48767352          | 0.02134464            | 4            | 61.08474576              | 0.79148025 | 648804  | 0.05260021             |  |
| 0.00246167            | 2.12077922                | 0.4715248           | 0.01606086            | 3            | 56.70414201              | 0.77584416 | 538494  | 0.04943056             |  |
| 0.0024696             | 2.03246753                | 0.49201278          | 0.02691551            | 4            | 64.4494382               | 0.79350649 | 527658  | 0.04986064             |  |
| 0.00244299            | 2.09350649                | 0.47766749          | 0.01878489            | 4            | 58.42285714              | 0.7812987  | 513836  | 0.04989289             |  |
| 0.00243245            | 2.08116883                | 0.48049922          | 0.01958443            | 4            | 58.64150943              | 0.78376623 | 446328  | 0.04757153             |  |
| 0.00242054            | 2.02727273                | 0.49073754          | 0.0280325             | 3            | 65.78100629              | 0.79454545 | 502240  | 0.04982677             |  |
| 0.00241344            | 2.21428571                | 0.4516129           | 0.00880131            | 4            | 55.41142857              | 0.75714286 | 624670  | 0.05694765             |  |
| 0.00241095            | 2.08246753                | 0.48019956          | 0.02159966            | 3            | 60.00595238              | 0.78350649 | 47722   | 0.04938363             |  |
| 0.0024068             | 2.02514285                | 0.4924308           | 0.0240356             | 4            | 64.5438196               | 0.79454545 | 503796  | 0.050376               |  |
| 0.00232259            | 2.1128701                 | 0.47326368          | 0.01773764            | 4            | 57.85430382              | 0.7774026  | 453796  | 0.04934756             |  |
| 0.00228651            | 2.1344558                 | 0.46651232          | 0.01524539            | 4            | 57.1405882               | 0.7731688  | 470812  | 0.05059346             |  |
| 0.00228529            | 2.04287514                | 0.48951049          | 0.02582746            | 4            | 67.02582746              | 0.79142857 | 449766  | 0.04876514             |  |
| 0.0021699             | 2.04025974                | 0.49013367          | 0.0213367             | 4            | 63.30957381              | 0.79158055 | 543842  | 0.04948163             |  |
| 0.00216989            | 2.04025974                | 0.49013367          | 0.02580553            | 4            | 63.30957381              | 0.79054805 | 543842  | 0.04989005             |  |
| 0.00214871            | 2.08701299                | 0.4791537           | 0.02255149            | 4            | 62.99319728              | 0.7825974  | 448564  | 0.05101212             |  |
| 0                     |                           |                     |                       |              |                          |            |         |                        |  |

|            |            |            |            |   |             |            |        |             |
|------------|------------|------------|------------|---|-------------|------------|--------|-------------|
| 0.00145994 | 2.08896104 | 0.47870687 | 0.03406452 | 4 | 67.456      | 0.78220779 | 252750 | 0.05352426  |
| 0.00127719 | 2.32987013 | 0.42920847 | 0.00852992 | 4 | 54.6504065  | 0.73402597 | 316806 | 0.063980801 |
| 0.0116473  | 2.11881117 | 0.47195832 | 0.03569475 | 4 | 67.97272727 | 0.75623377 | 253480 | 0.0551568   |
| 0.00106377 | 2.17402597 | 0.45907611 | 0.02544248 | 4 | 63.59262035 | 0.76519481 | 189366 | 0.05579272  |
| 0.00102267 | 2.15324675 | 0.46441496 | 0.03578154 | 4 | 69.58474576 | 0.76935065 | 215318 | 0.05939453  |
| 0.0009731  | 2.32662338 | 0.42980742 | 0.01801501 | 4 | 58.8        | 0.73467532 | 175312 | 0.06573269  |
| 0.00095467 | 2.23051948 | 0.44832606 | 0.02517586 | 4 | 61.05405405 | 0.7538961  | 135290 | 0.05574014  |
| 0.00094747 | 2.24805195 | 0.44442958 | 0.01862745 | 4 | 61.94166667 | 0.75038961 | 248828 | 0.06140438  |
| 0.00094747 | 2.24805195 | 0.44442958 | 0.01862745 | 4 | 61.94166667 | 0.75038961 | 248828 | 0.06140438  |
| 0.00052742 | 2.32467532 | 0.4301676  | 0.02611367 | 4 | 59.01587302 | 0.73506494 | 71796  | 0.0613336   |
| 0.00046369 | 2.35844156 | 0.42400881 | 0.01911422 | 4 | 60.59090909 | 0.72831169 | 81630  | 0.06736649  |
| 0.00046041 | 2.32597403 | 0.42992741 | 0.03346902 | 4 | 65.08955224 | 0.73480519 | 106310 | 0.06867892  |
| 0.00042476 | 2.32922078 | 0.42912813 | 0.02211538 | 4 | 60.21538462 | 0.73415584 | 72060  | 0.06358429  |
| 0.00037957 | 2.33702299 | 0.42789664 | 0.02117362 | 4 | 58.62068966 | 0.73252974 | 67716  | 0.06195145  |
| 0.00035184 | 2.57532468 | 0.38830055 | 0.01168831 | 4 | 51.80357143 | 0.68493506 | 61386  | 0.09067882  |
| 0.00031496 | 2.37792208 | 0.42053523 | 0.02564103 | 4 | 62.03846154 | 0.72441558 | 47968  | 0.06956503  |
| 0.00027161 | 2.22337662 | 0.44976636 | 0.05367232 | 4 | 73.35       | 0.75532468 | 40932  | 0.06476569  |
| 0.0002617  | 2.27402597 | 0.43974872 | 0.03977798 | 3 | 81.76595745 | 0.74519481 | 43248  | 0.07228678  |
| 0.00025451 | 2.52012987 | 0.39680455 | 0.01616162 | 4 | 58.16363636 | 0.69597403 | 42036  | 0.08772658  |
| 0.00024856 | 2.40324675 | 0.41610376 | 0.02806122 | 4 | 59.04081633 | 0.71935065 | 43150  | 0.06887455  |
| 0.00024048 | 2.33571429 | 0.42813456 | 0.03864734 | 4 | 70.67391304 | 0.73285714 | 34168  | 0.07289135  |
| 0.00023962 | 2.55909091 | 0.39076377 | 0.00829563 | 4 | 56.05769231 | 0.68818182 | 56530  | 0.09370926  |
| 0.00023882 | 2.23311688 | 0.44780459 | 0.05950653 | 4 | 77.45283019 | 0.75331662 | 36638  | 0.0690027   |
| 0.00020145 | 2.32597403 | 0.42992741 | 0.04902868 | 4 | 68.21276596 | 0.73480519 | 32812  | 0.06929533  |
| 0.00020057 | 2.37922078 | 0.42030568 | 0.02204082 | 4 | 60.96       | 0.72415584 | 31992  | 0.06838418  |
| 0.00019647 | 2.53701299 | 0.39416432 | 0.01387604 | 4 | 55          | 0.69252974 | 32904  | 0.08544092  |
| 0.00018555 | 2.39480519 | 0.4175705  | 0.02960222 | 4 | 67.78723404 | 0.72103896 | 35112  | 0.07763016  |
| 0.00016129 | 2.47142857 | 0.40462428 | 0.01585366 | 4 | 63.53658537 | 0.70571429 | 28722  | 0.08379072  |
| 0.00015812 | 2.6461039  | 0.37791411 | 0.00750751 | 4 | 47.10810811 | 0.67077922 | 20246  | 0.09630837  |
| 0.00014229 | 2.62142857 | 0.38147139 | 0.00627451 | 4 | 57.39215686 | 0.67571429 | 54192  | 0.11455108  |
| 0.00014229 | 2.62142857 | 0.38147139 | 0.00627451 | 4 | 57.39215686 | 0.67571429 | 54192  | 0.11455108  |
| 0.00014229 | 2.62142857 | 0.38147139 | 0.00627451 | 4 | 57.39215686 | 0.67571429 | 54192  | 0.11455108  |
| 0.00014229 | 2.62142857 | 0.38147139 | 0.00627451 | 4 | 57.39215686 | 0.67571429 | 54192  | 0.11455108  |
| 0.00013728 | 2.42337662 | 0.41264737 | 0.02547065 | 4 | 68.41860465 | 0.71532468 | 31842  | 0.082455    |
| 0.0001194  | 2.50714286 | 0.3988604  | 0.02380952 | 4 | 54.91666667 | 0.69857143 | 23496  | 0.07717803  |
| 0.0001194  | 2.50714286 | 0.3988604  | 0.02380952 | 4 | 54.91666667 | 0.69857143 | 23496  | 0.07717803  |
| 0.0001193  | 2.73571429 | 0.36553525 | 0          | 4 | 90.24390244 | 0.65385714 | 27386  | 0.14832501  |
| 0.00011718 | 2.30594416 | 0.41368065 | 0.05110337 | 3 | 78.76190476 | 0.73883117 | 18296  | 0.07705415  |
| 0.00011078 | 2.41168831 | 0.41464728 | 0.04201681 | 4 | 73.31428571 | 0.71766234 | 18768  | 0.08488275  |
| 0.00010132 | 2.39220779 | 0.41802389 | 0.03453453 | 4 | 71.86486486 | 0.72155844 | 21640  | 0.08086682  |
| 0.00009618 | 2.65519481 | 0.3766202  | 0.01139601 | 4 | 52.33333333 | 0.66896104 | 14640  | 0.10622375  |
| 0.00009605 | 2.73051948 | 0.36623068 | 0.00168067 | 4 | 52.42857143 | 0.6538961  | 20758  | 0.14585188  |
| 0.00009561 | 2.75064935 | 0.36355052 | 0.00142248 | 4 | 49.44726842 | 0.64987013 | 24424  | 0.15299685  |
| 0.00008918 | 2.62532468 | 0.38090527 | 0.01351351 | 4 | 57.13513514 | 0.67493506 | 21258  | 0.10915364  |
| 0.00006726 | 2.43051948 | 0.41143468 | 0.04233871 | 4 | 76          | 0.7138961  | 13666  | 0.0907488   |
| 0.00004665 | 2.73246753 | 0.36596958 | 0          | 4 | 53.53571429 | 0.65350649 | 13326  | 0.14472649  |
| 0.00004665 | 2.73246753 | 0.36596958 | 0          | 4 | 53.53571429 | 0.65350649 | 13326  | 0.14472649  |
| 0.00004665 | 2.73246753 | 0.36596958 | 0          | 4 | 53.53571429 | 0.65350649 | 13326  | 0.14472649  |
